# Supplementary material
Source: bioRxiv or medRxiv preprint supplement (https://www.biorxiv.org/highwire/filestream/23330/field_highwire_adjunct_files/2/083931-11.pdf)
Supplement: Supplementary file [file 083931-11.pdf]

Figure S11.3

*H. melpomene*

Split reads only

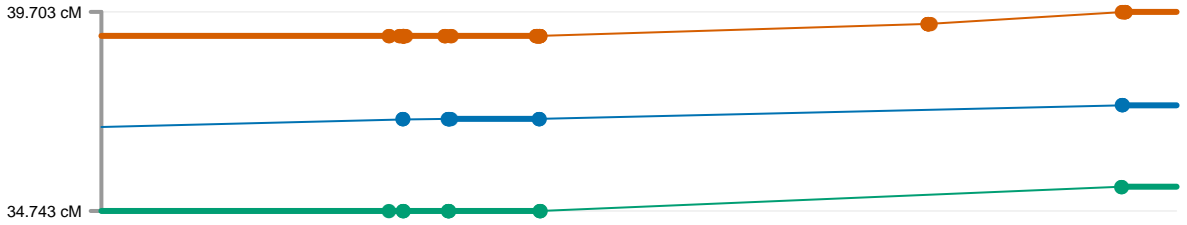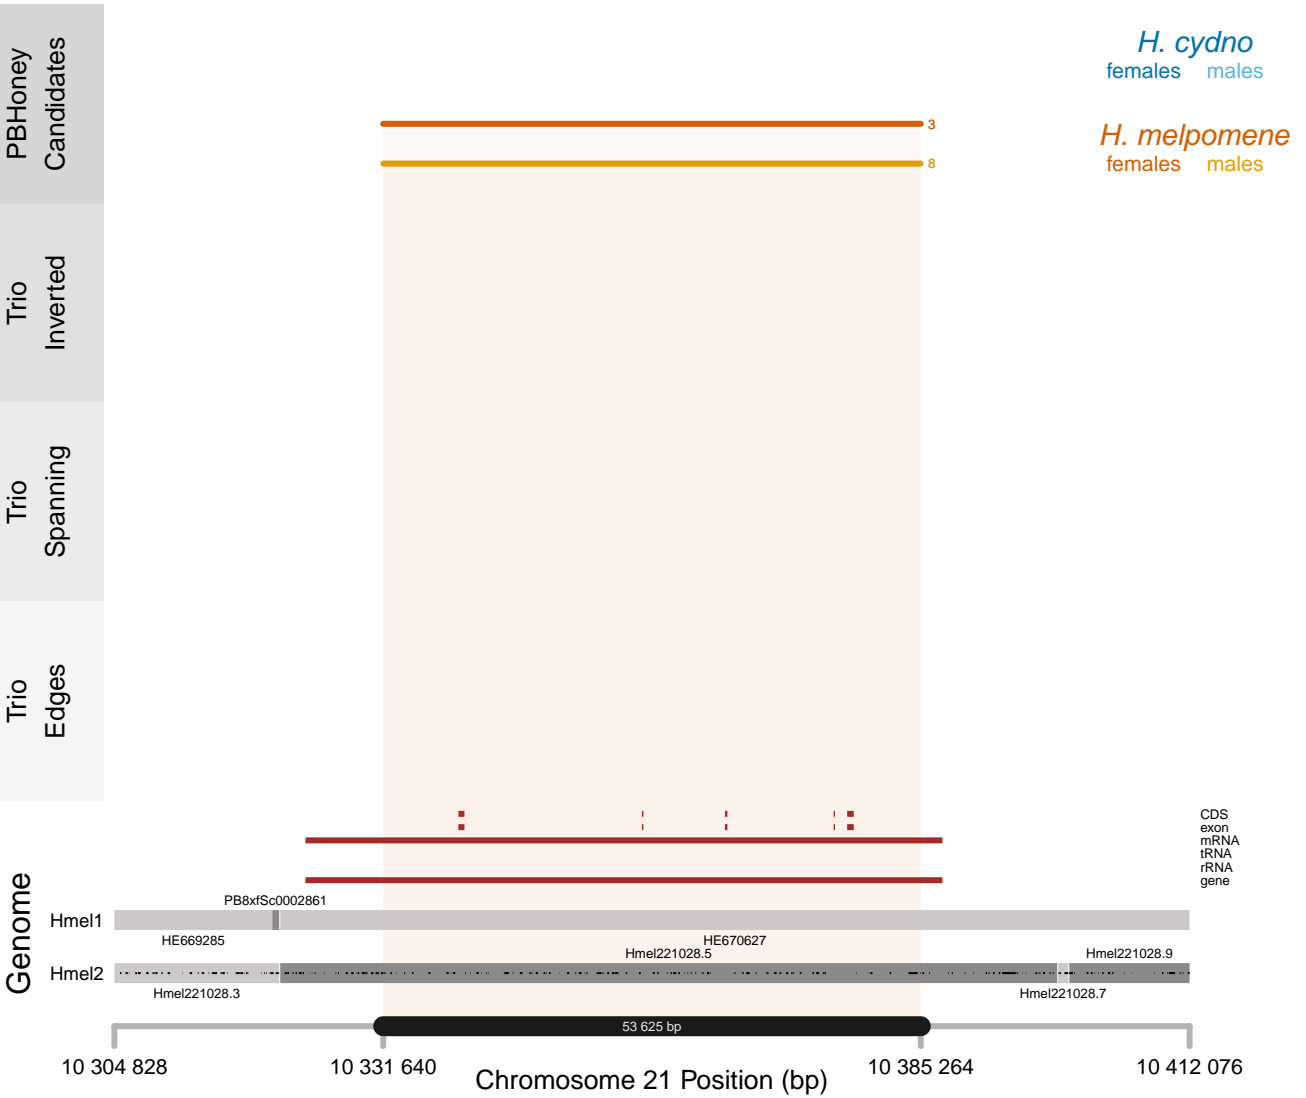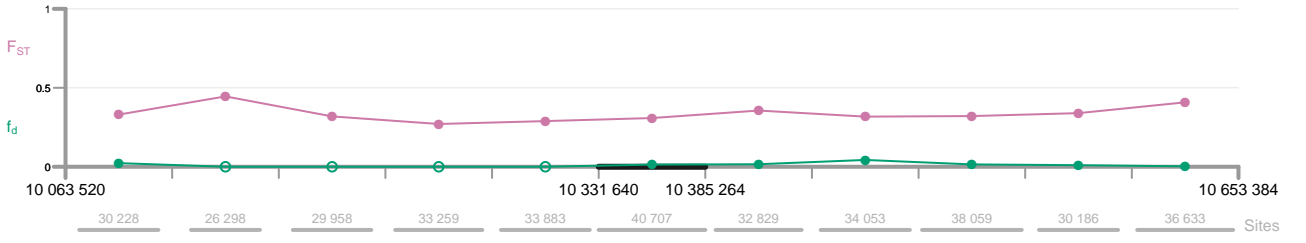

Figure S11.4

*H. melpomene*

Split reads only

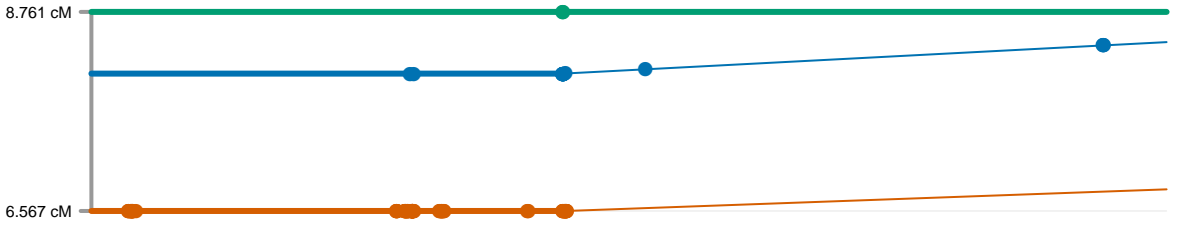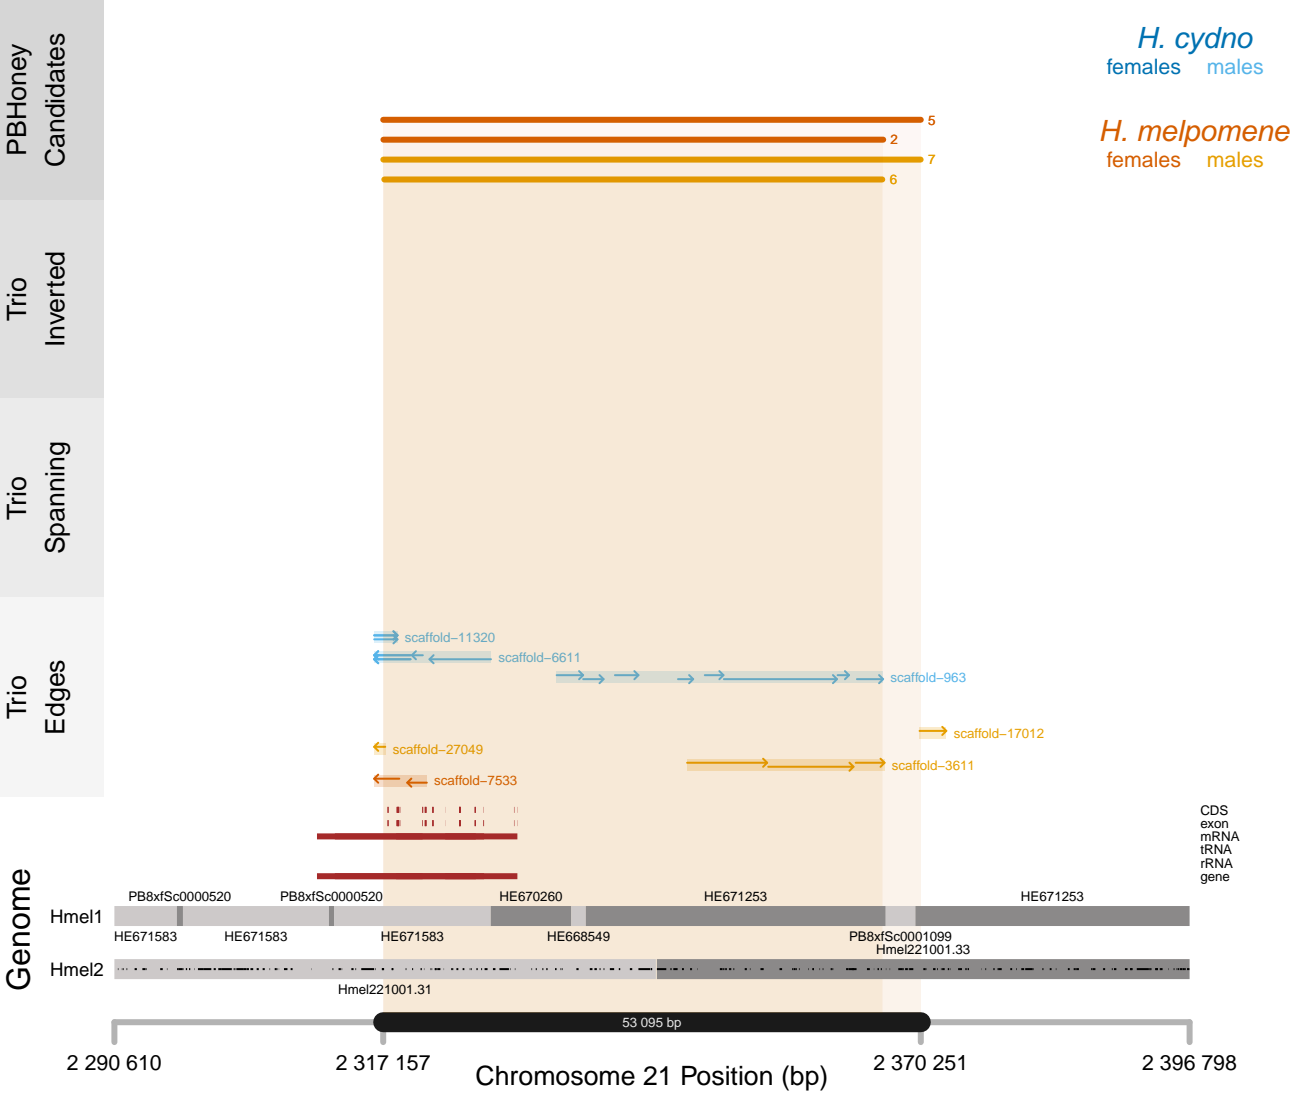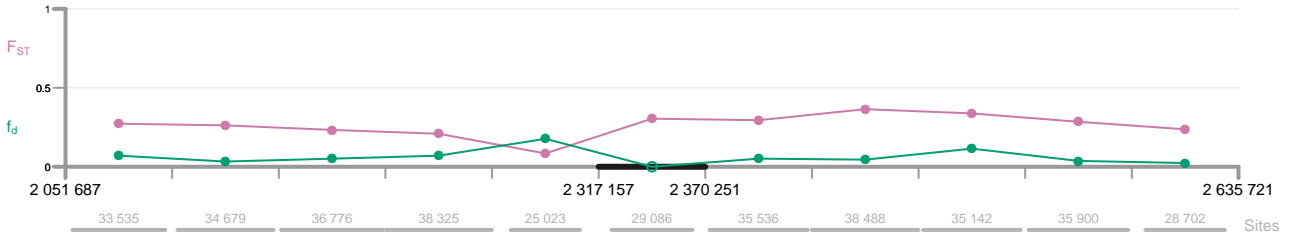

Figure S11.5

*H. melpomene*

Split reads only

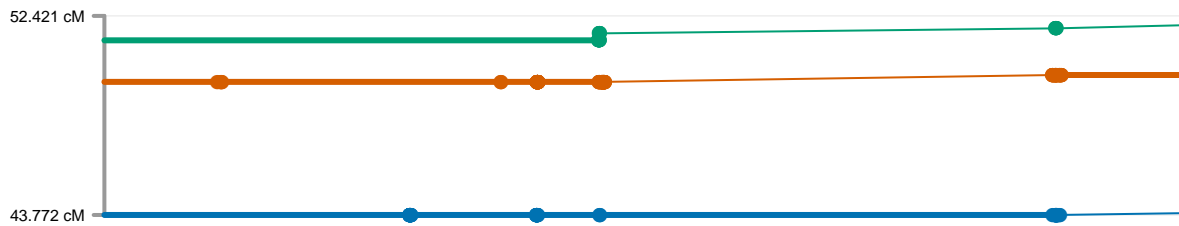

PBHoney Candidates

Trio Inverted

Trio Spanning

Trio Edges

*H. cydno*  
females males

*H. melpomene*  
females males

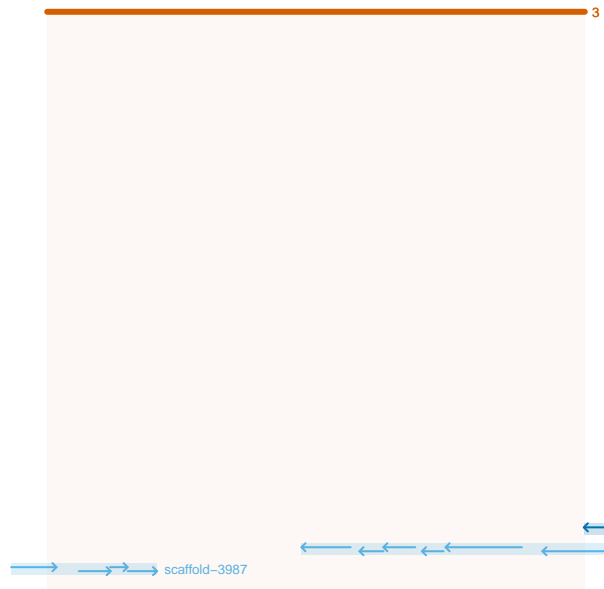

Genome

CDS  
exon  
mRNA  
tRNA  
rRNA  
gene

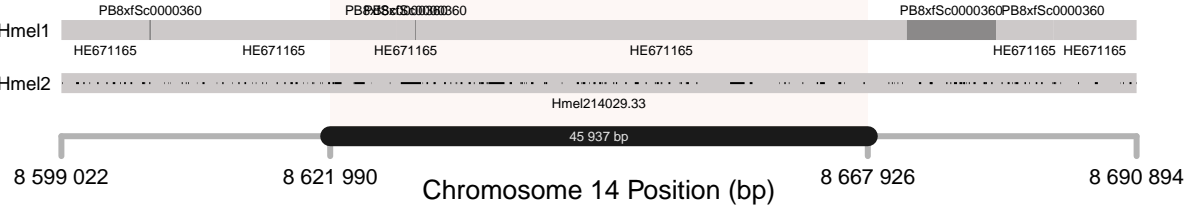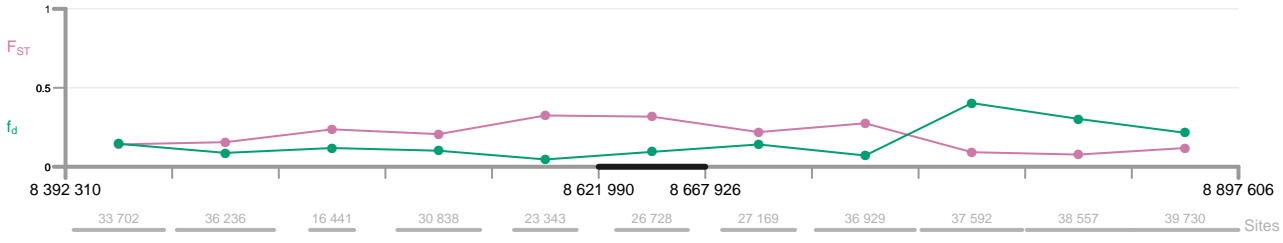

Figure S11.6

*H. melpomene*

Split reads only

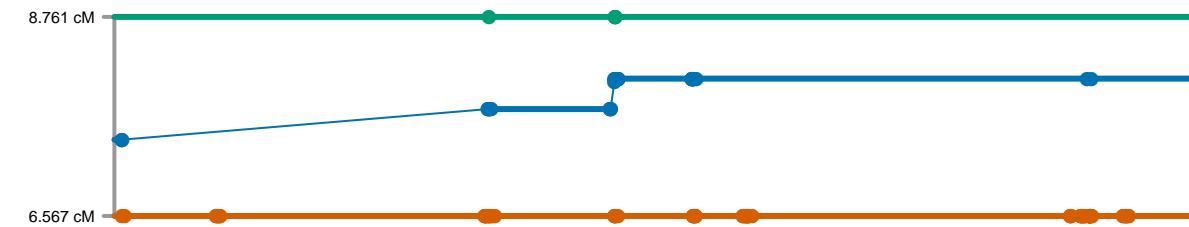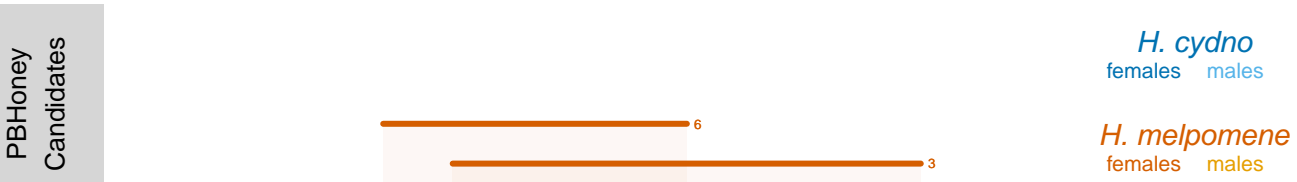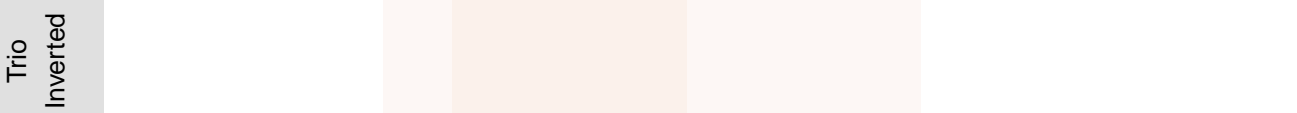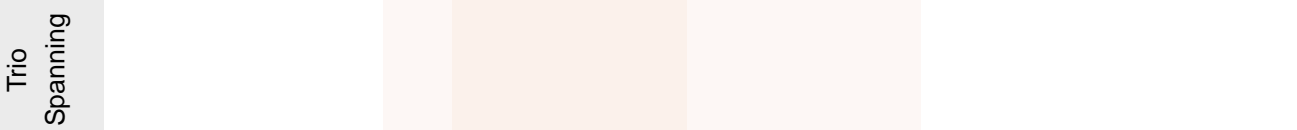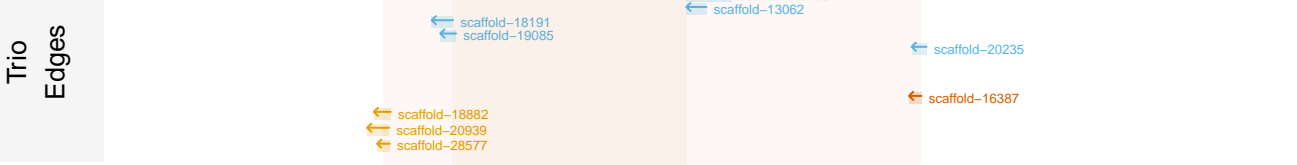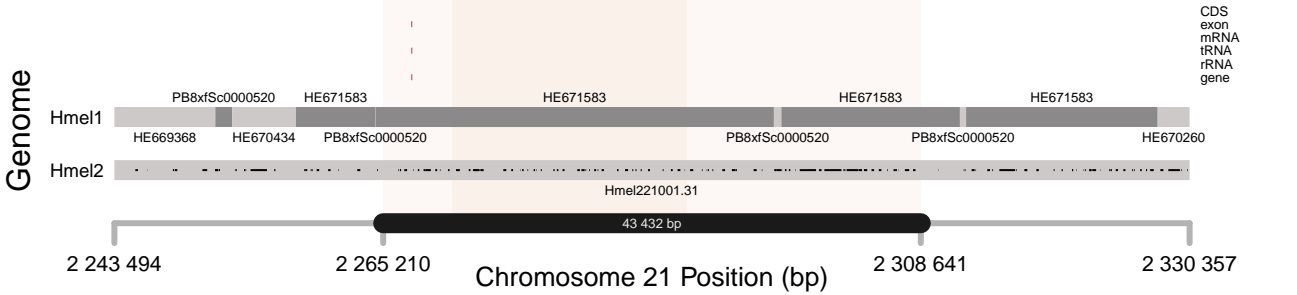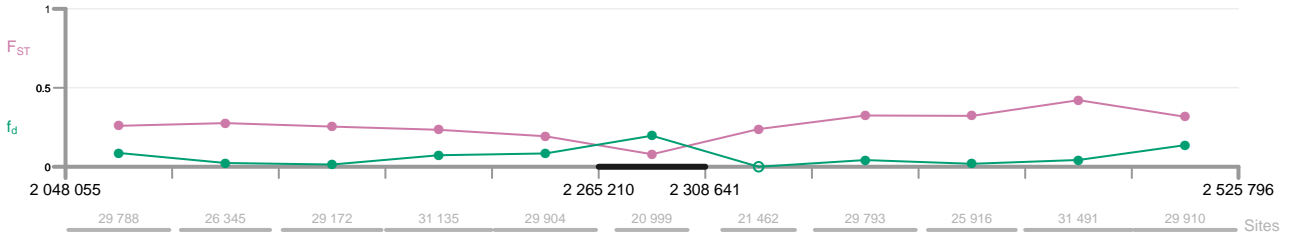

Figure S11.7

*H. melpomene*

Split reads only

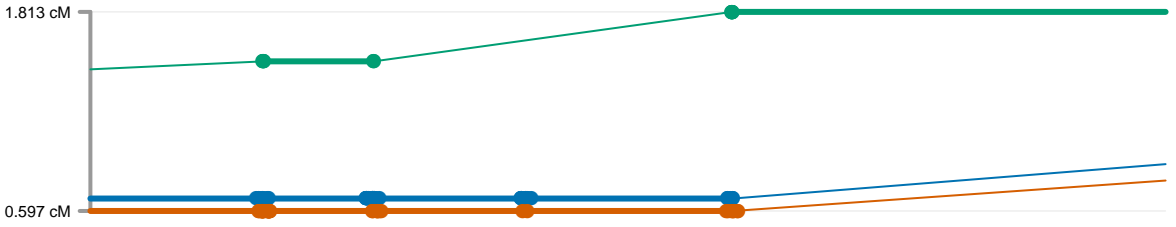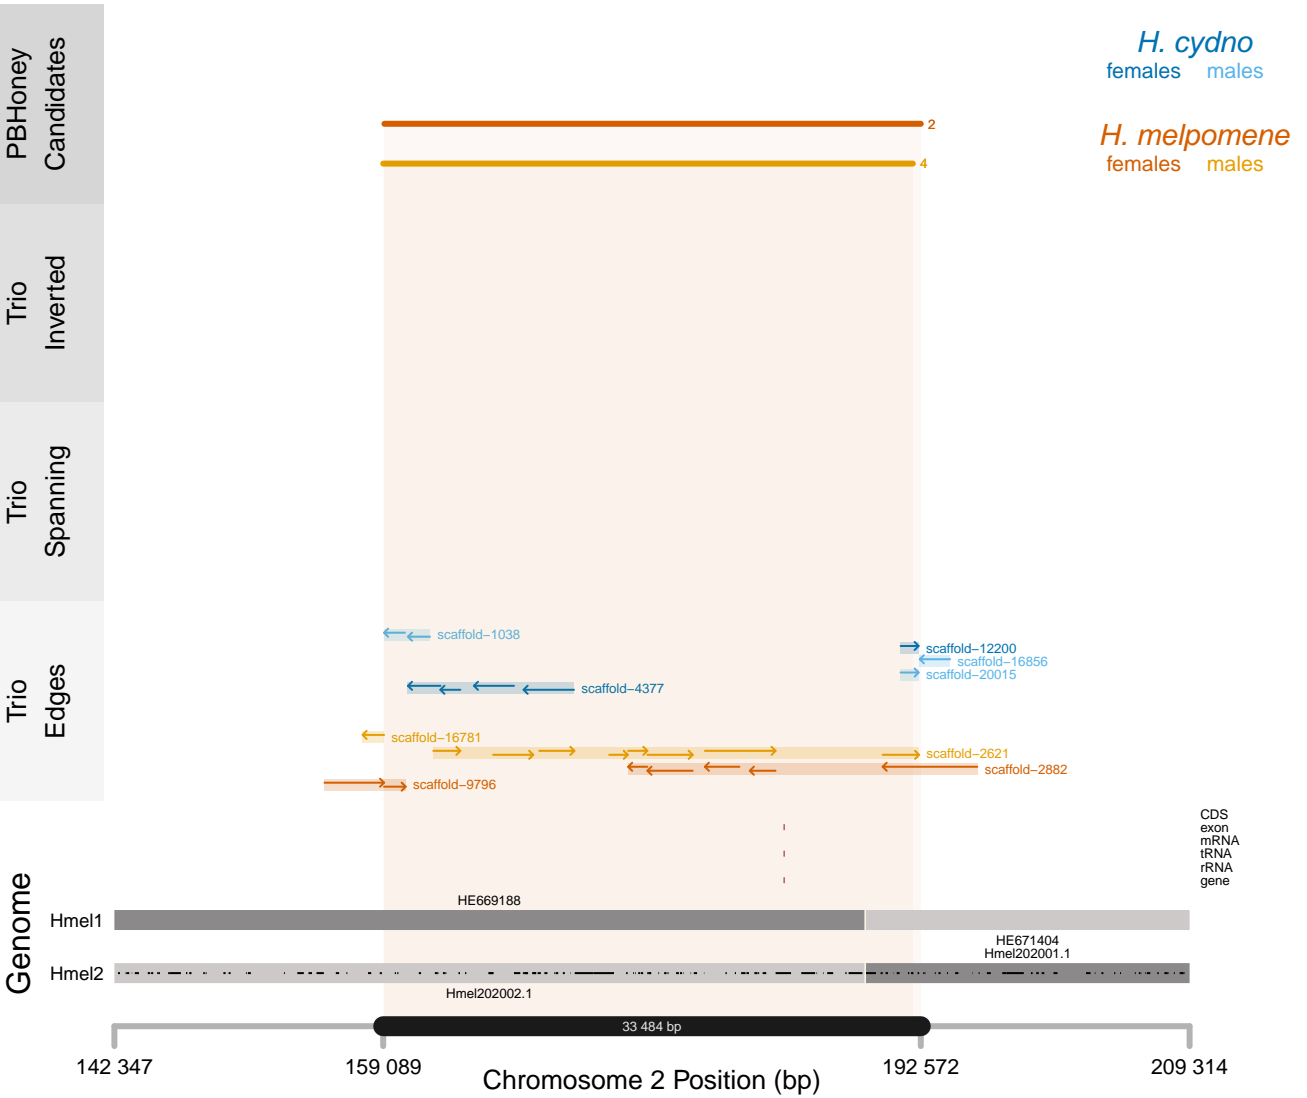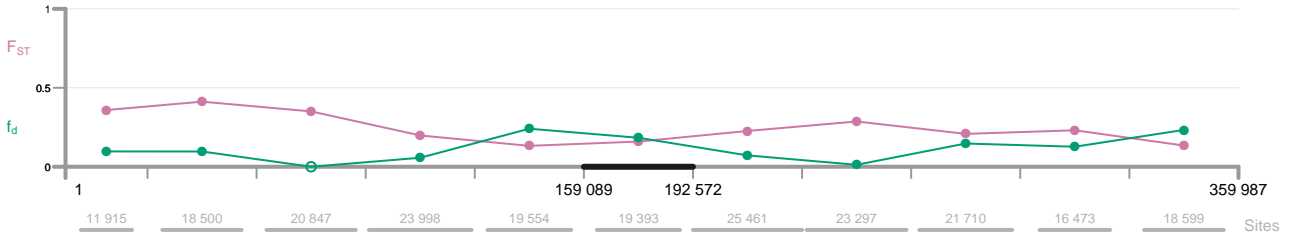

Figure S11.8

*H. melpomene*

Split reads only

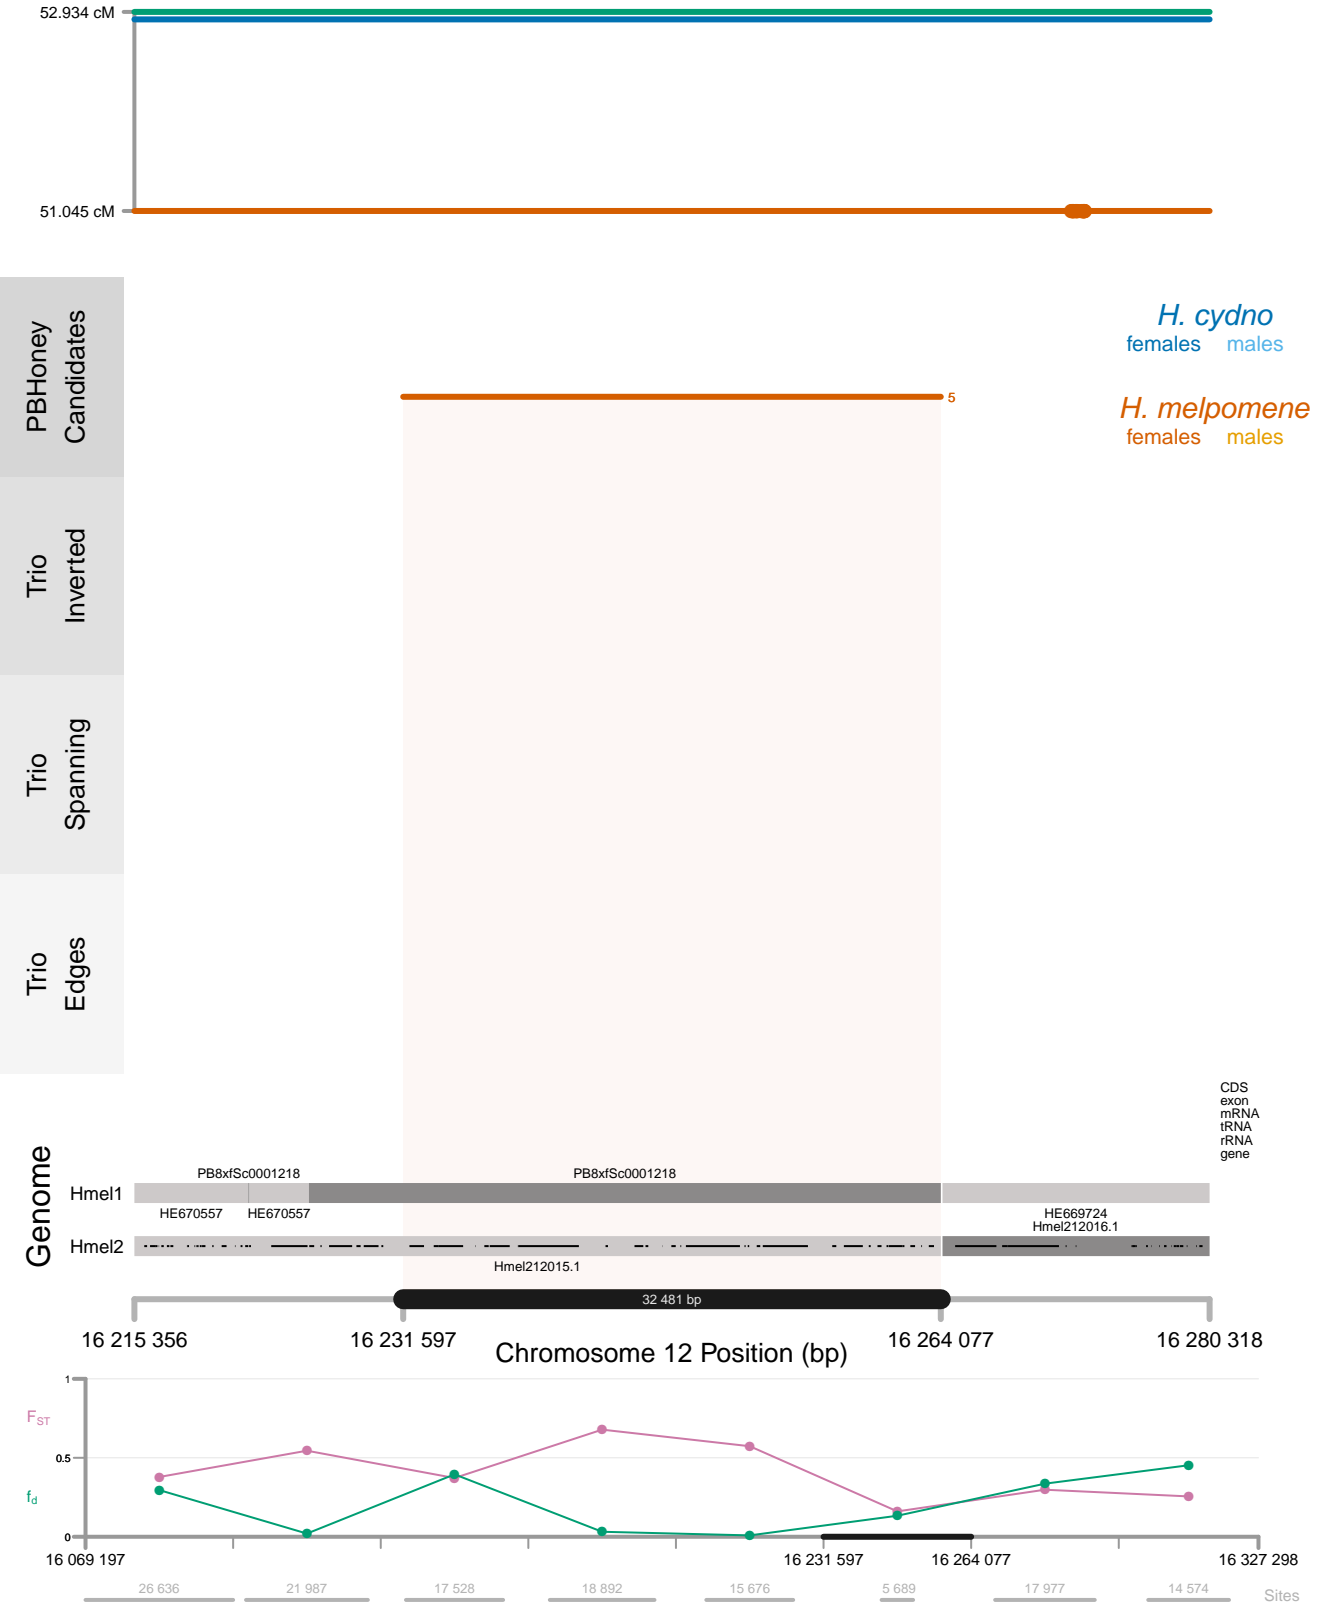



Figure S11.9

*H. melpomene*

Split reads only

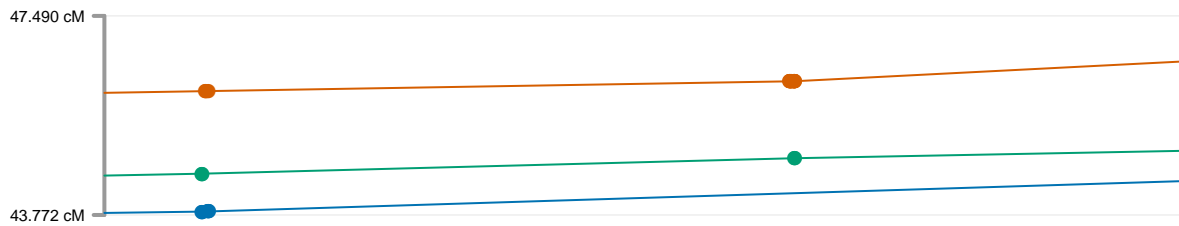

PBHoney Candidates

Trio Inverted

Trio Spanning

Trio Edges

*H. cydno*  
females males

*H. melpomene*  
females males

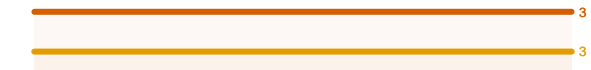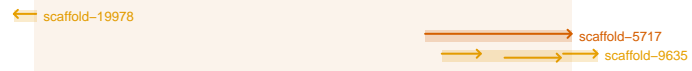

Genome

CDS  
exon  
mRNA  
tRNA  
rRNA  
gene

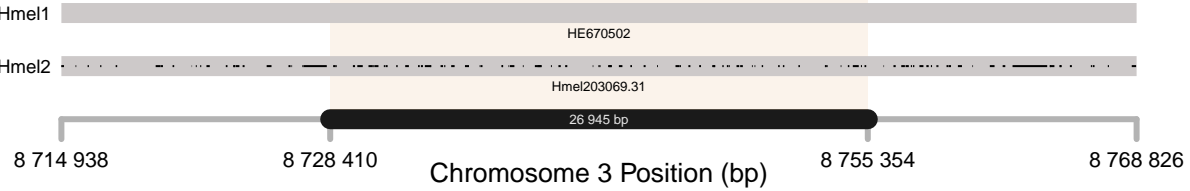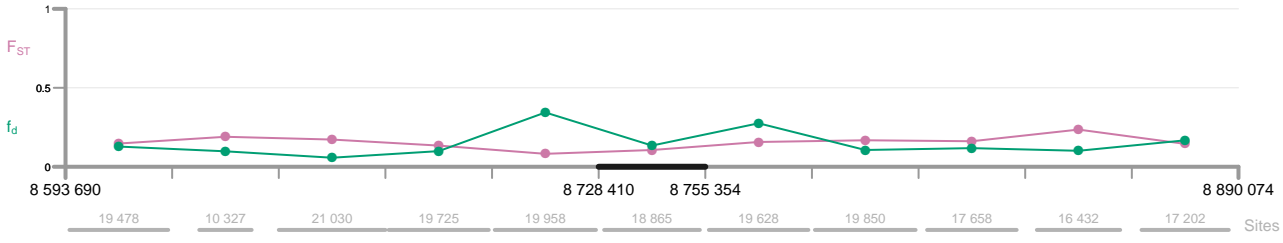

Figure S11.10

*H. melpomene*

Split reads only

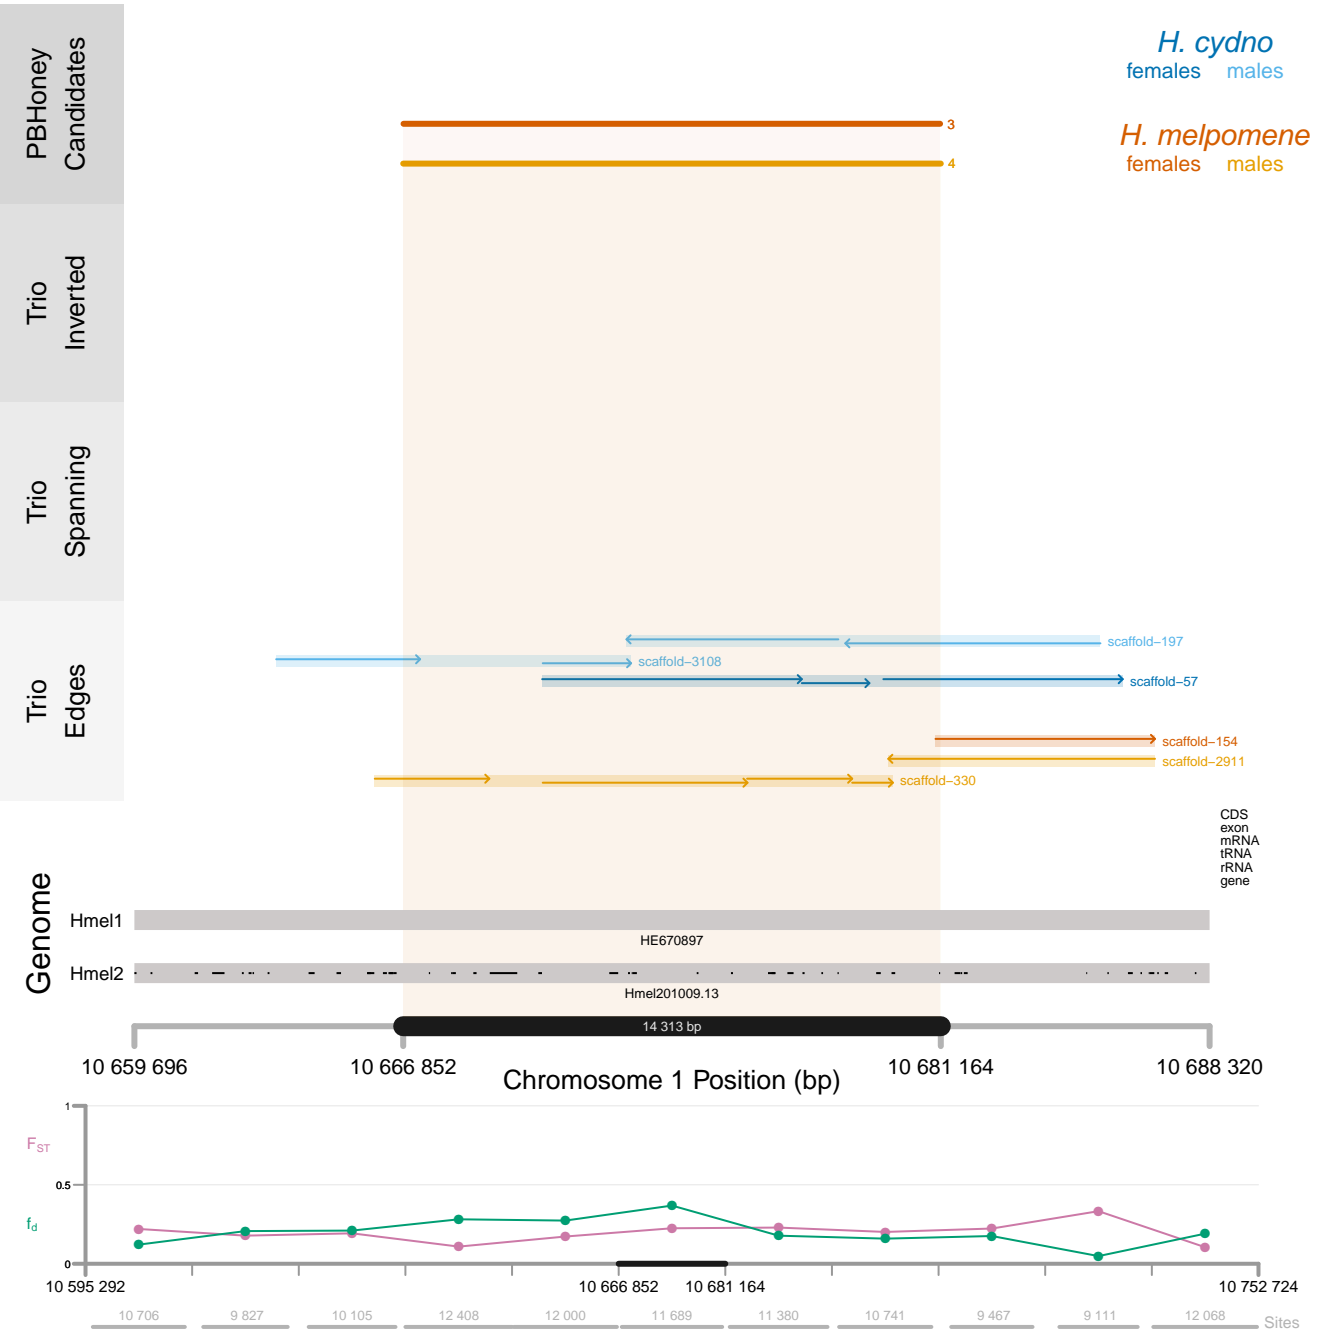

Figure S11.11

*H. melpomene*

Split reads only

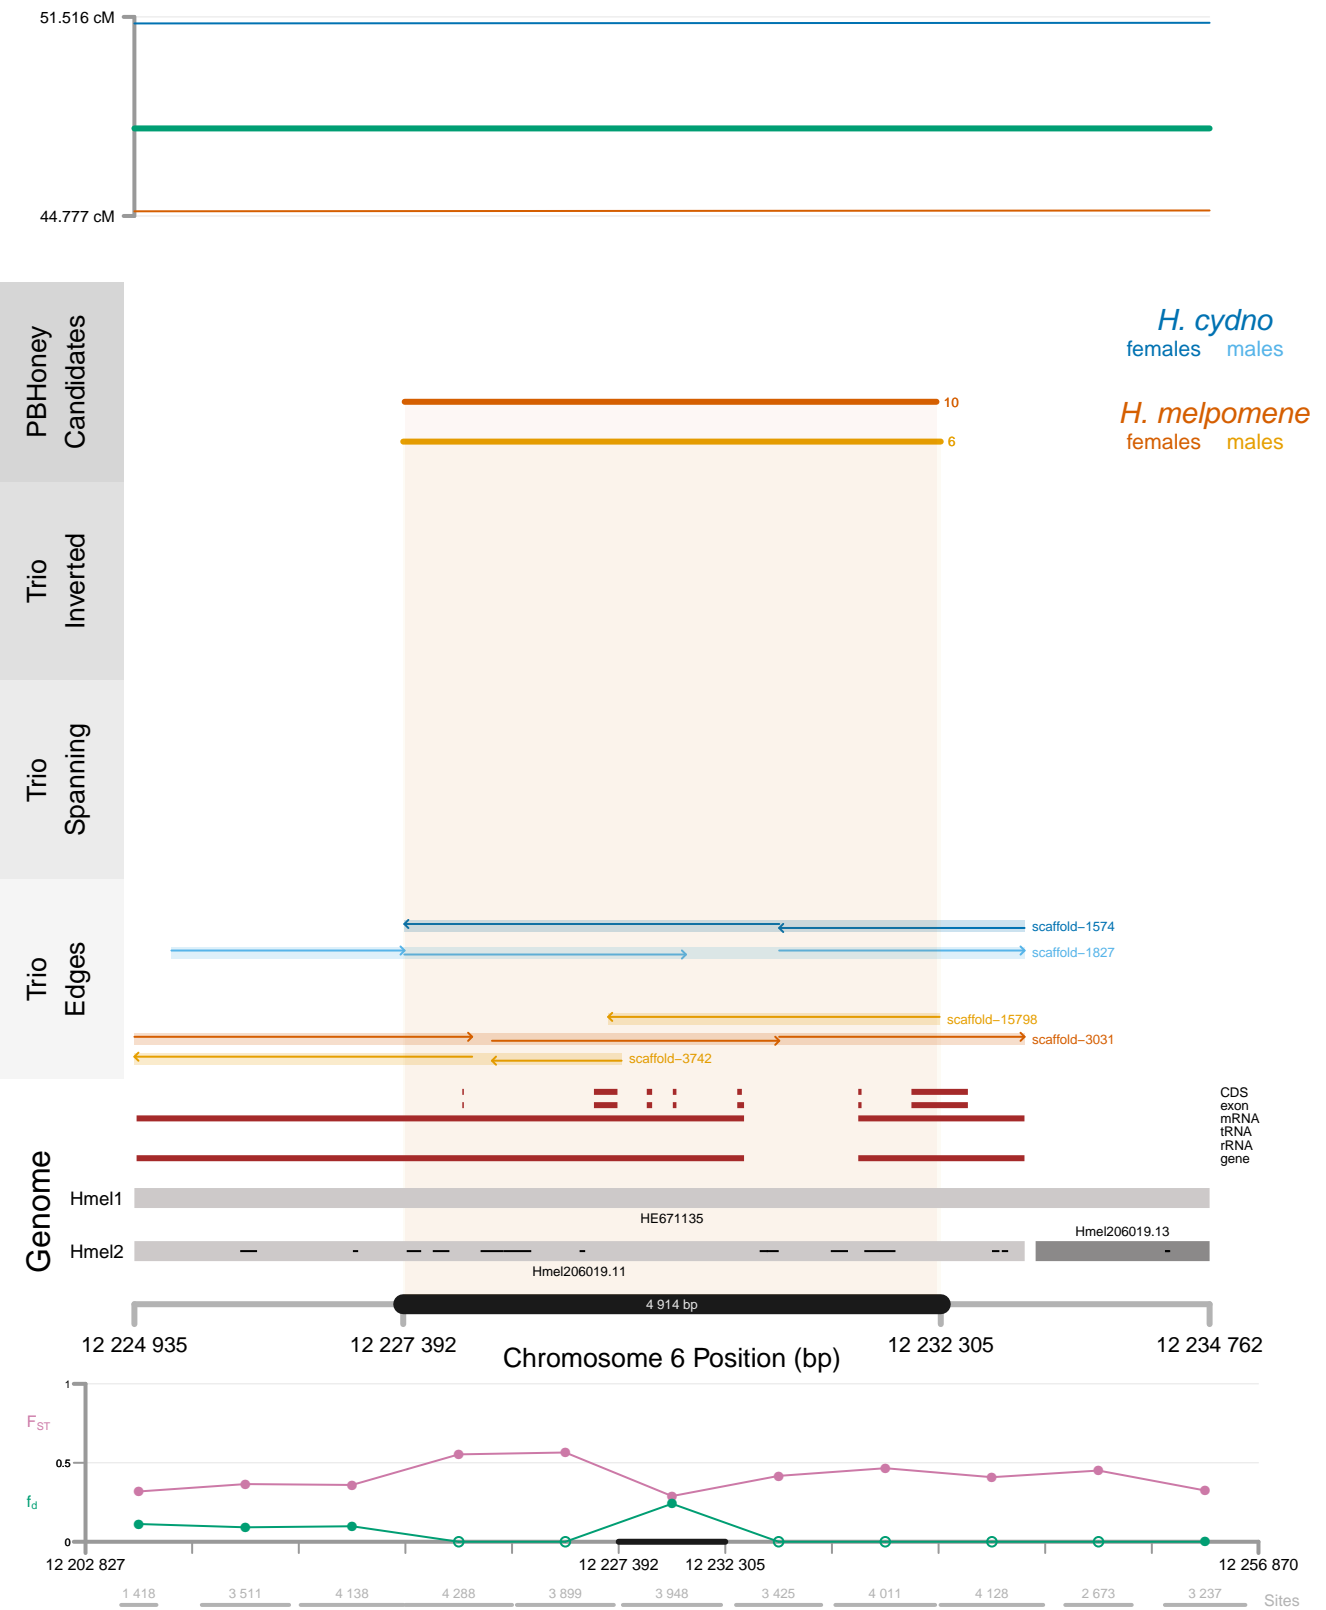

Figure S11.12

*H. melpomene*

Split reads only

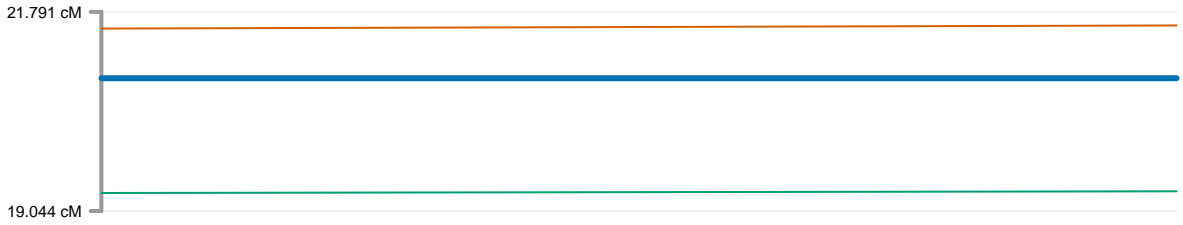

PBHoney Candidates  
Trio Inverted  
Trio Spanning  
Trio Edges

*H. cydno*  
females males  
*H. melpomene*  
females males

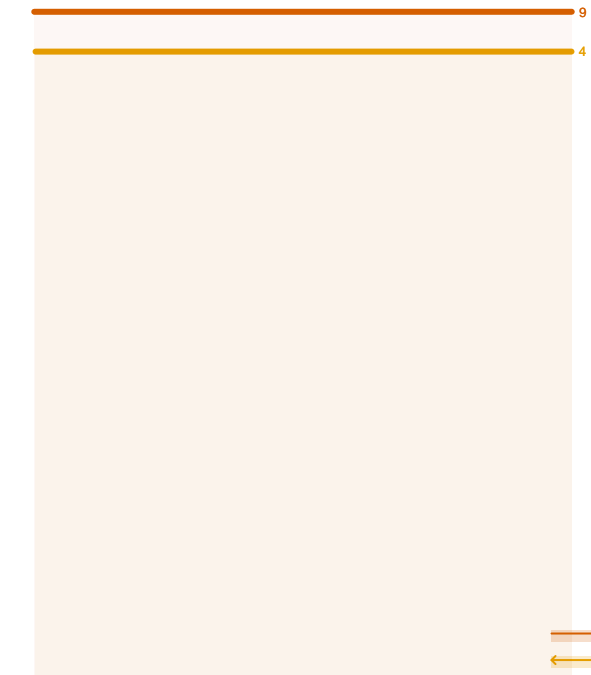

Genome

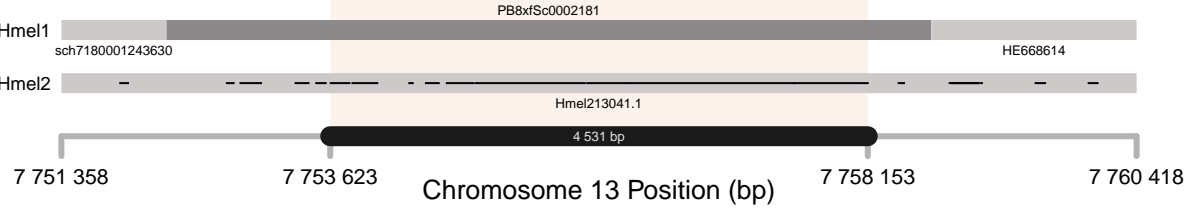

CDS  
exon  
mRNA  
tRNA  
rRNA  
gene

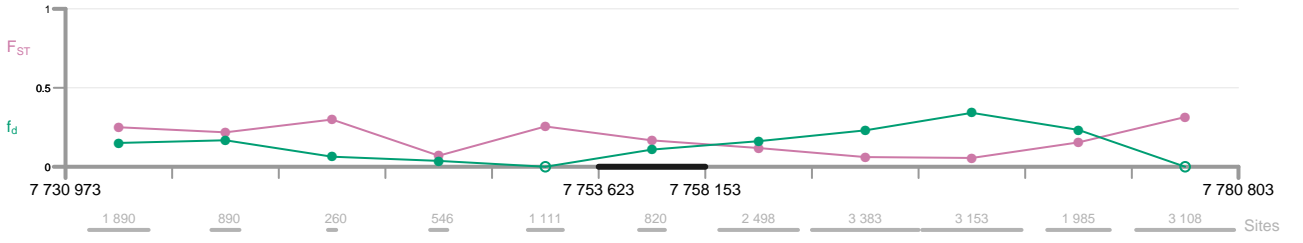

Figure S11.13

*H. melpomene*

Split reads only

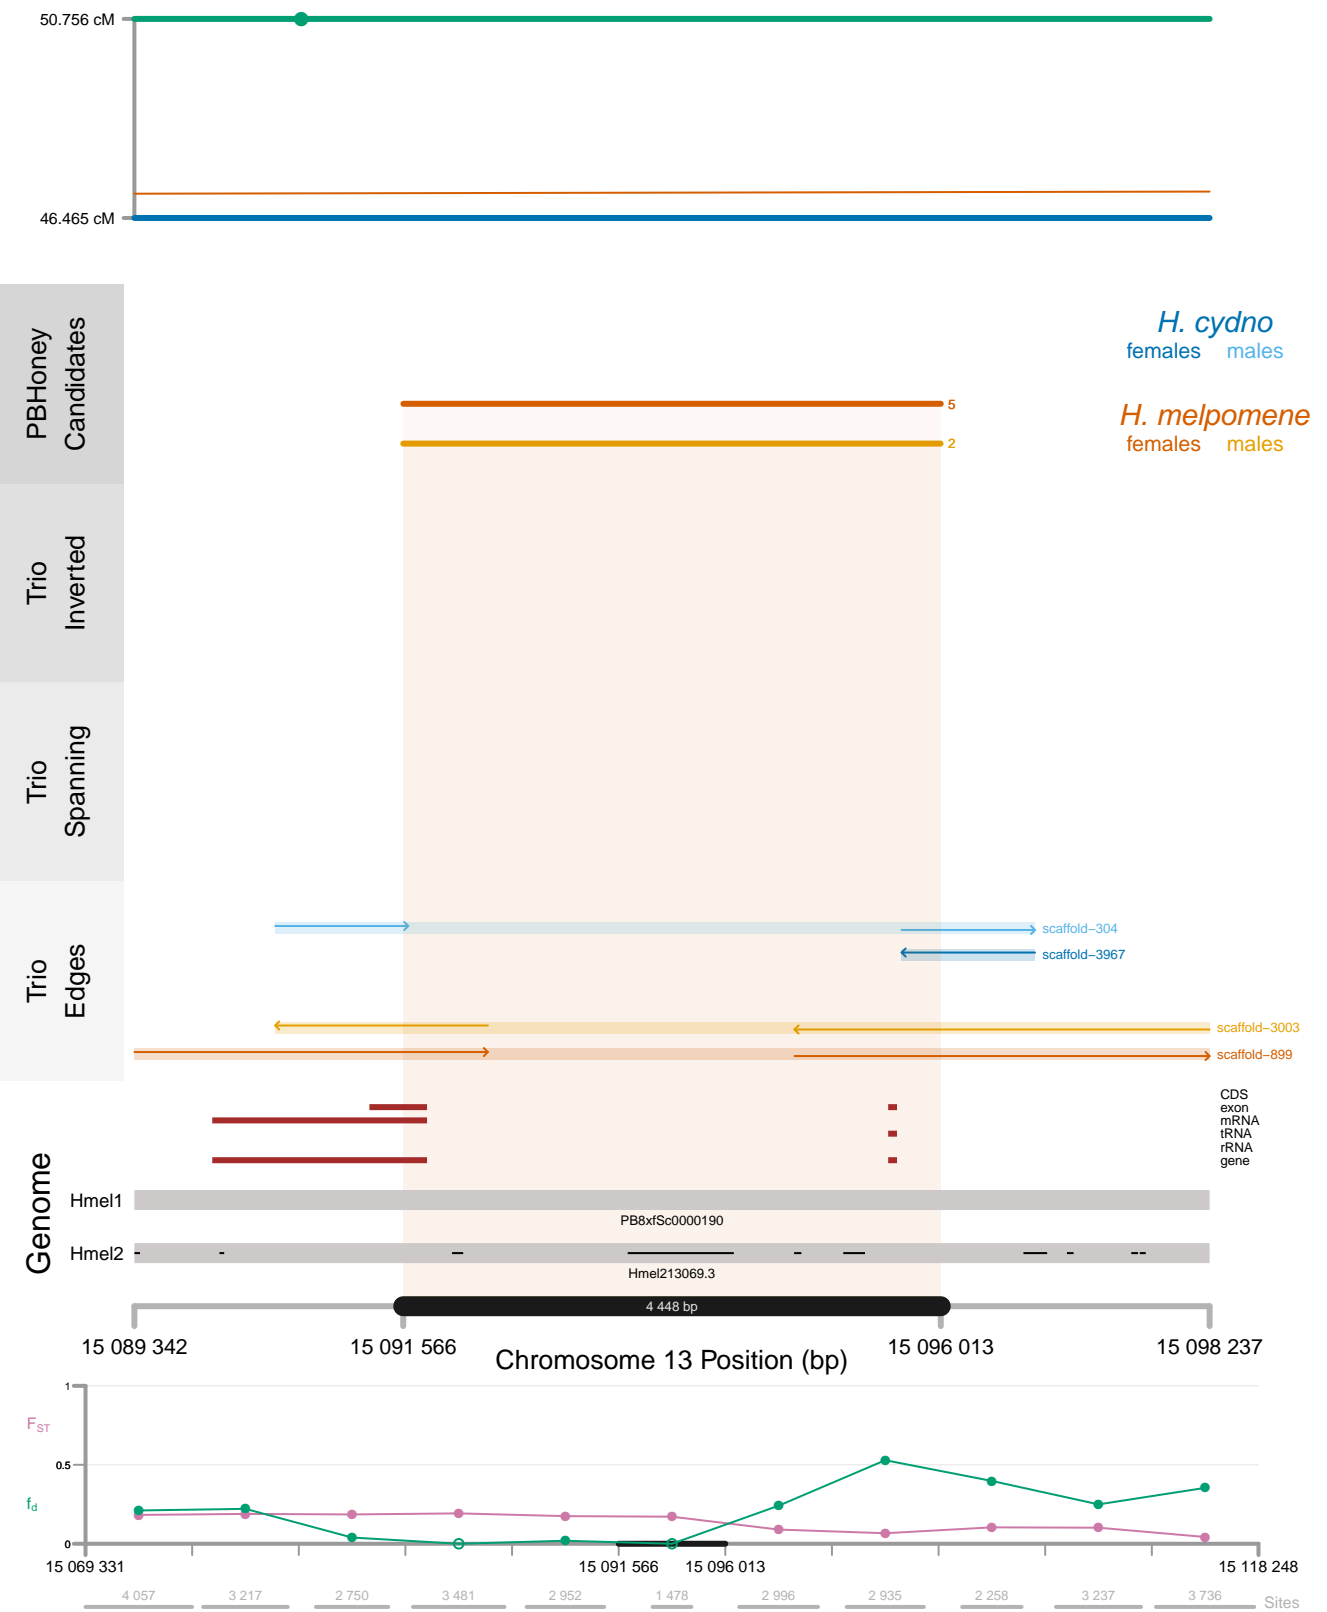

Figure S11.14

*H. melpomene*

Split reads only

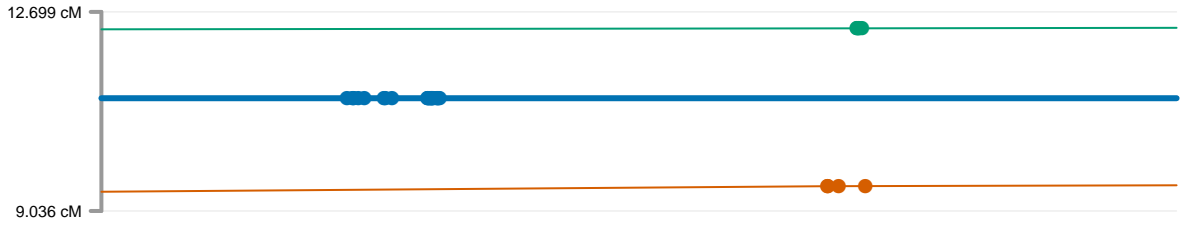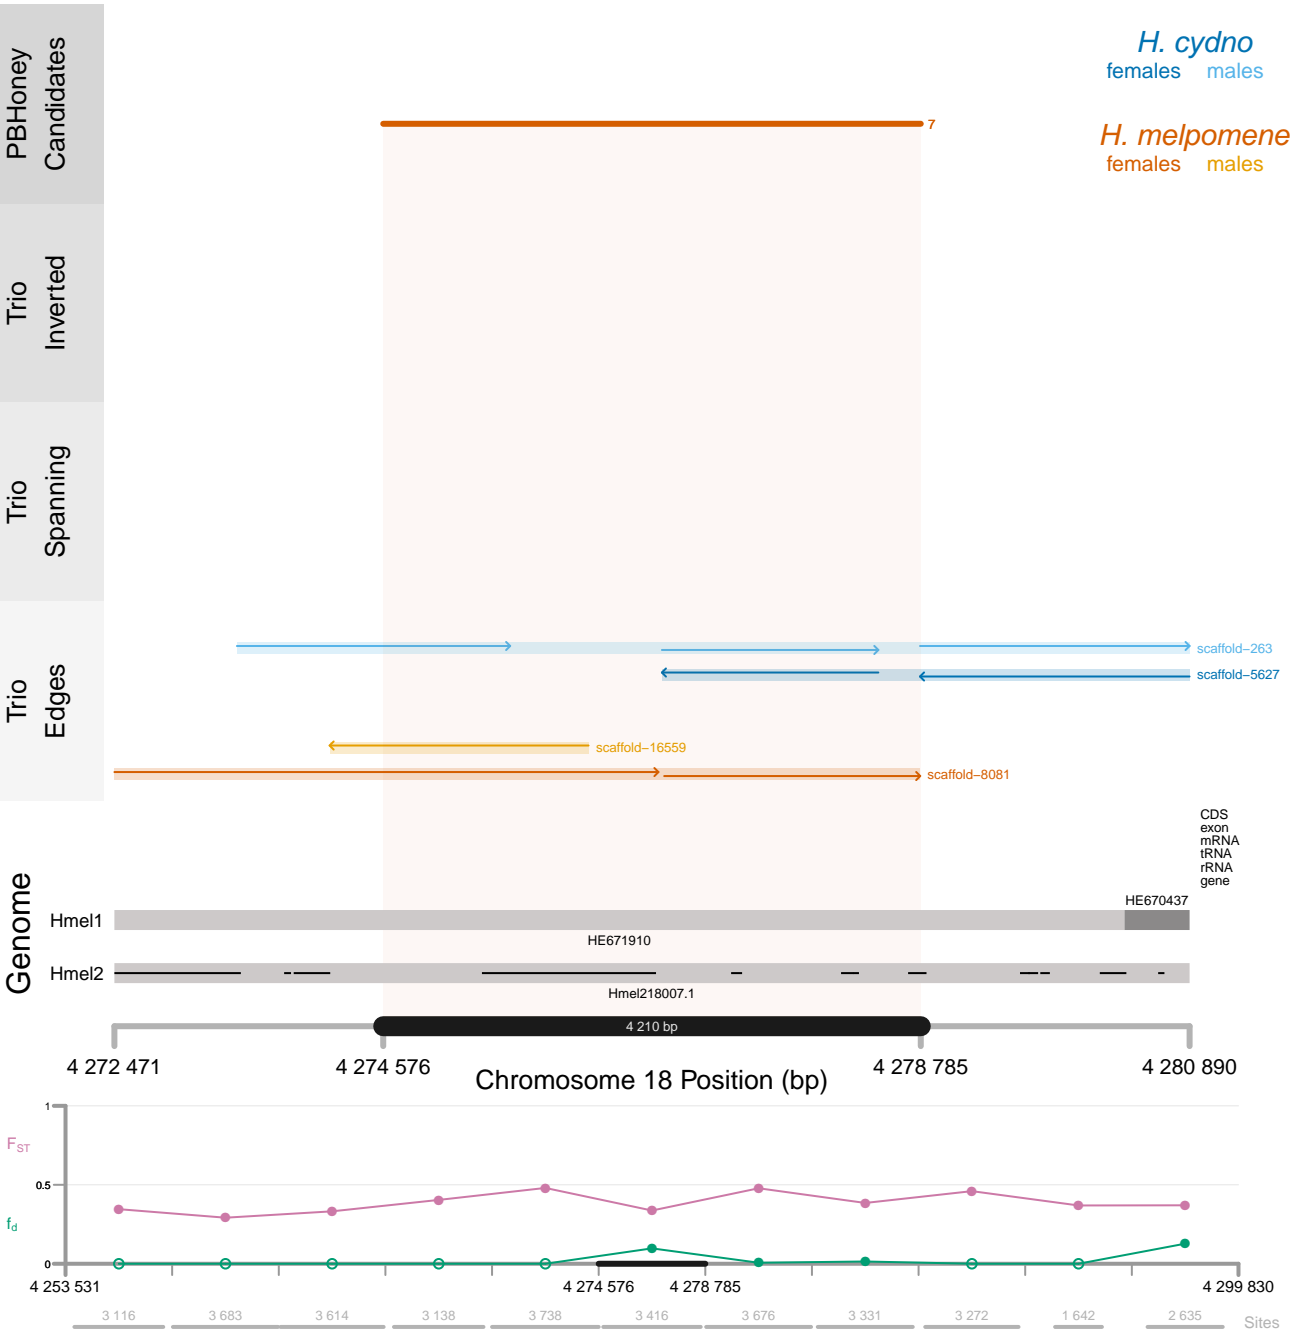

Figure S11.15

*H. melpomene*

Split reads only

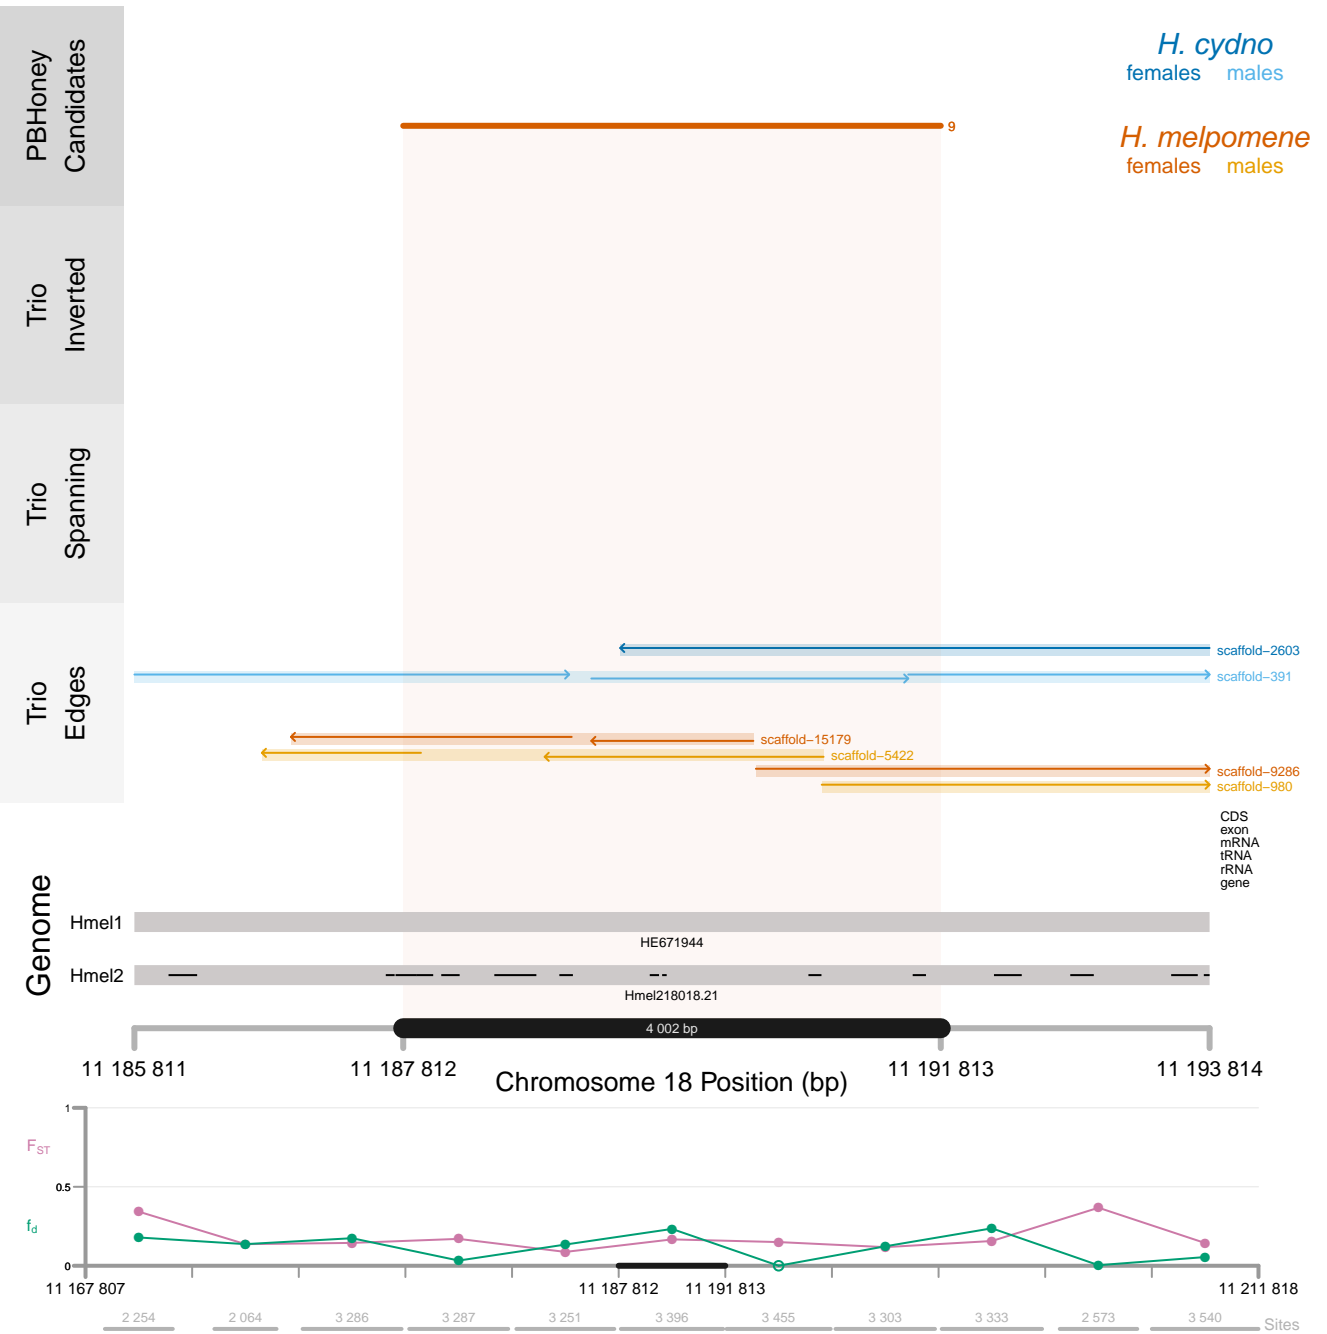

Figure S11.16

*H. melpomene*

Split reads only

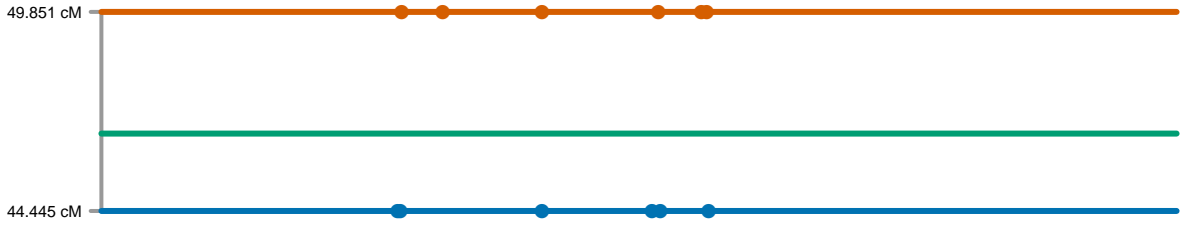

PBHoney  
Candidates

Trio  
Inverted

Trio  
Spanning

Trio  
Edges

*H. cydno*  
females males

*H. melpomene*  
females males

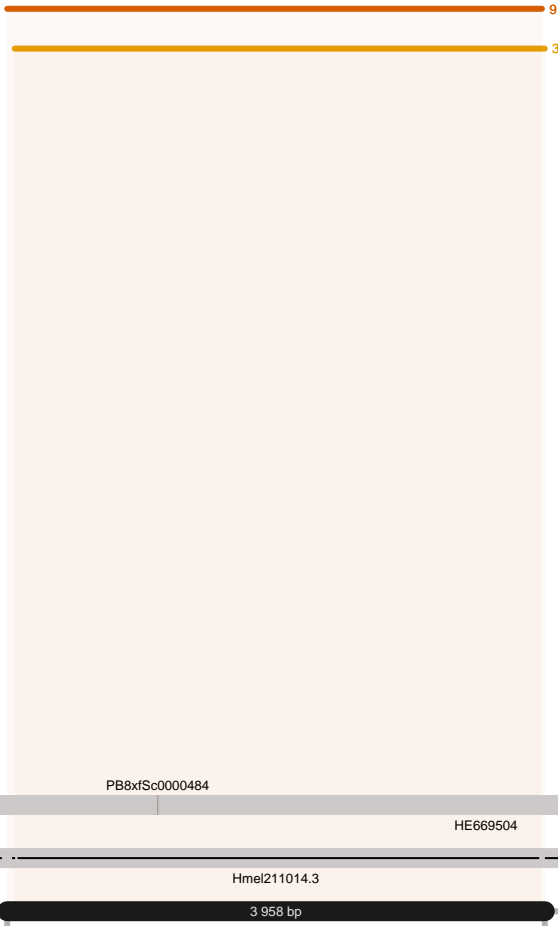

Genome

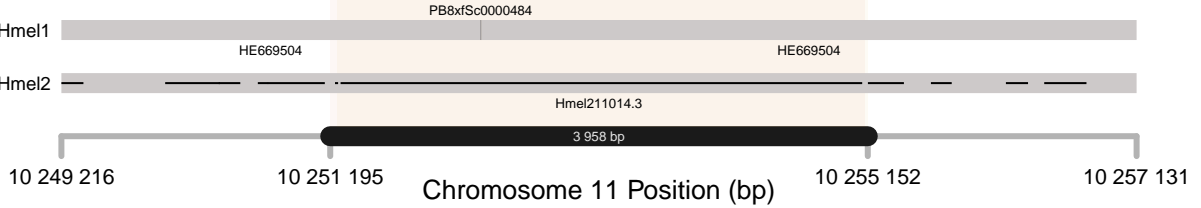

CDS  
exon  
mRNA  
tRNA  
rRNA  
gene

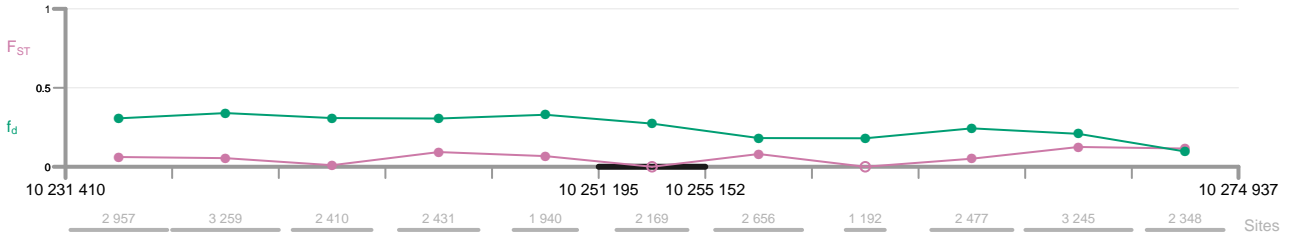



Figure S11.17

*H. melpomene*

Split reads only

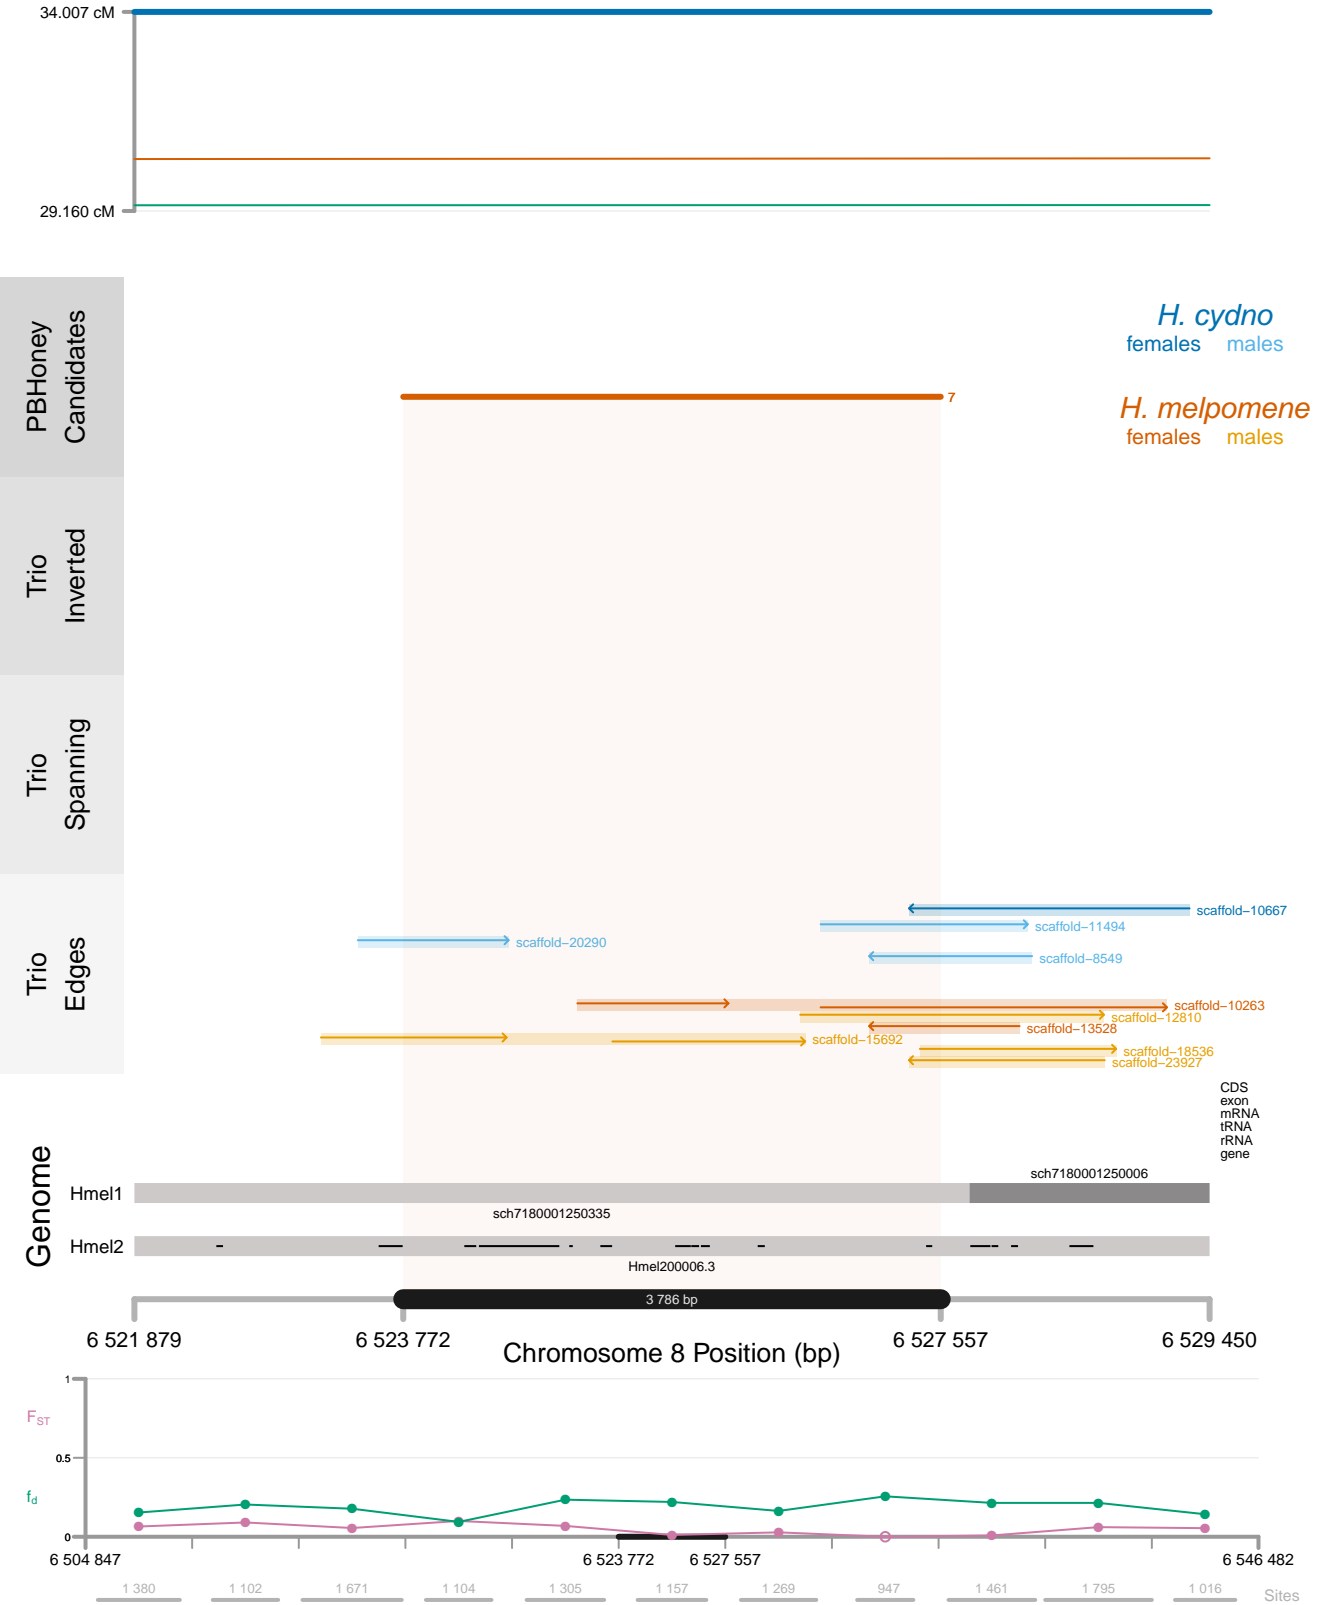

Figure S11.18

*H. melpomene*

Split reads only

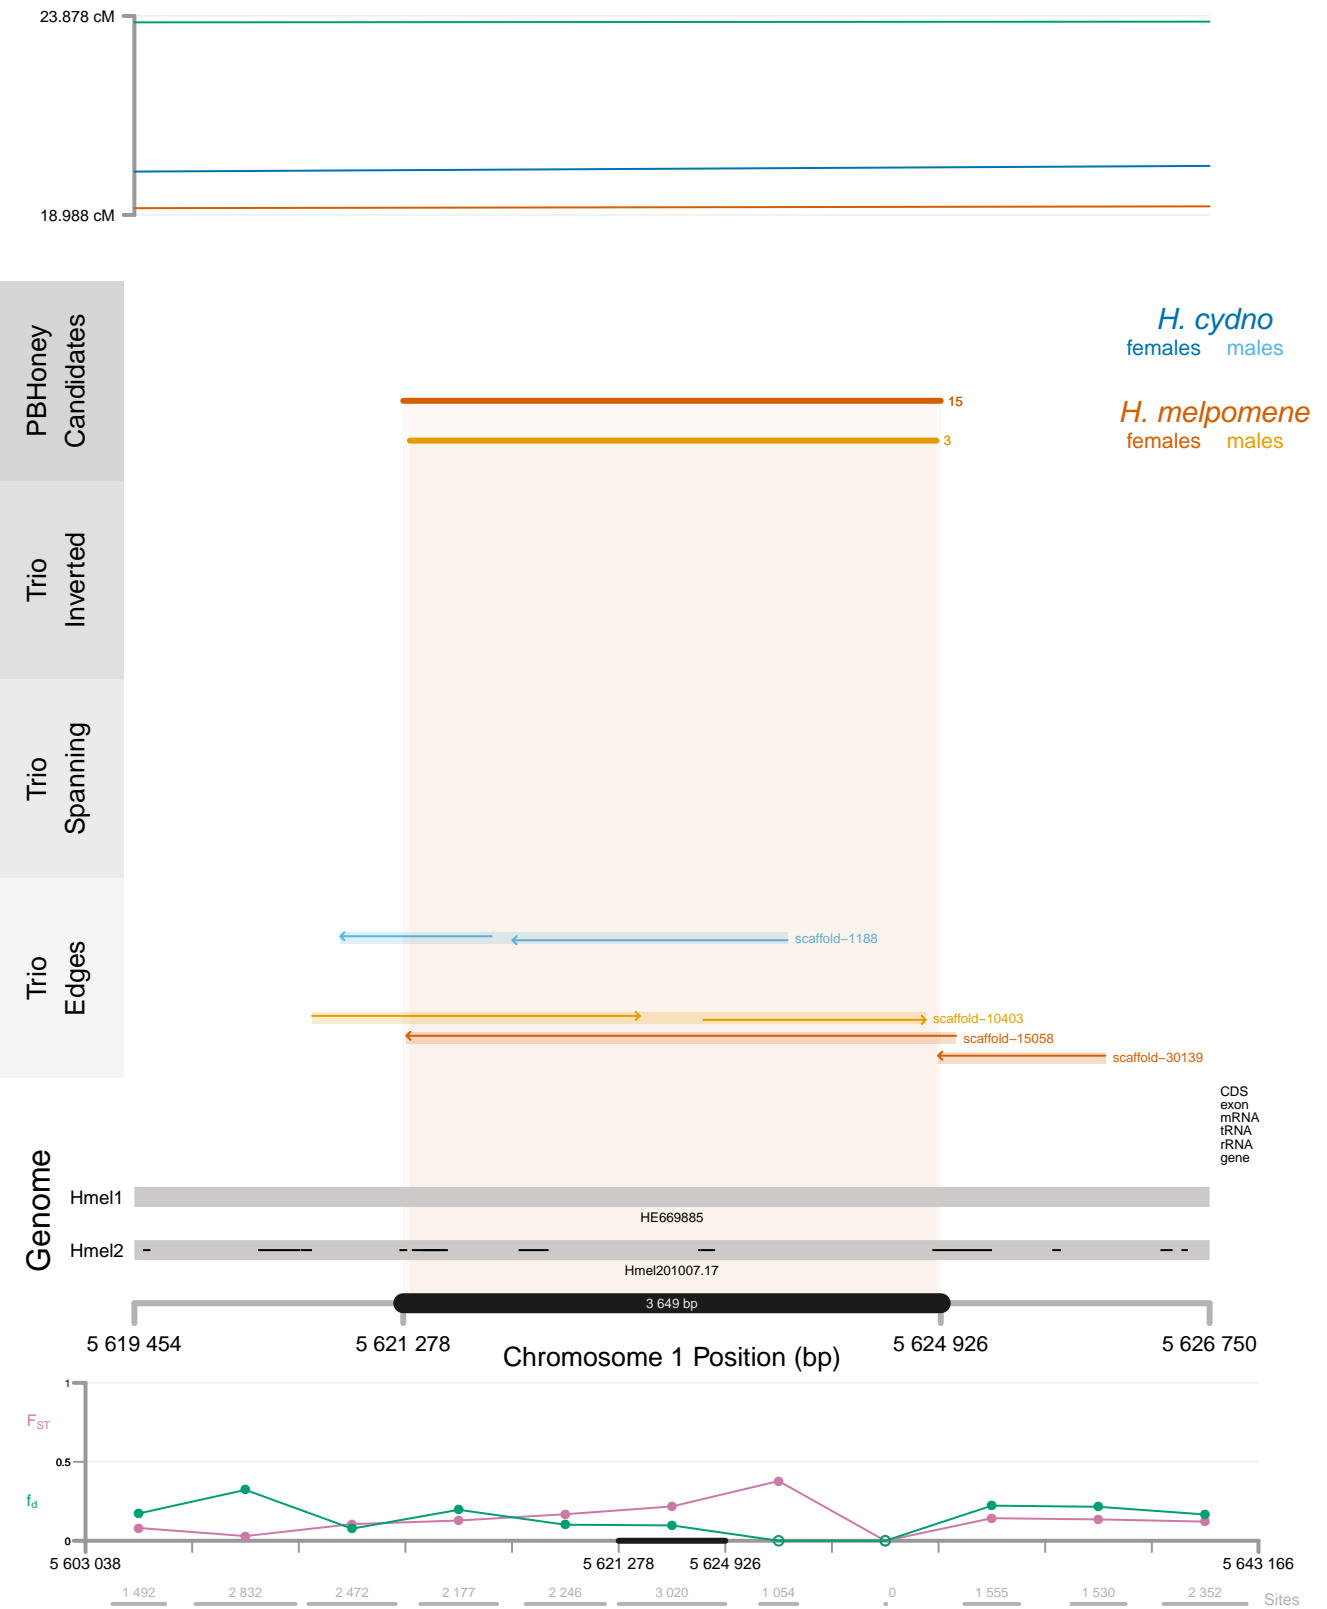

Figure S11.19

*H. melpomene*

Split reads only

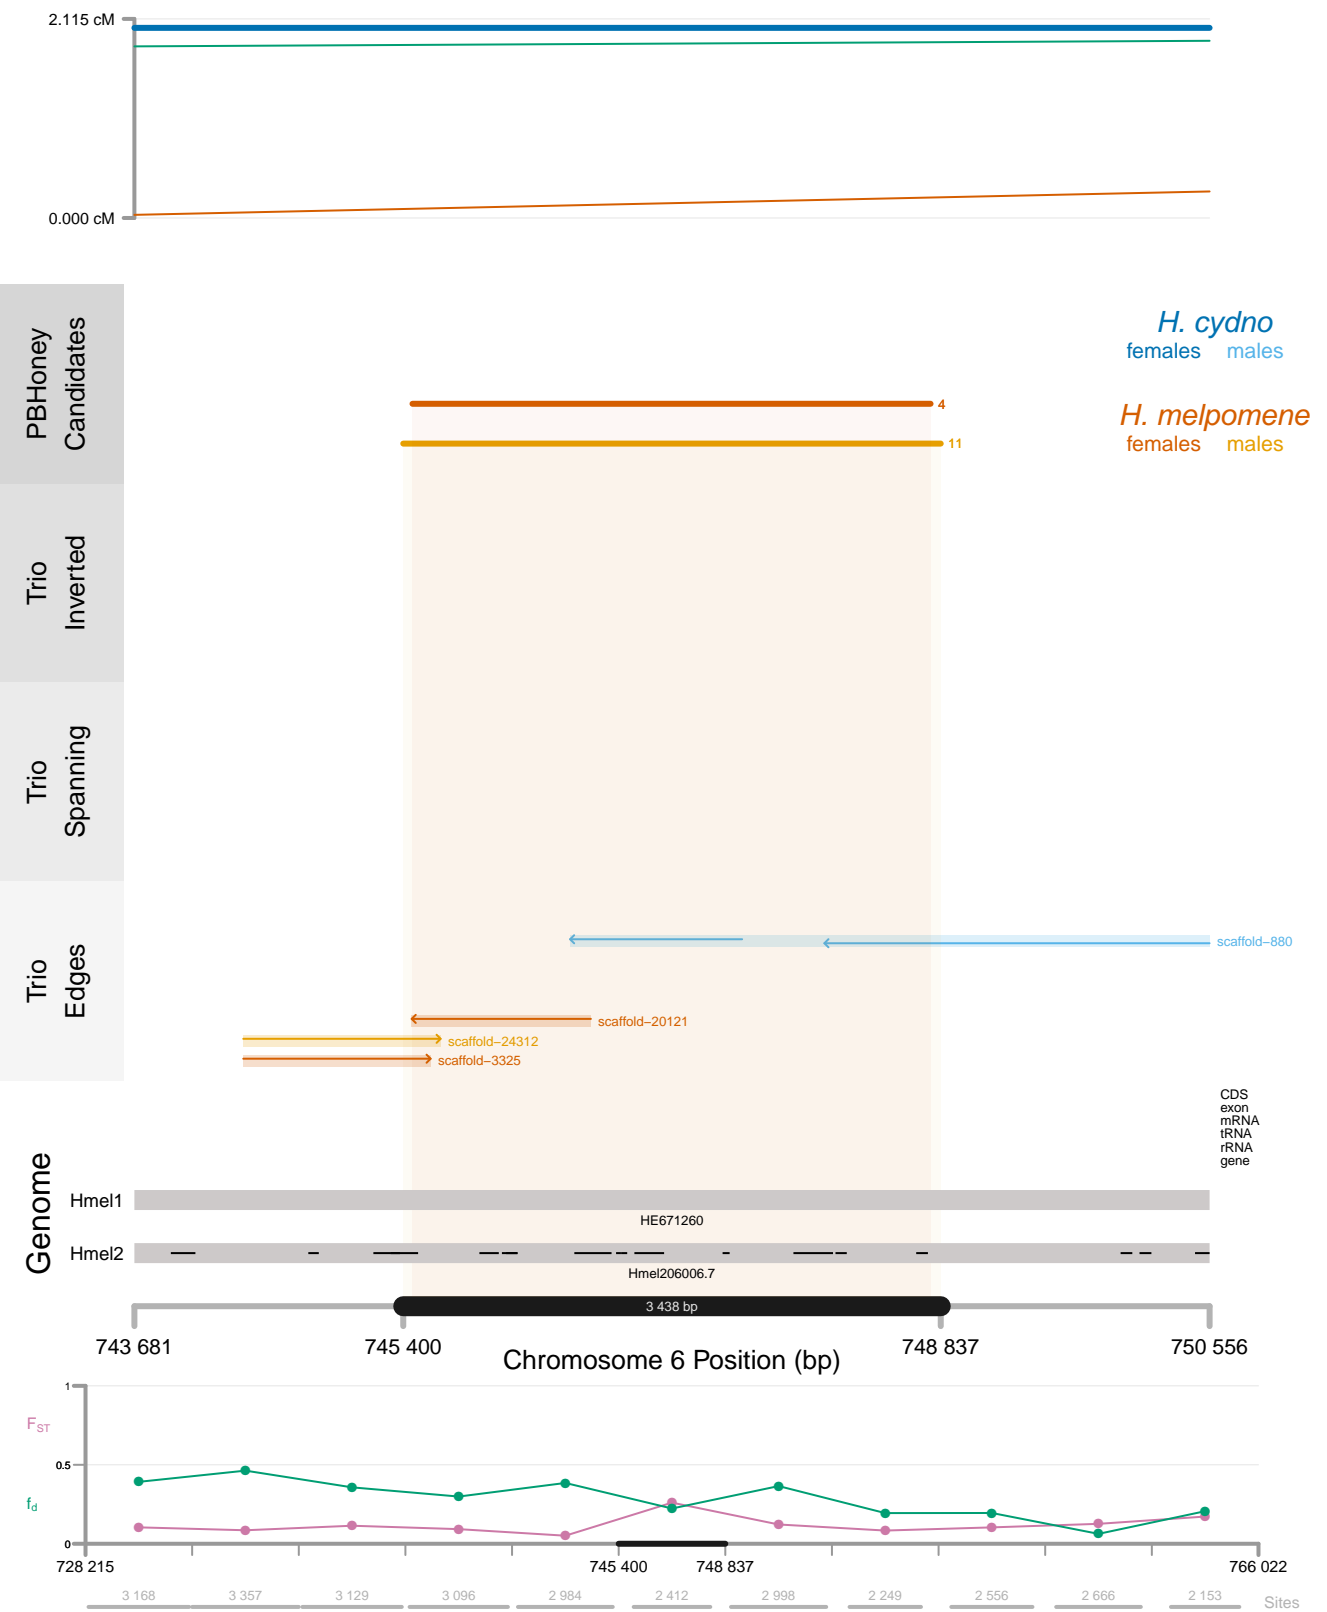

Figure S11.20

*H. melpomene*

Split reads only

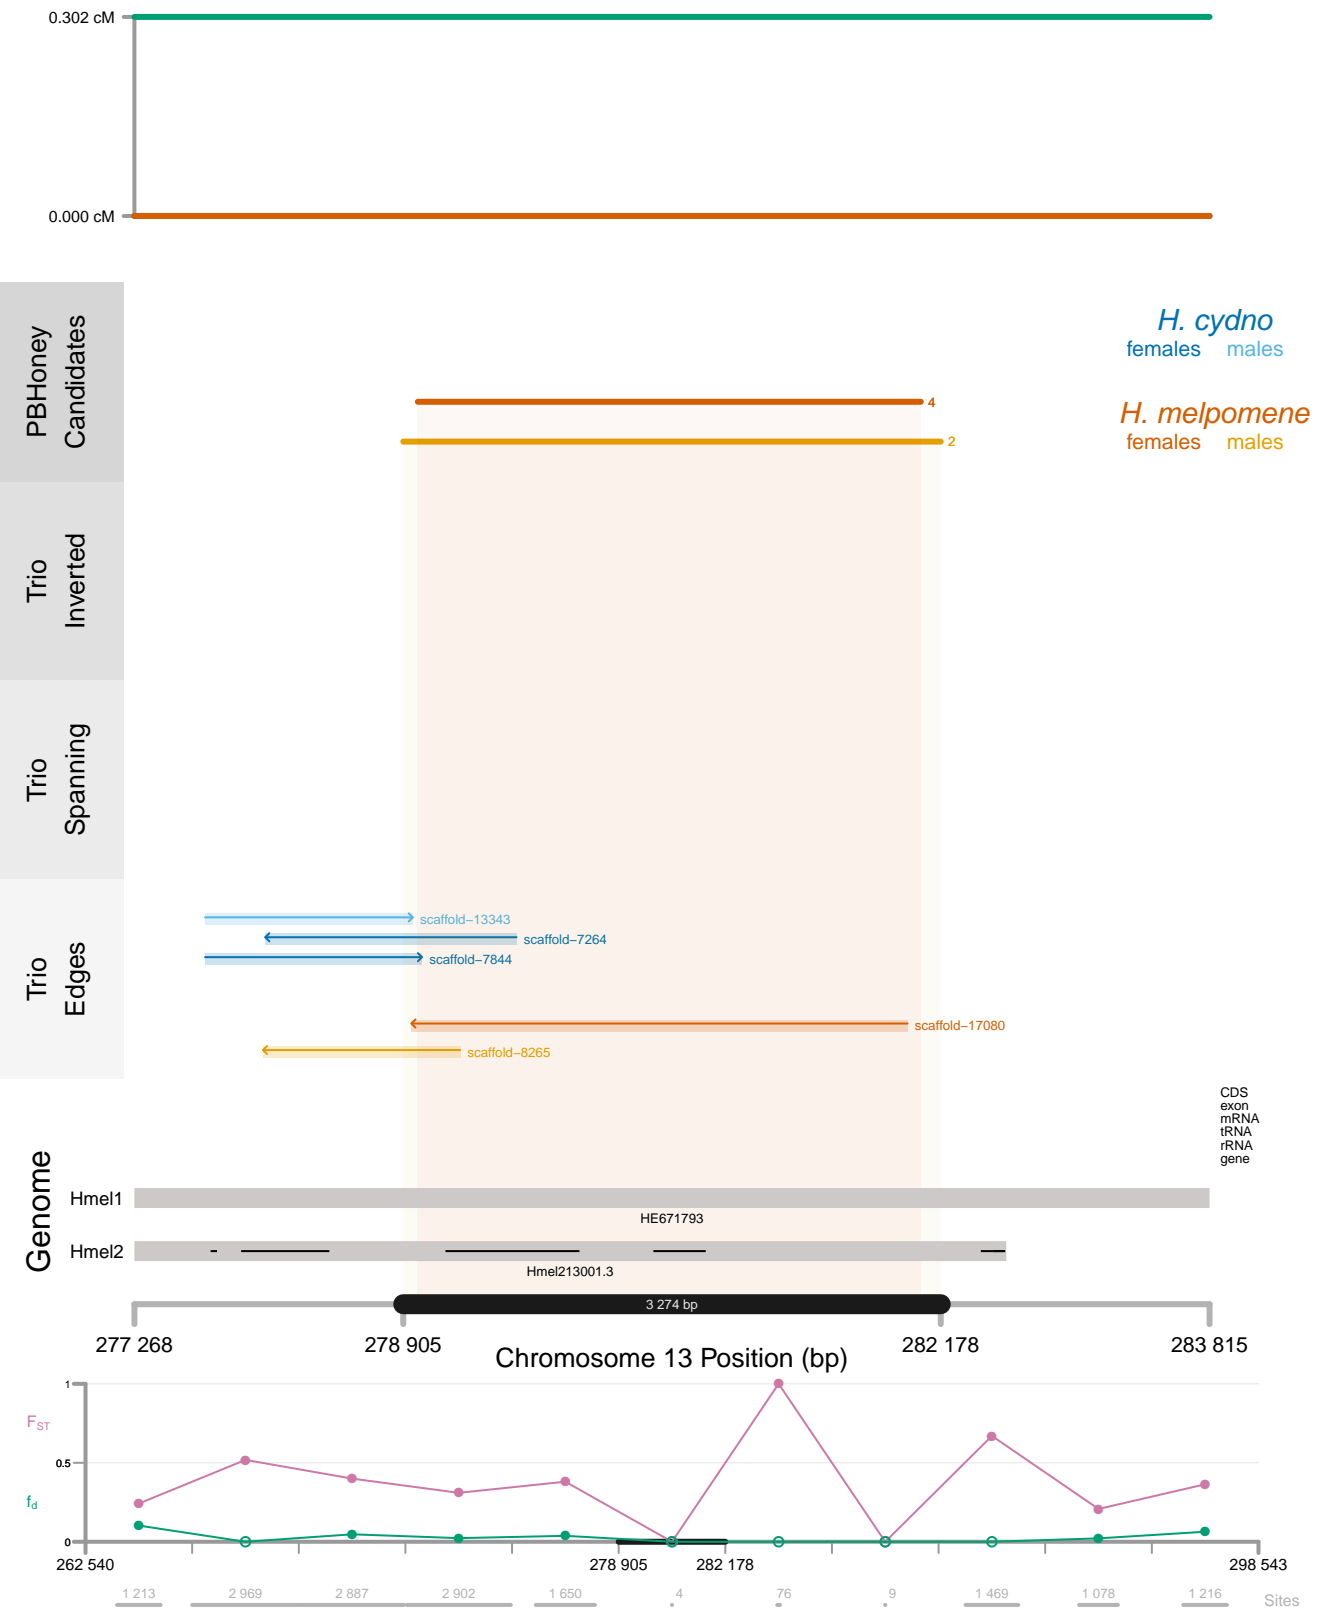

Figure S11.21

*H. melpomene*

Split reads only

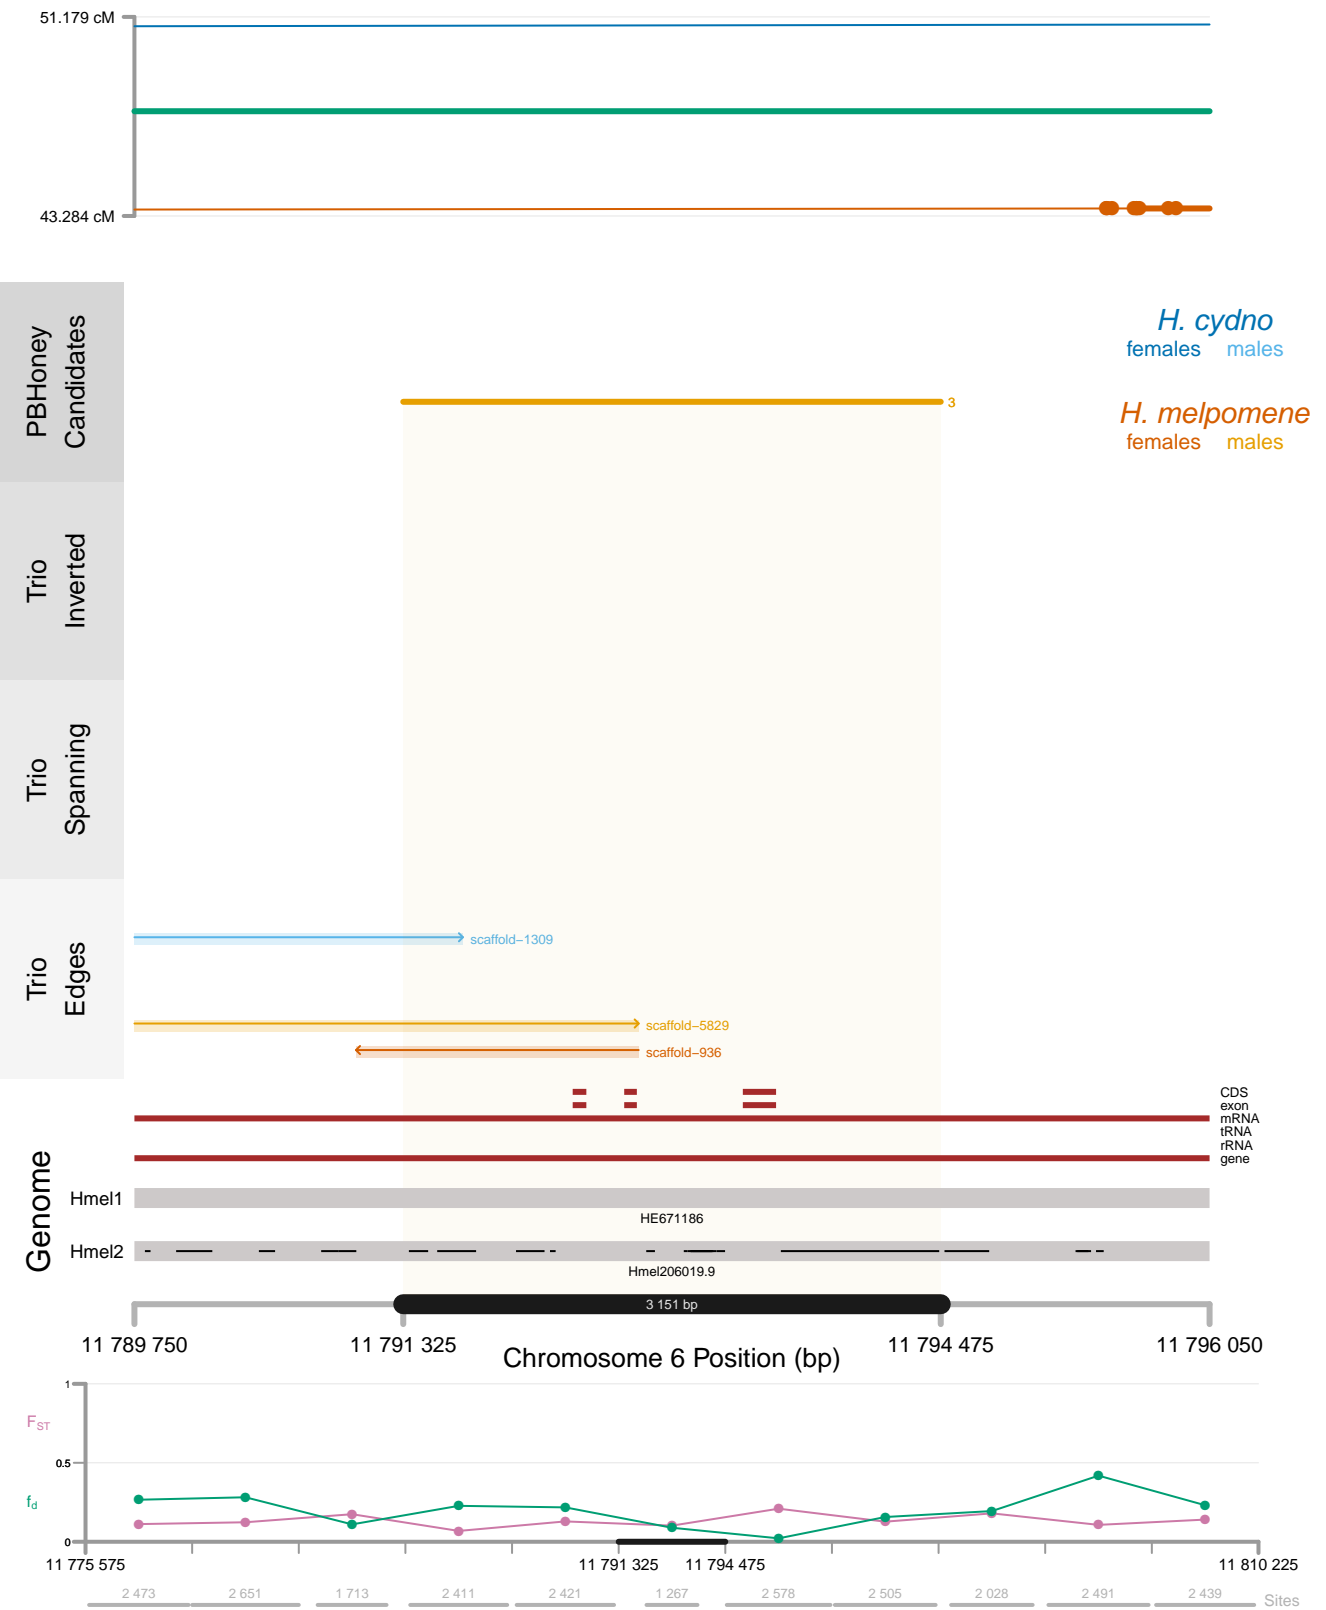

Figure S11.22

*H. melpomene*

Split reads only

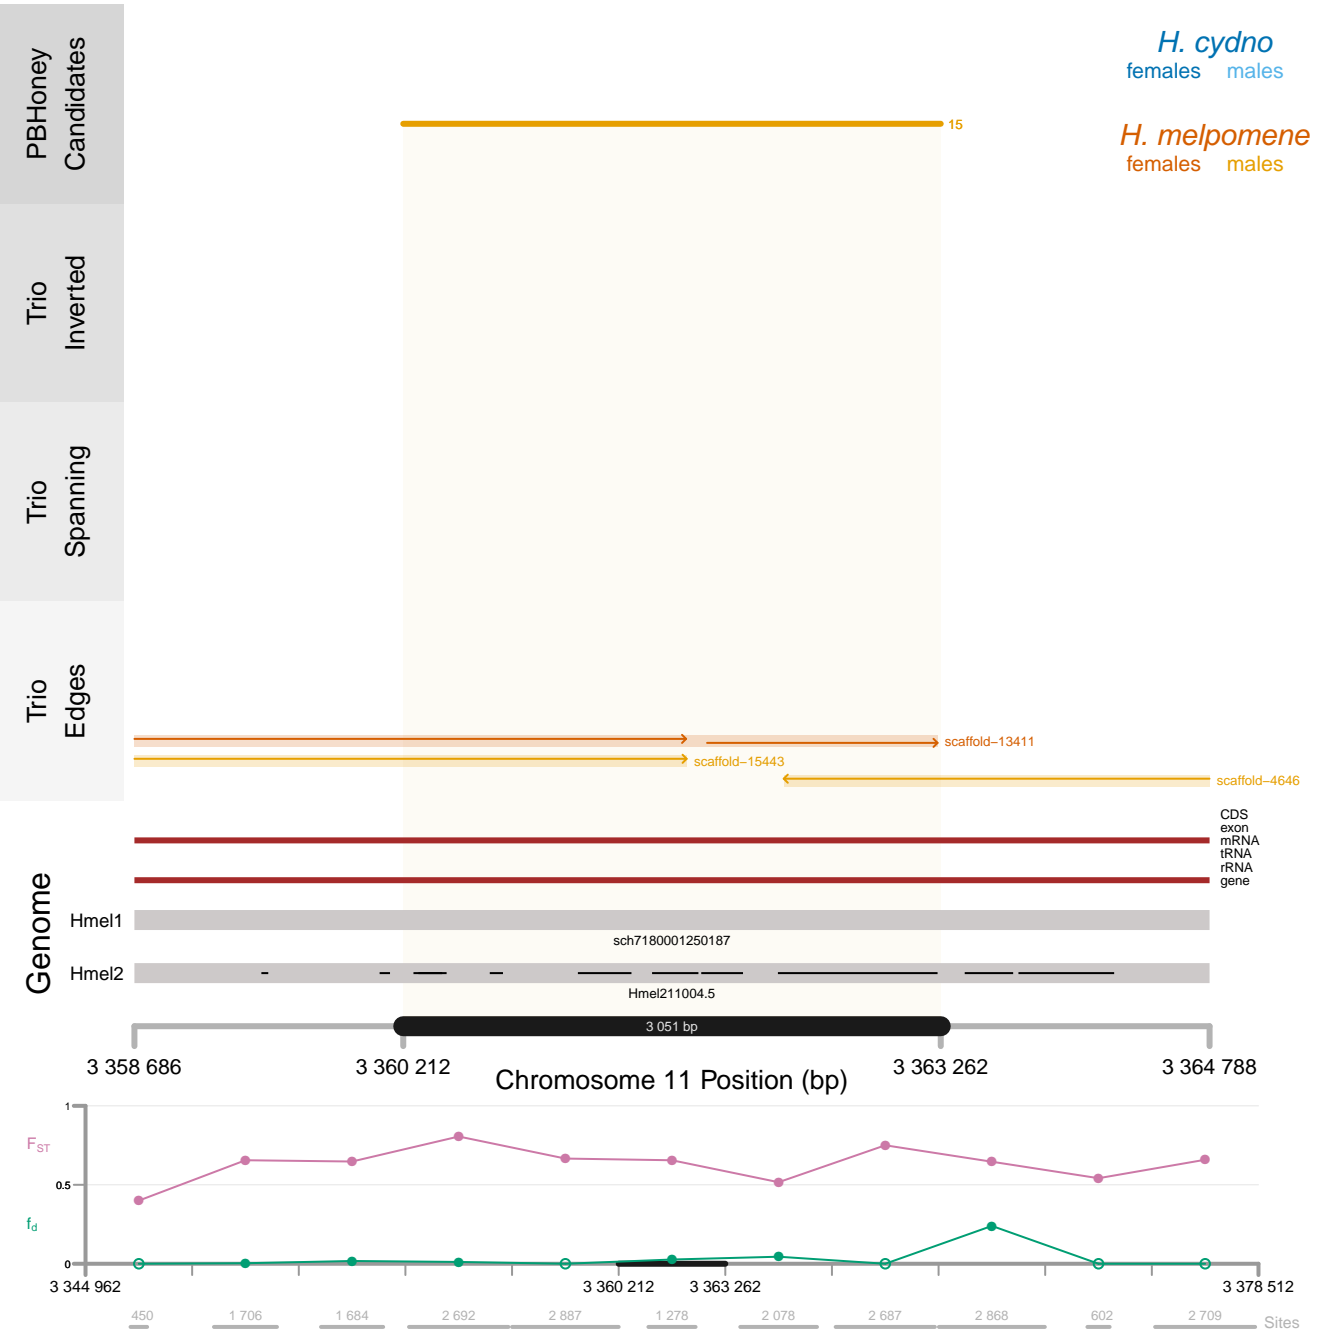

Figure S11.23

*H. melpomene*

Split reads only

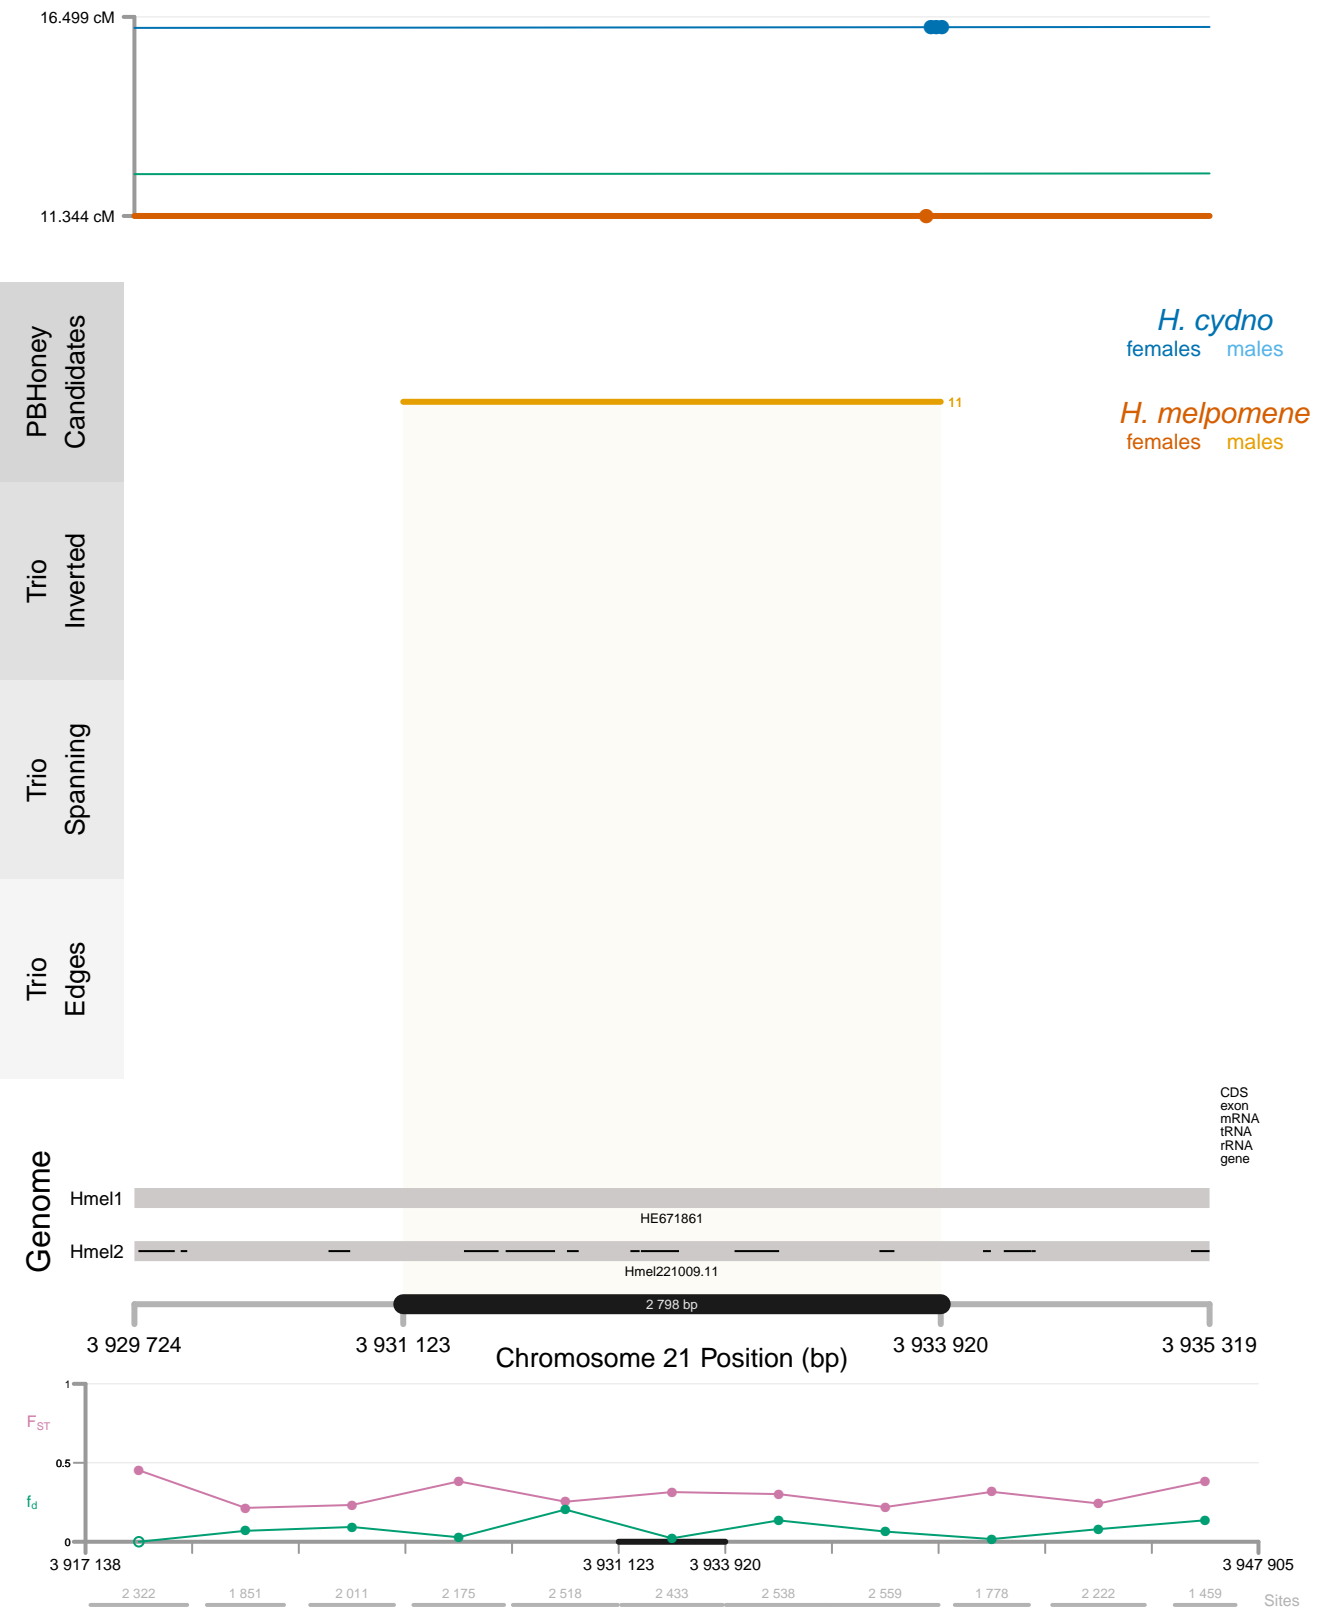

Figure S11.24

*H. melpomene*

Split reads only

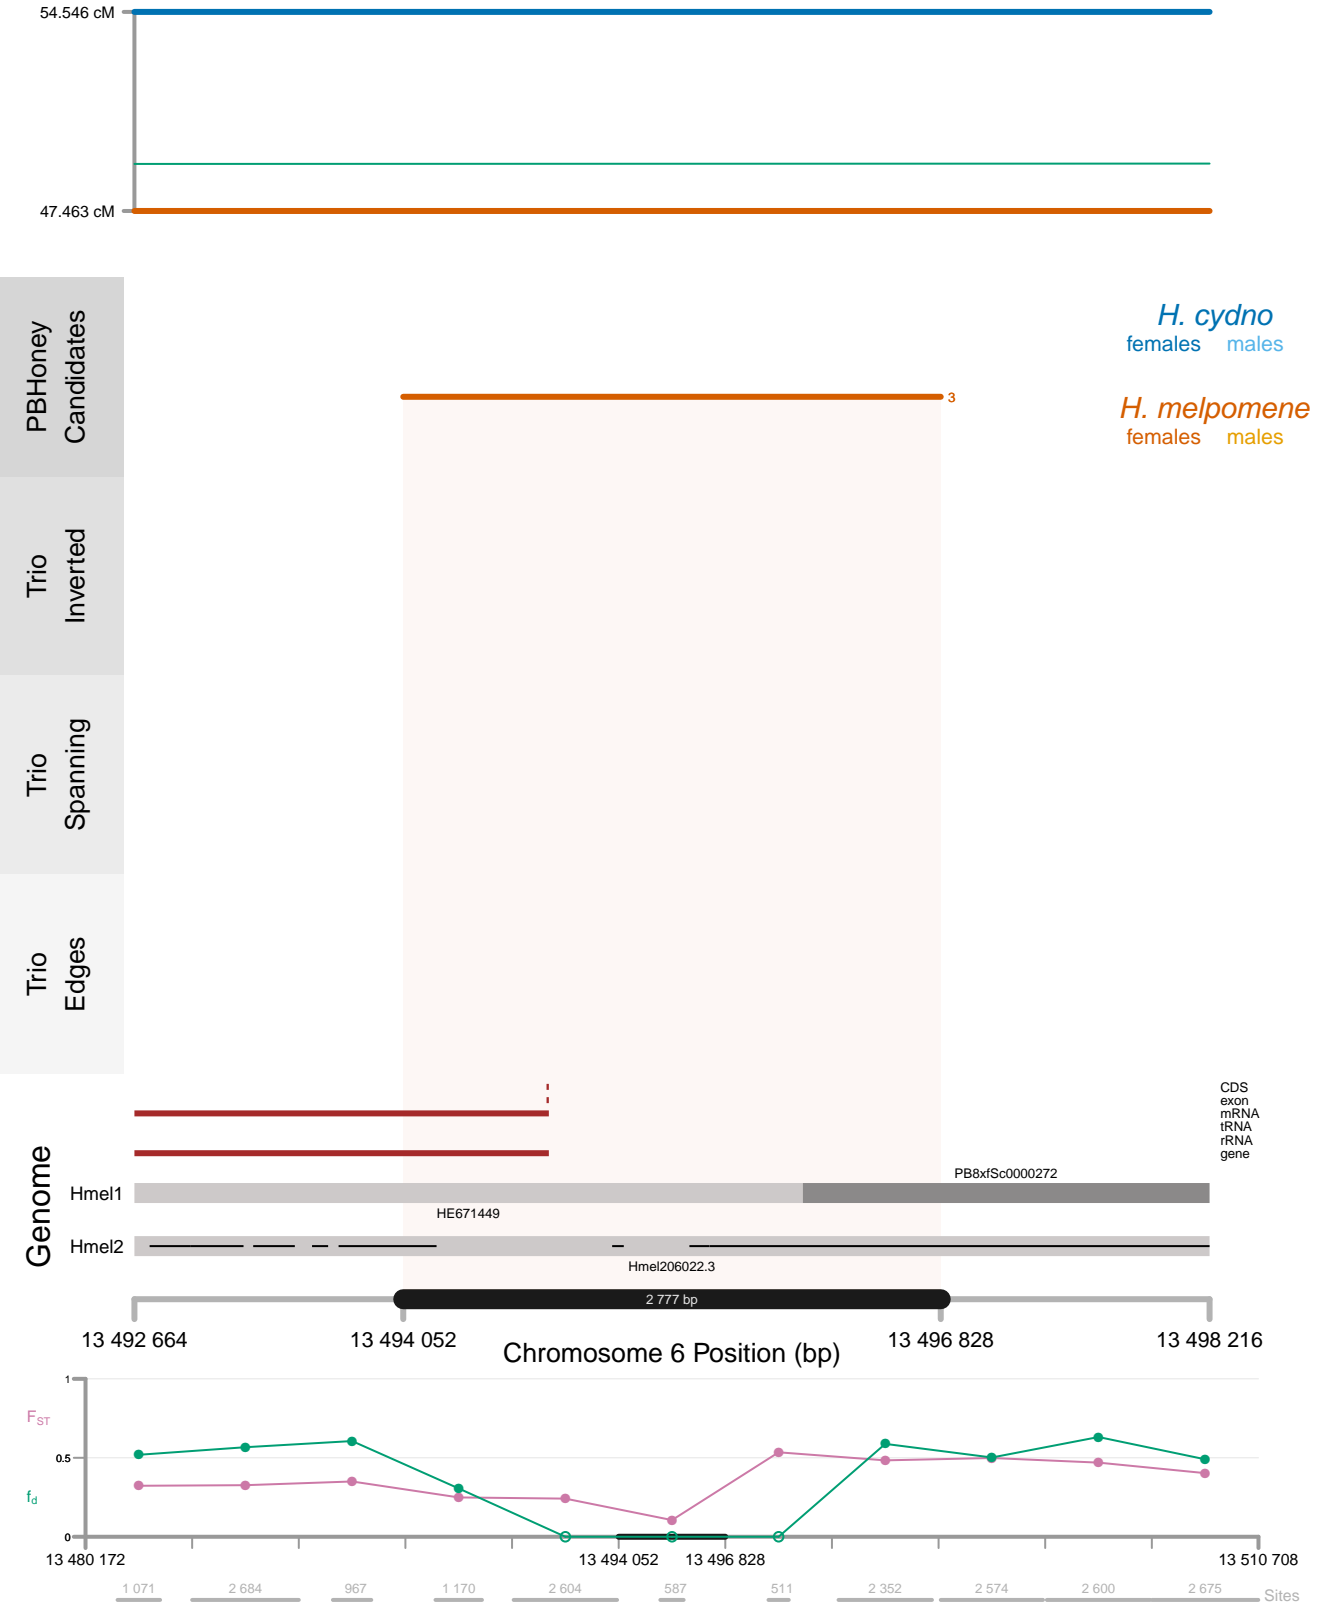



Figure S11.25

*H. melpomene*

Split reads only

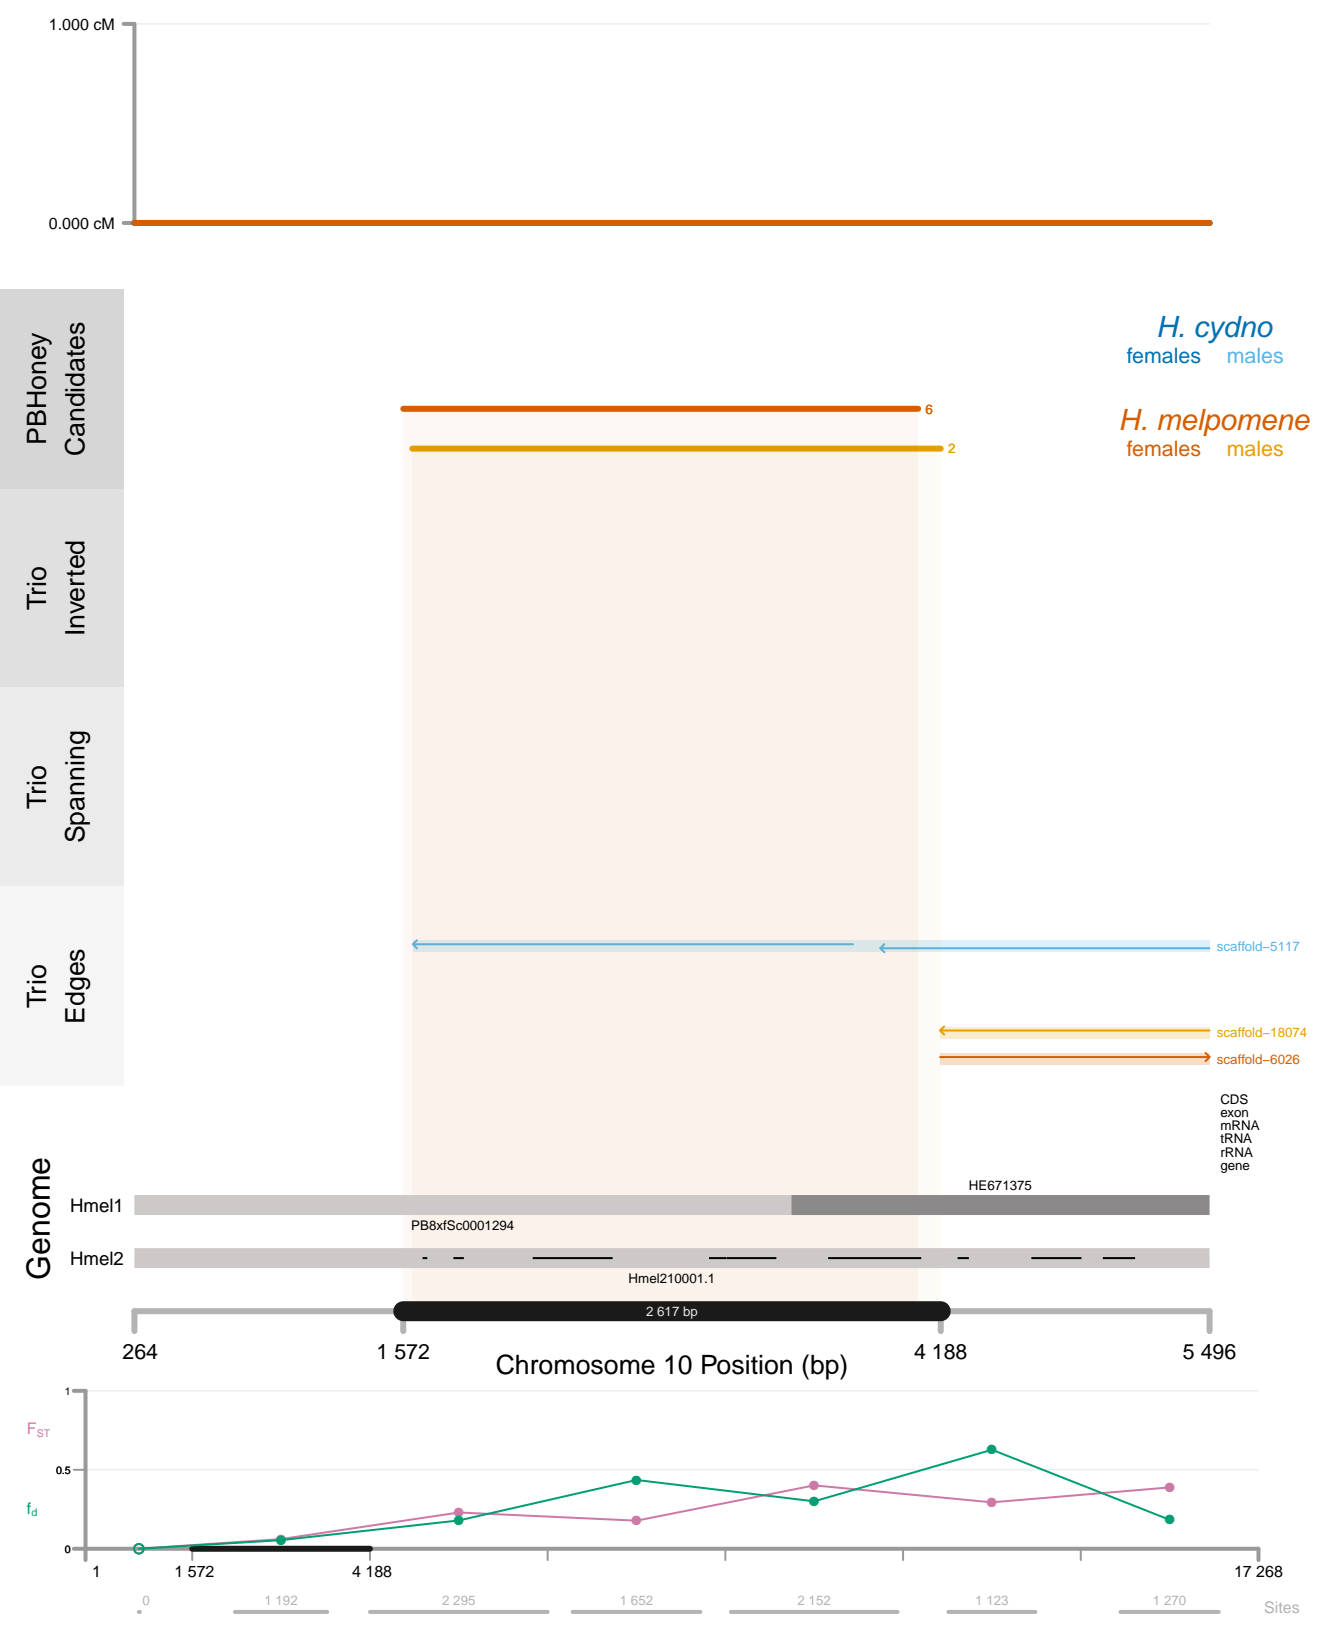

Figure S11.26

*H. melpomene*

Split reads only

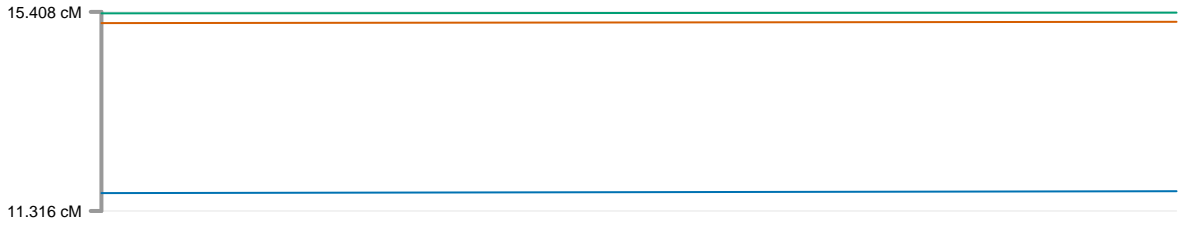

PBHoney  
Candidates

*H. cydno*  
females males

*H. melpomene*  
females males

Trio  
Inverted

Trio  
Spanning

Trio  
Edges

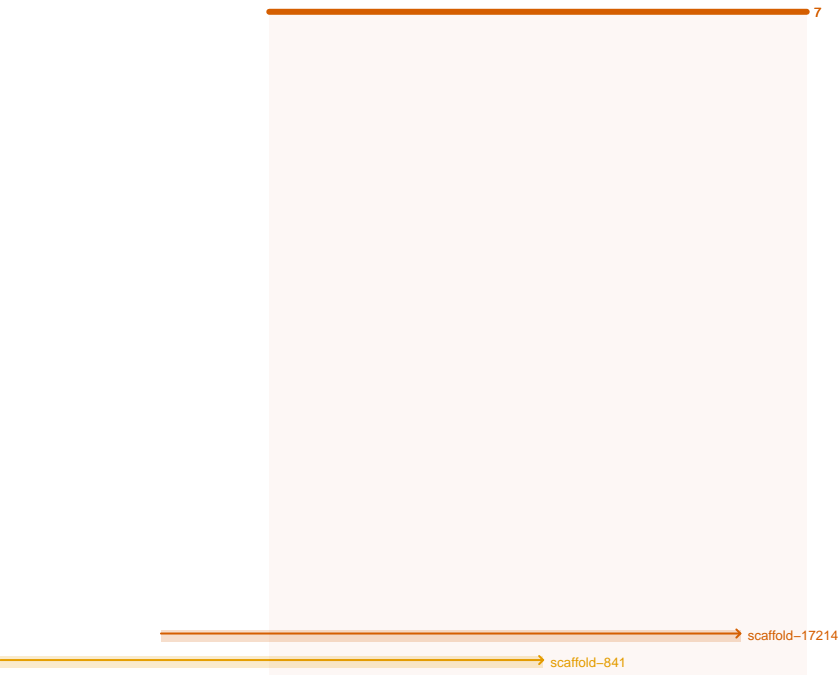

Genome

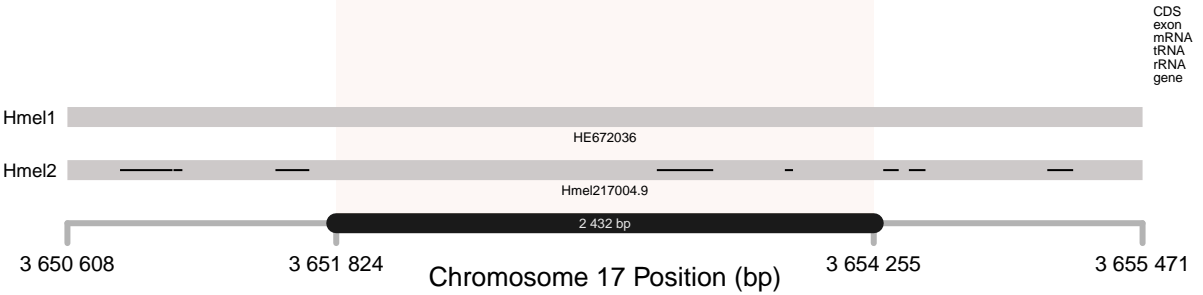

CDS  
exon  
mRNA  
tRNA  
rRNA  
gene

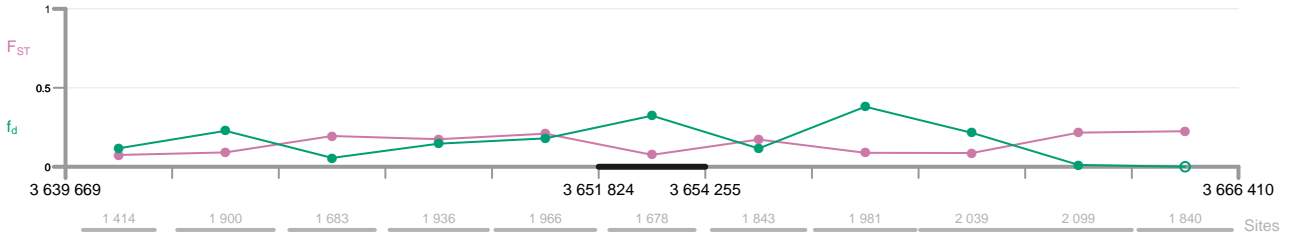

Figure S11.27

*H. melpomene*

Split reads only

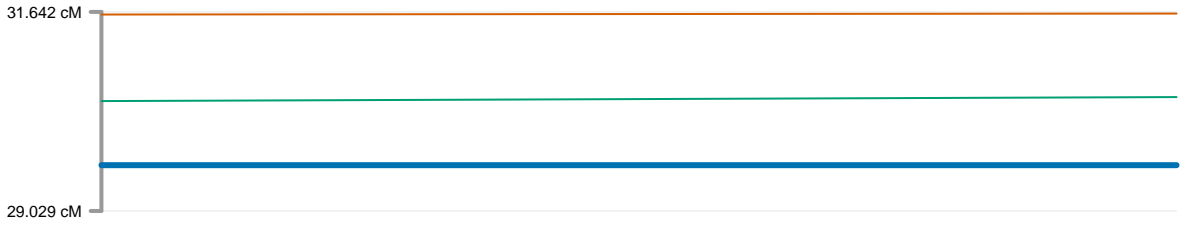

PBHoney Candidates  
Trio Inverted  
Trio Spanning  
Trio Edges

*H. cydno*  
females males  
*H. melpomene*  
females males

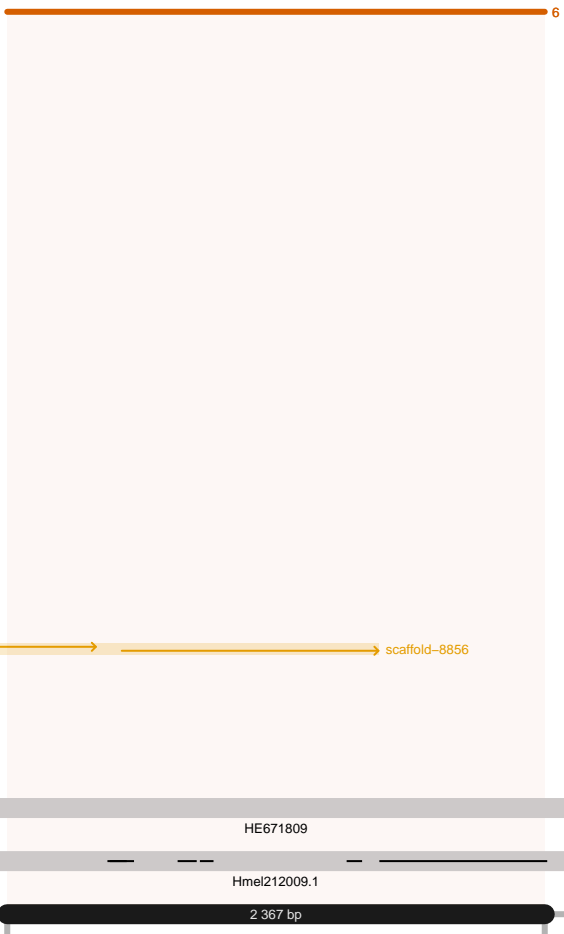

Genome

CDS  
exon  
mRNA  
tRNA  
rRNA  
gene

Chromosome 12 Position (bp)

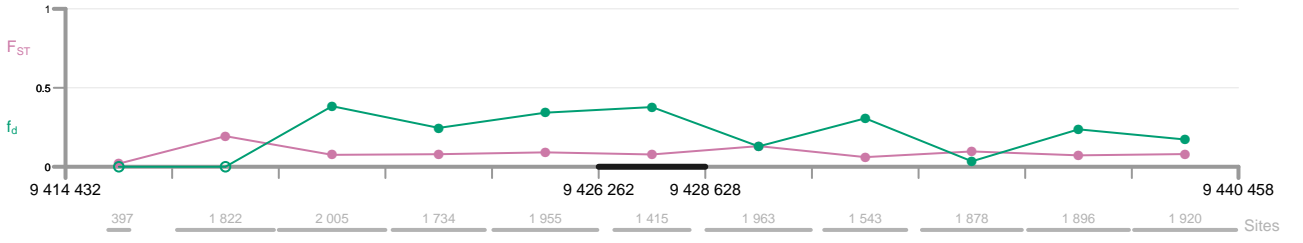

Figure S11.28

*H. melpomene*

Split reads only

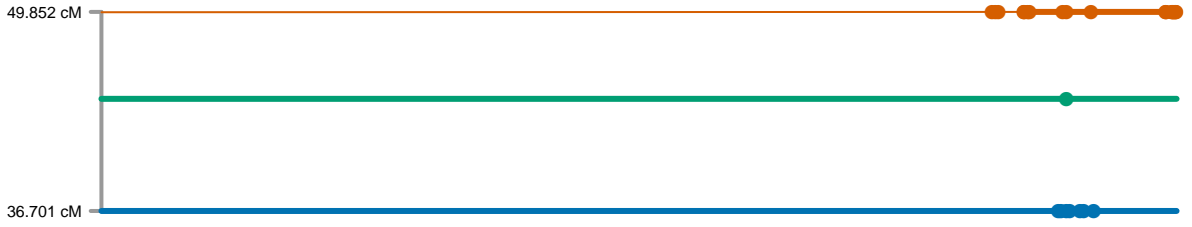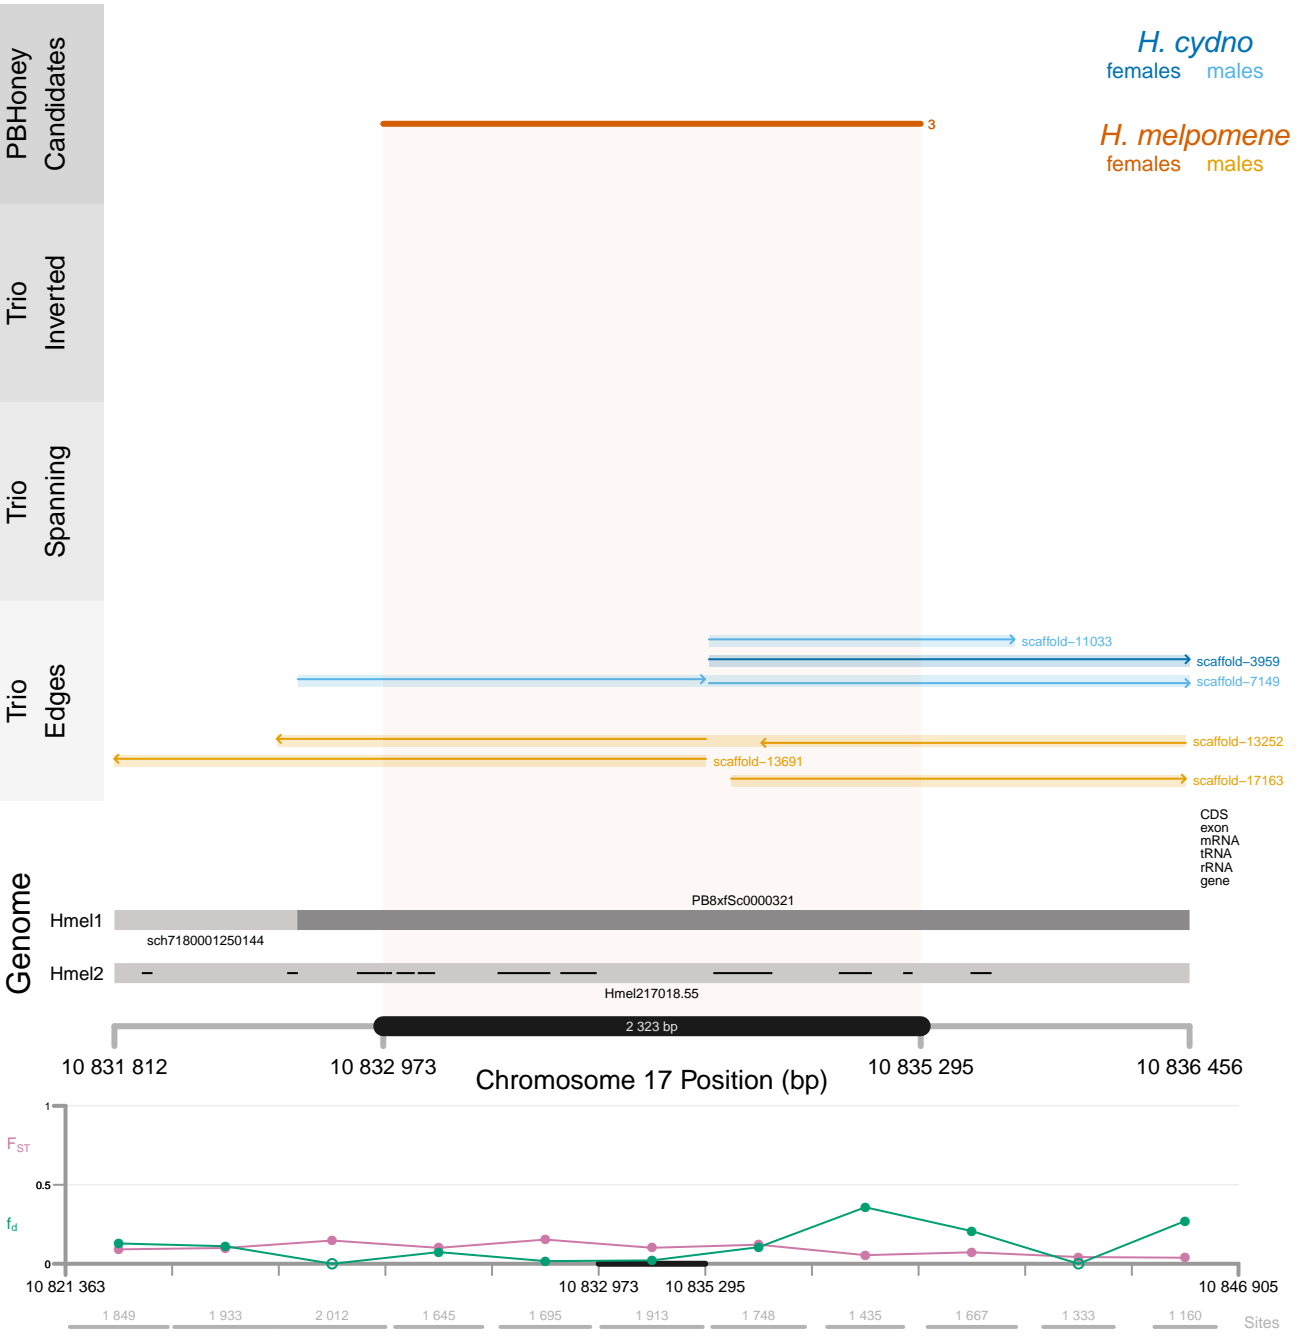

Figure S11.29

*H. melpomene*

Split reads only

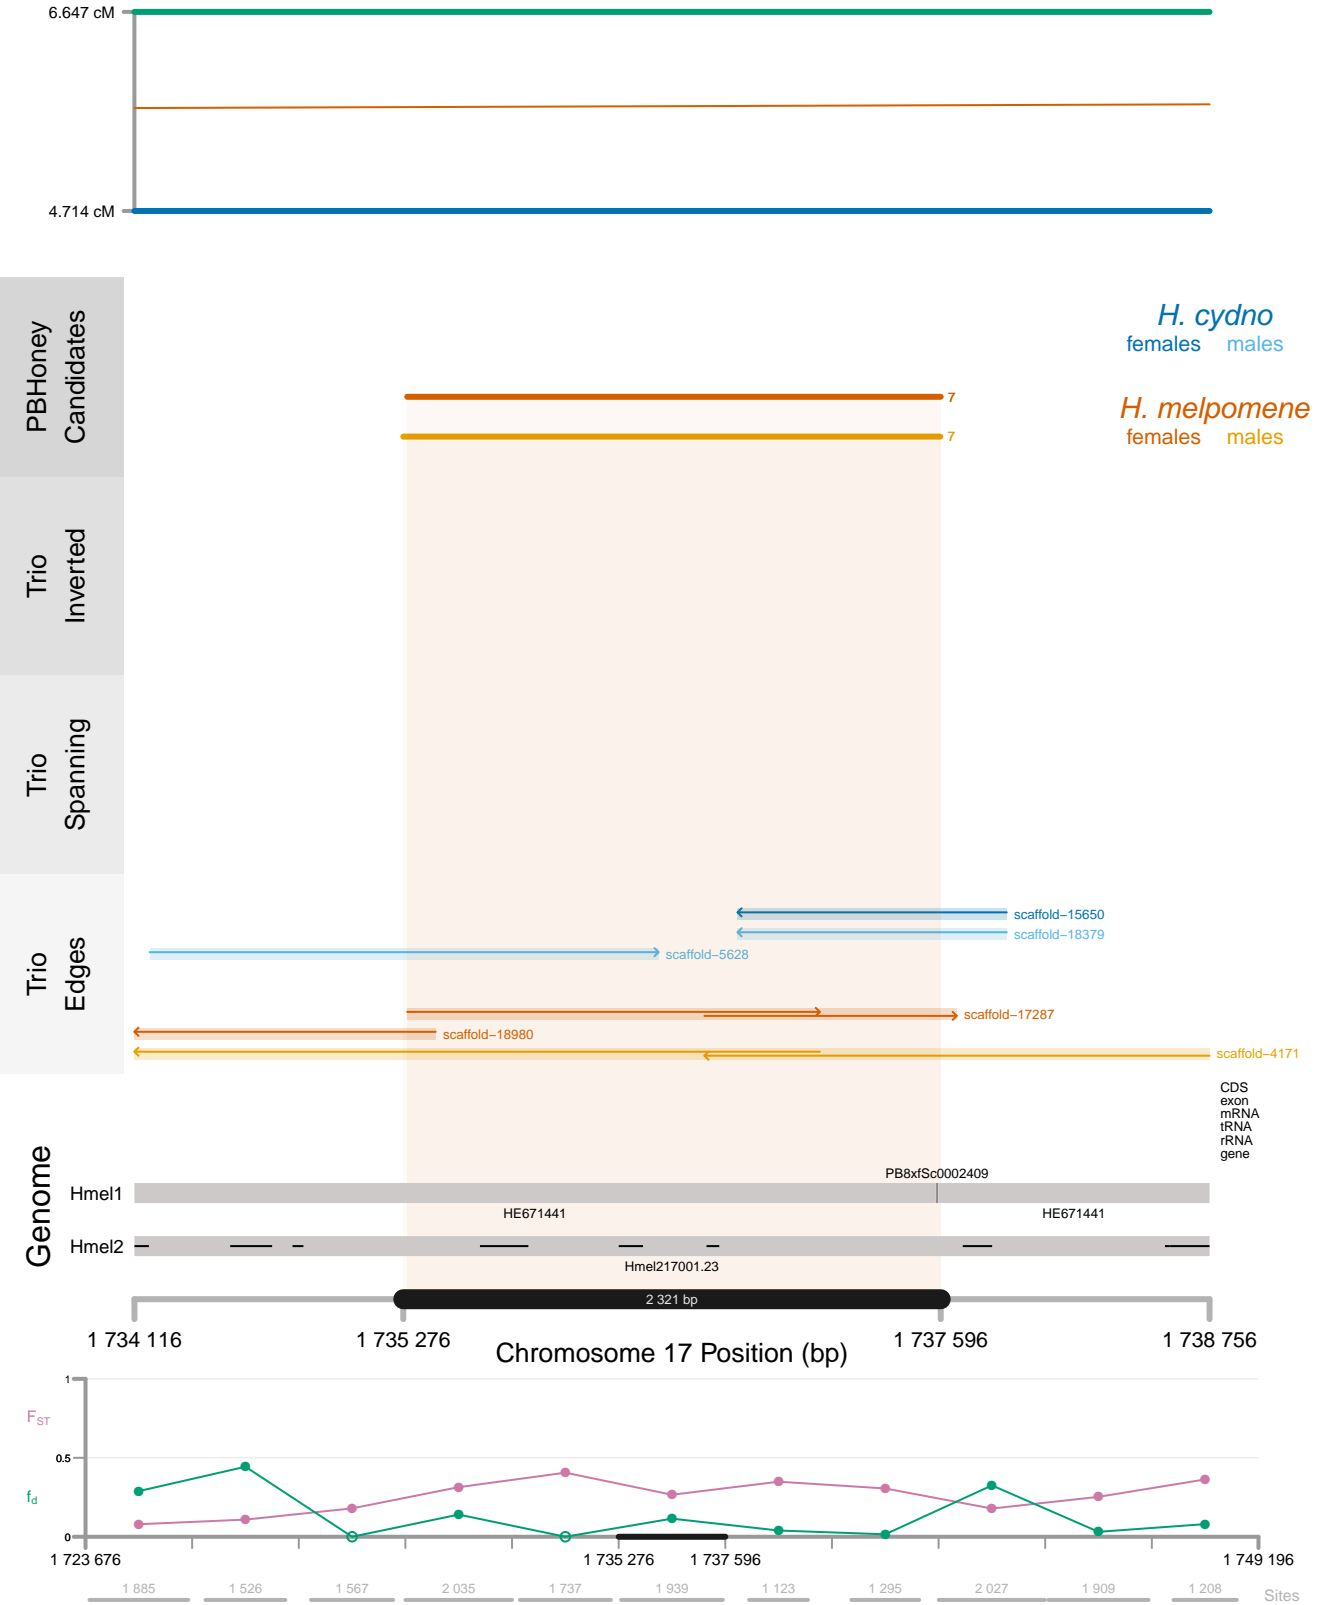

Figure S11.30

*H. melpomene*

Split reads only

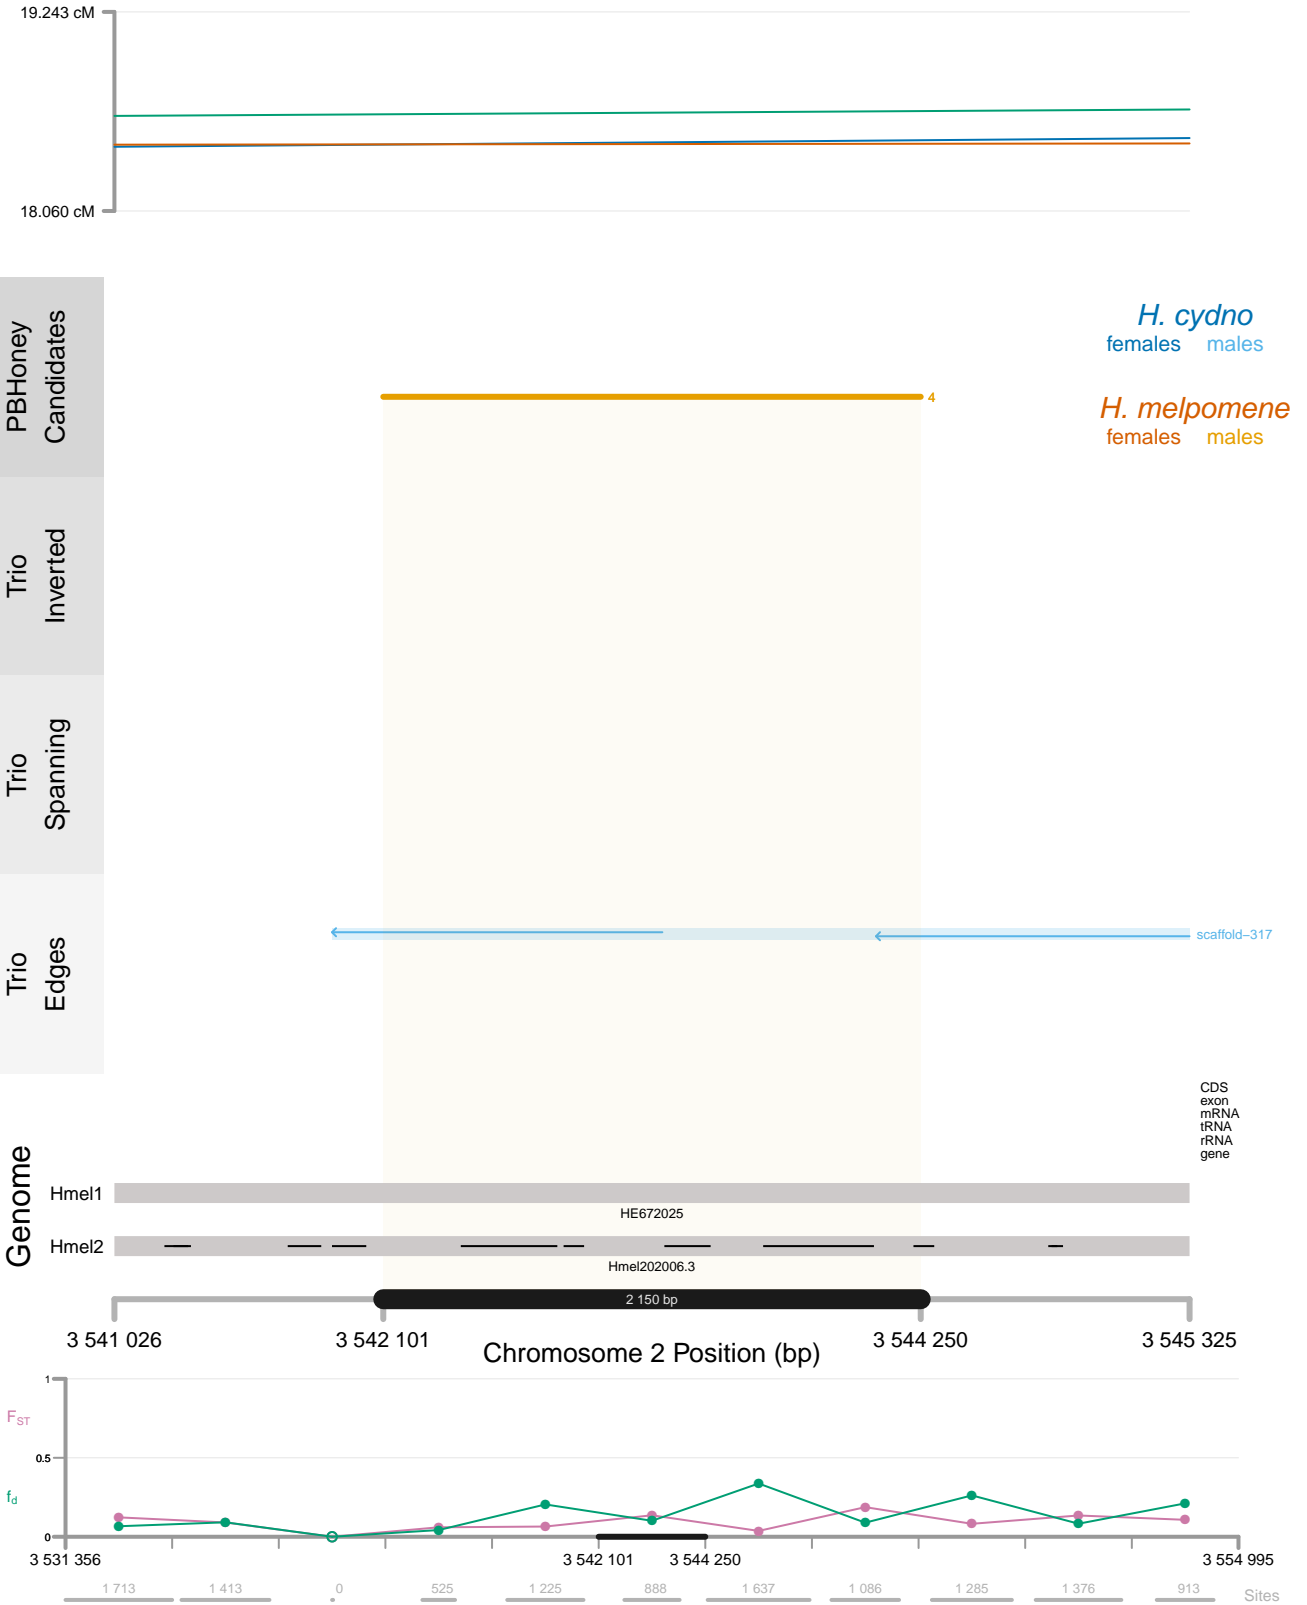

Figure S11.31

*H. melpomene*

Split reads only

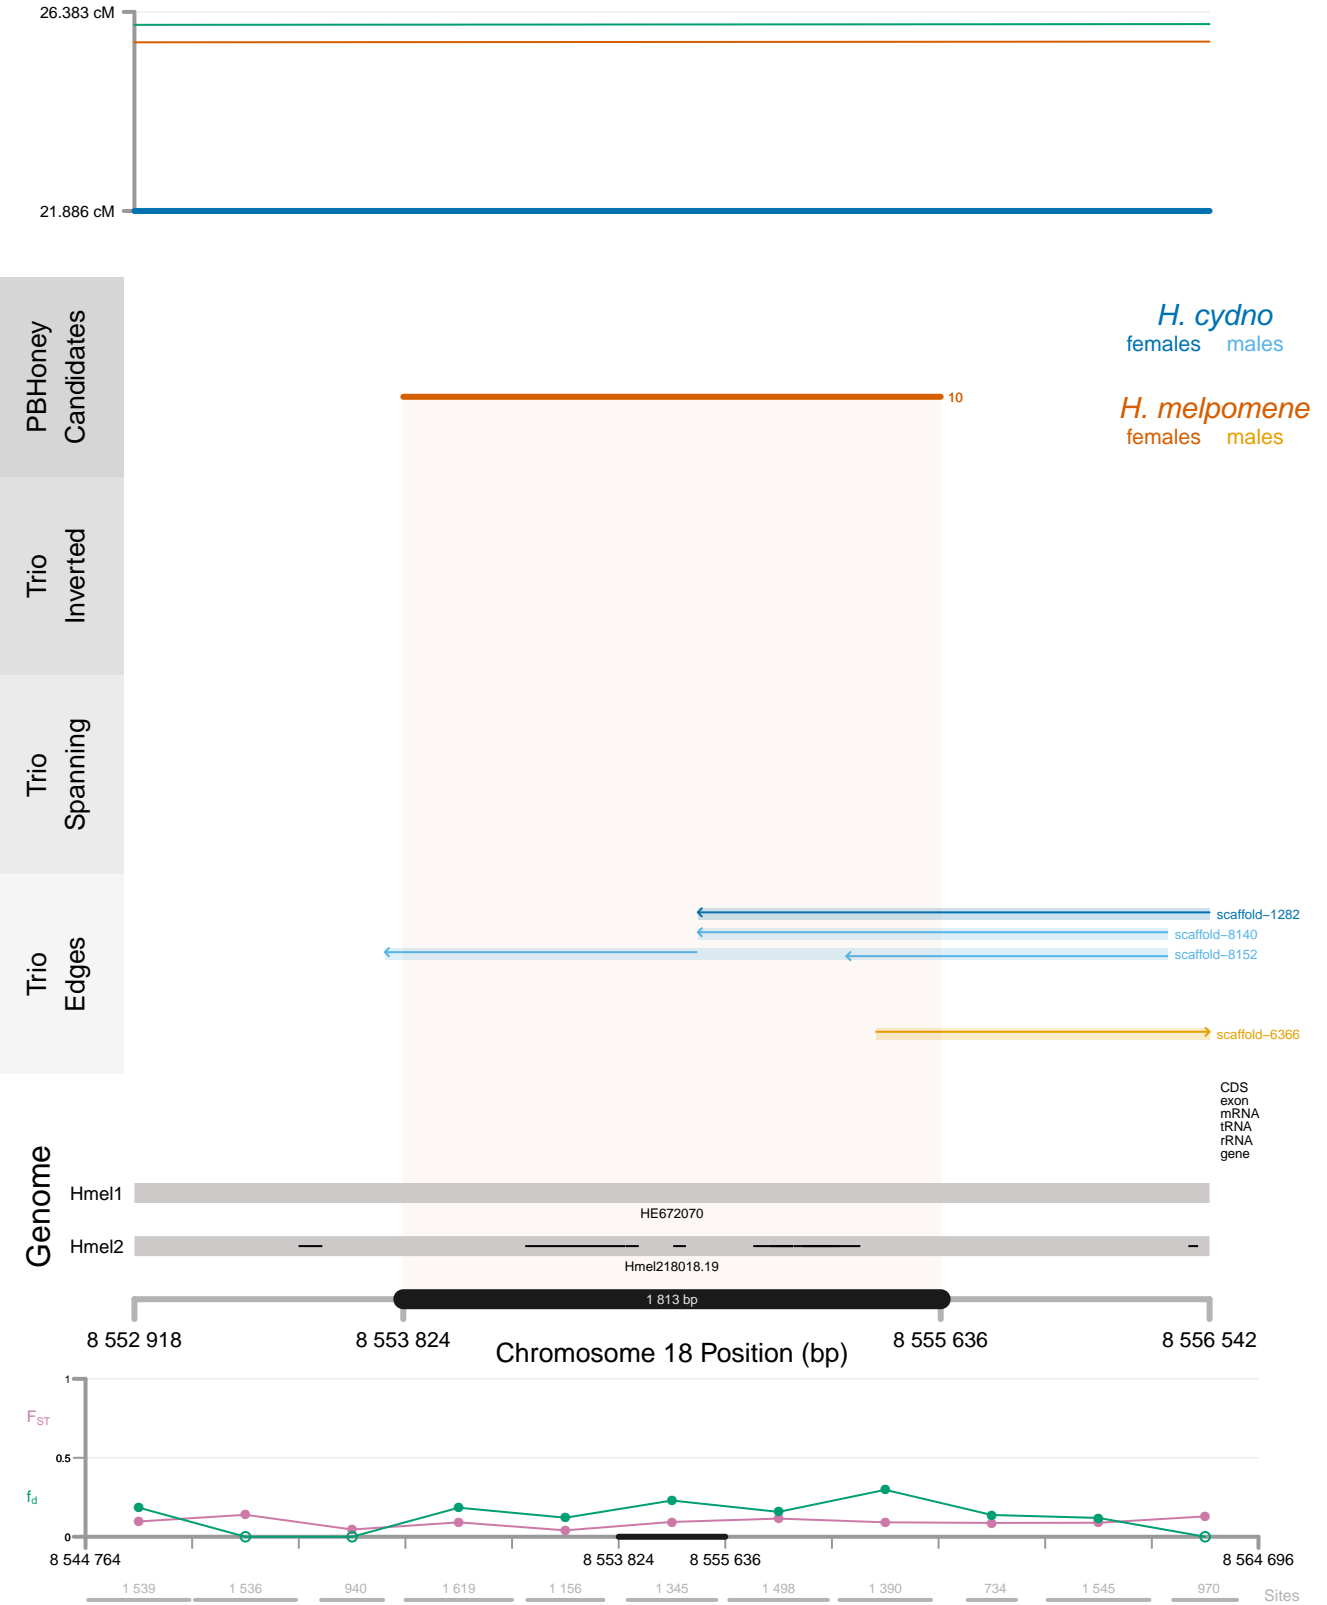

PBHoney Candidates

Trio Inverted

Trio Spanning

Trio Edges

*H. cydno*  
females males

*H. melpomene*  
females males

Genome

CDS  
exon  
mRNA  
tRNA  
rRNA  
gene

Chromosome 18 Position (bp)

$F_{ST}$

$f_d$

Sites

Figure S11.32

*H. melpomene*

Split reads only

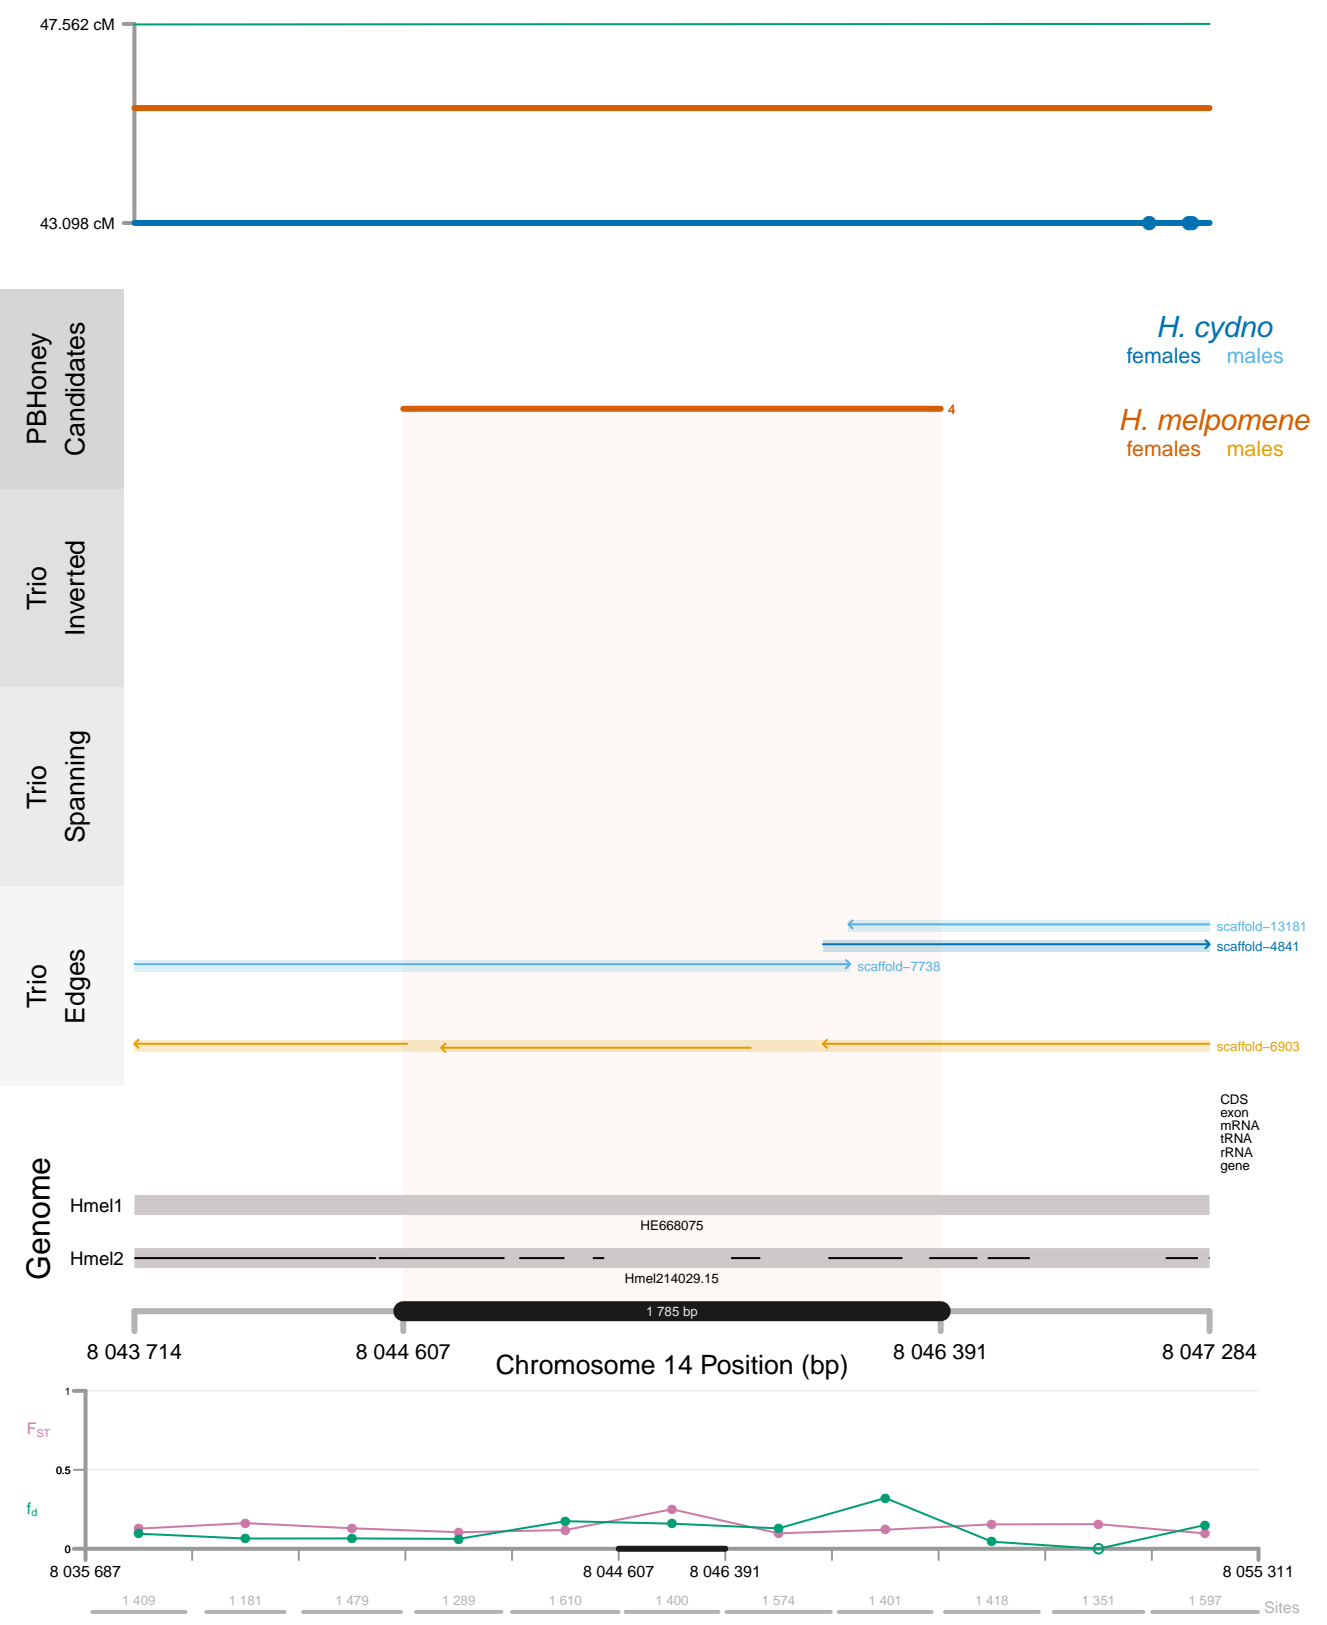



Figure S11.33

*H. melpomene*

Split reads only

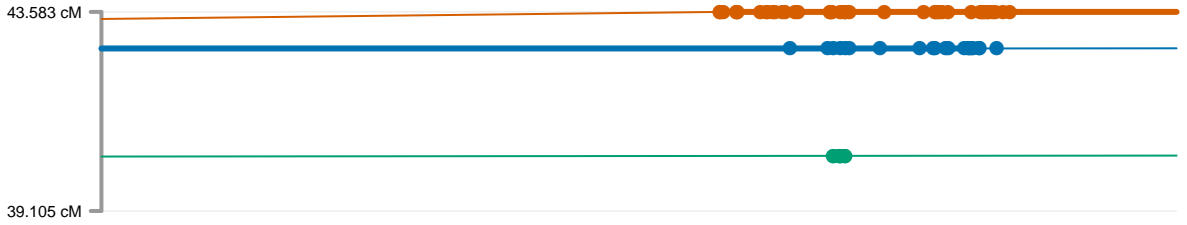

PBHoney  
Candidates

Trio  
Inverted

Trio  
Spanning

Trio  
Edges

*H. cydno*  
females males

*H. melpomene*  
females males

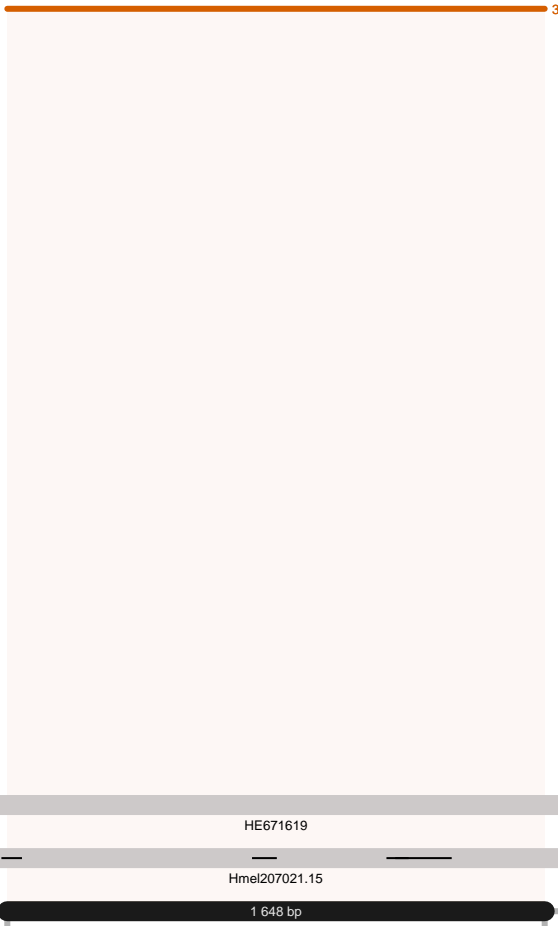

Genome

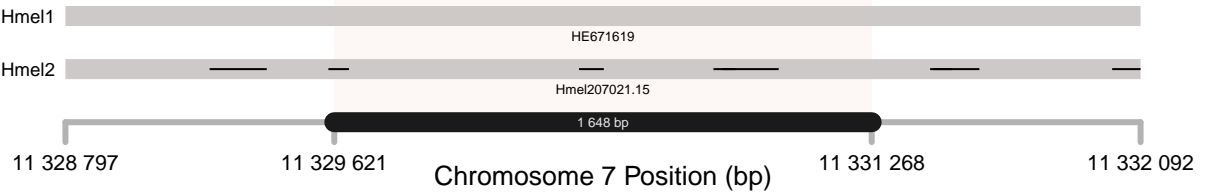

CDS  
exon  
mRNA  
tRNA  
rRNA  
gene

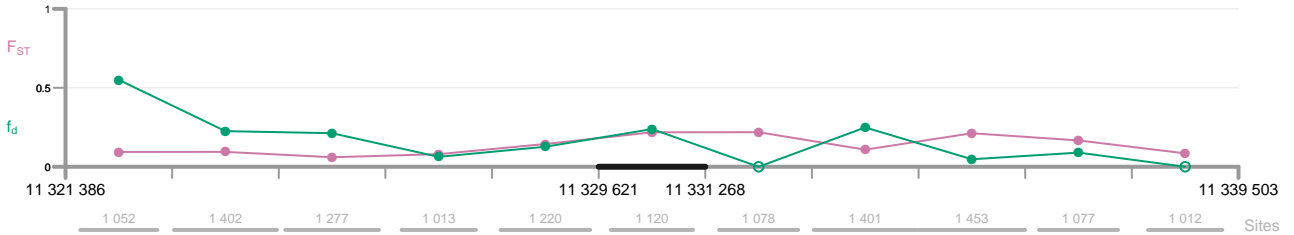

Figure S11.34

*H. melpomene*

Split reads only

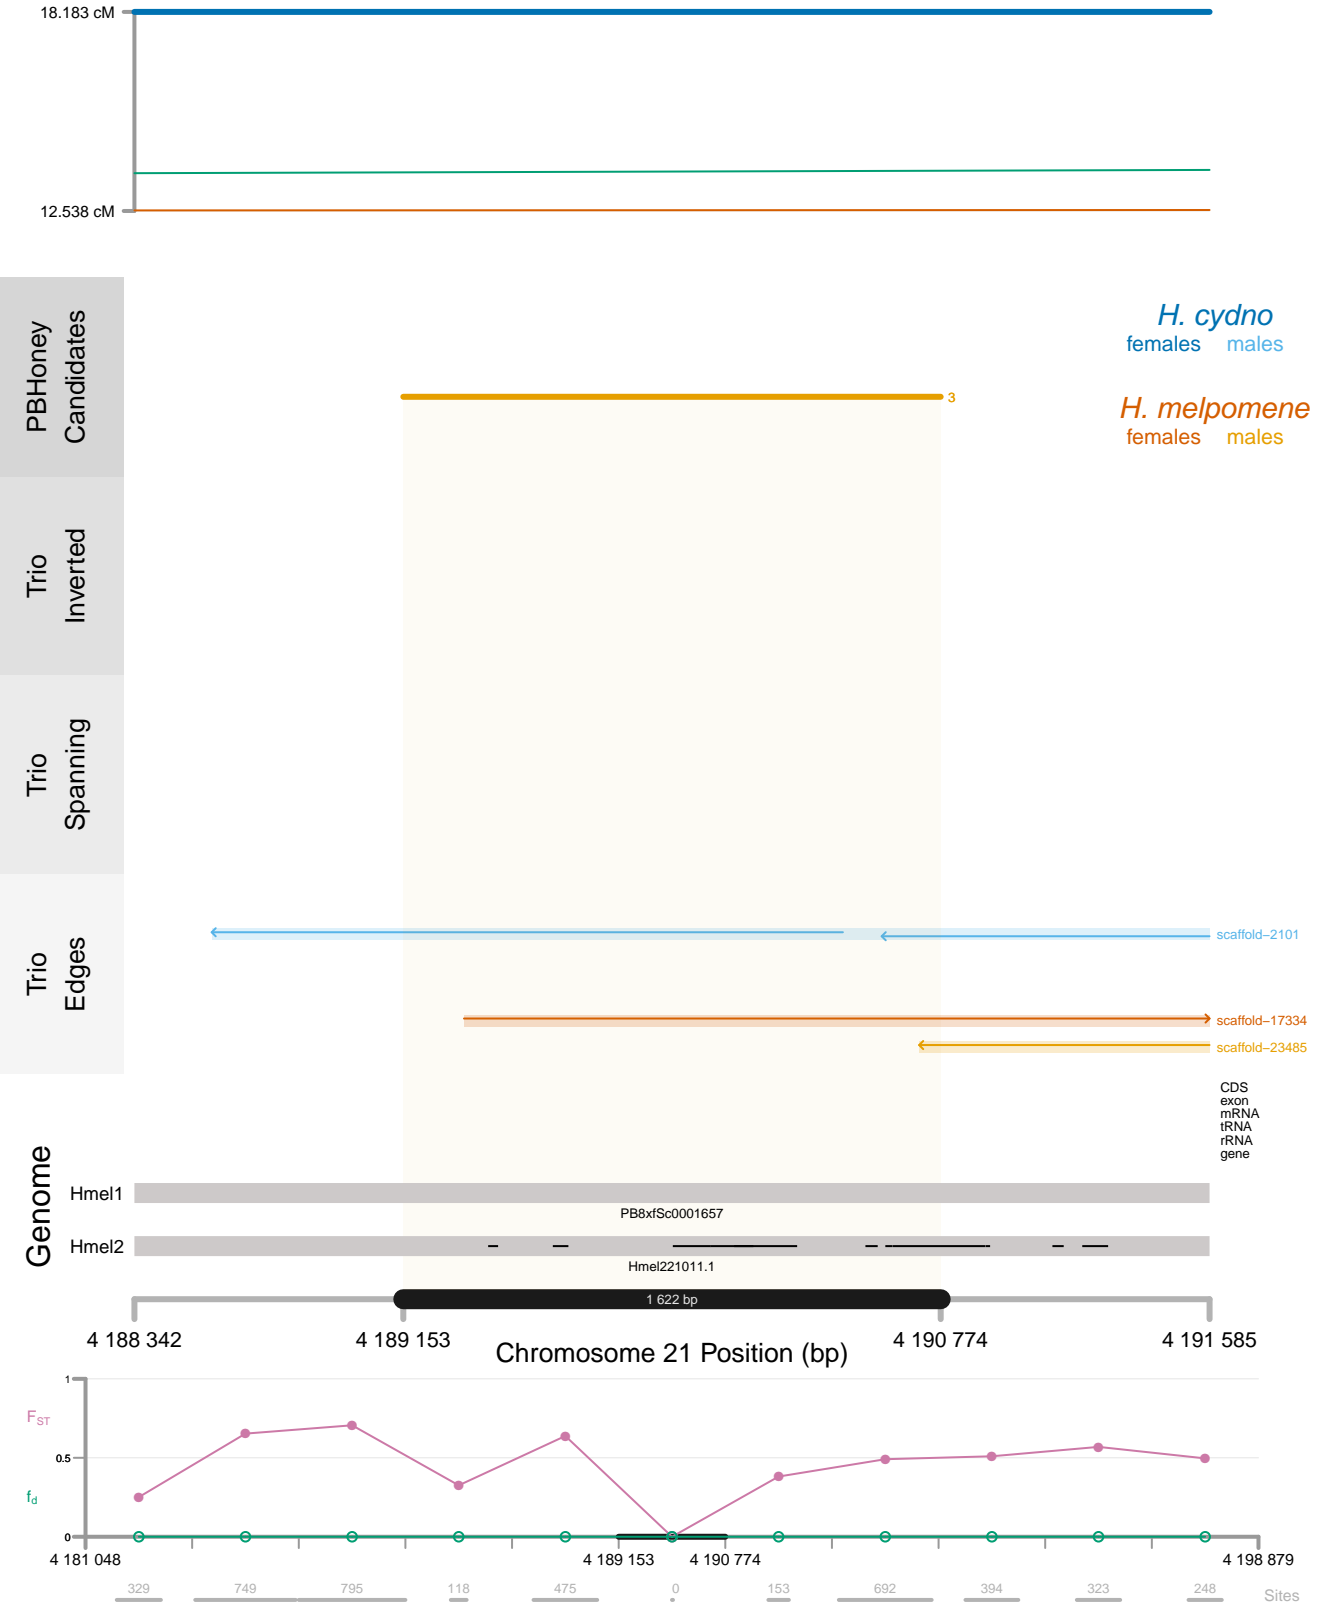

Figure S11.35

*H. melpomene*

Split reads only

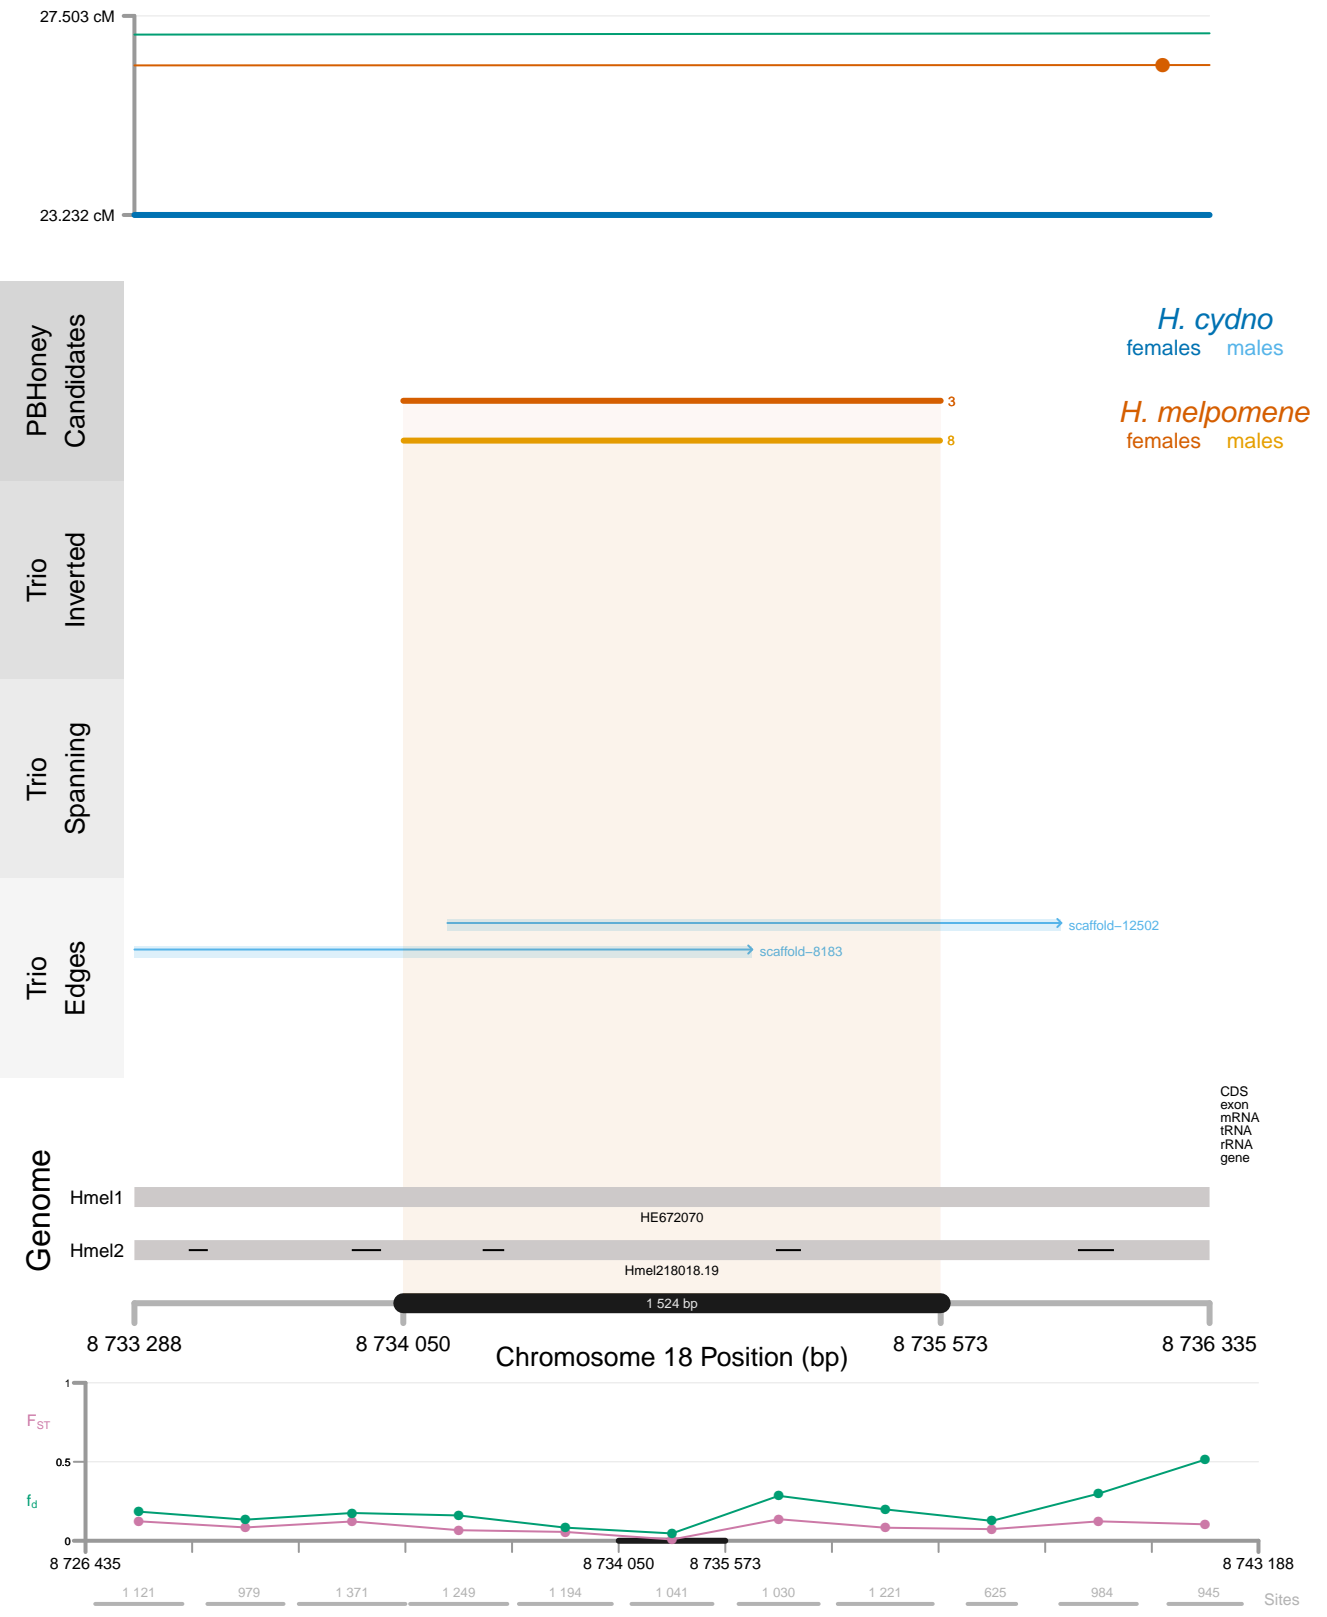

Figure S11.36

*H. melpomene*

Split reads only

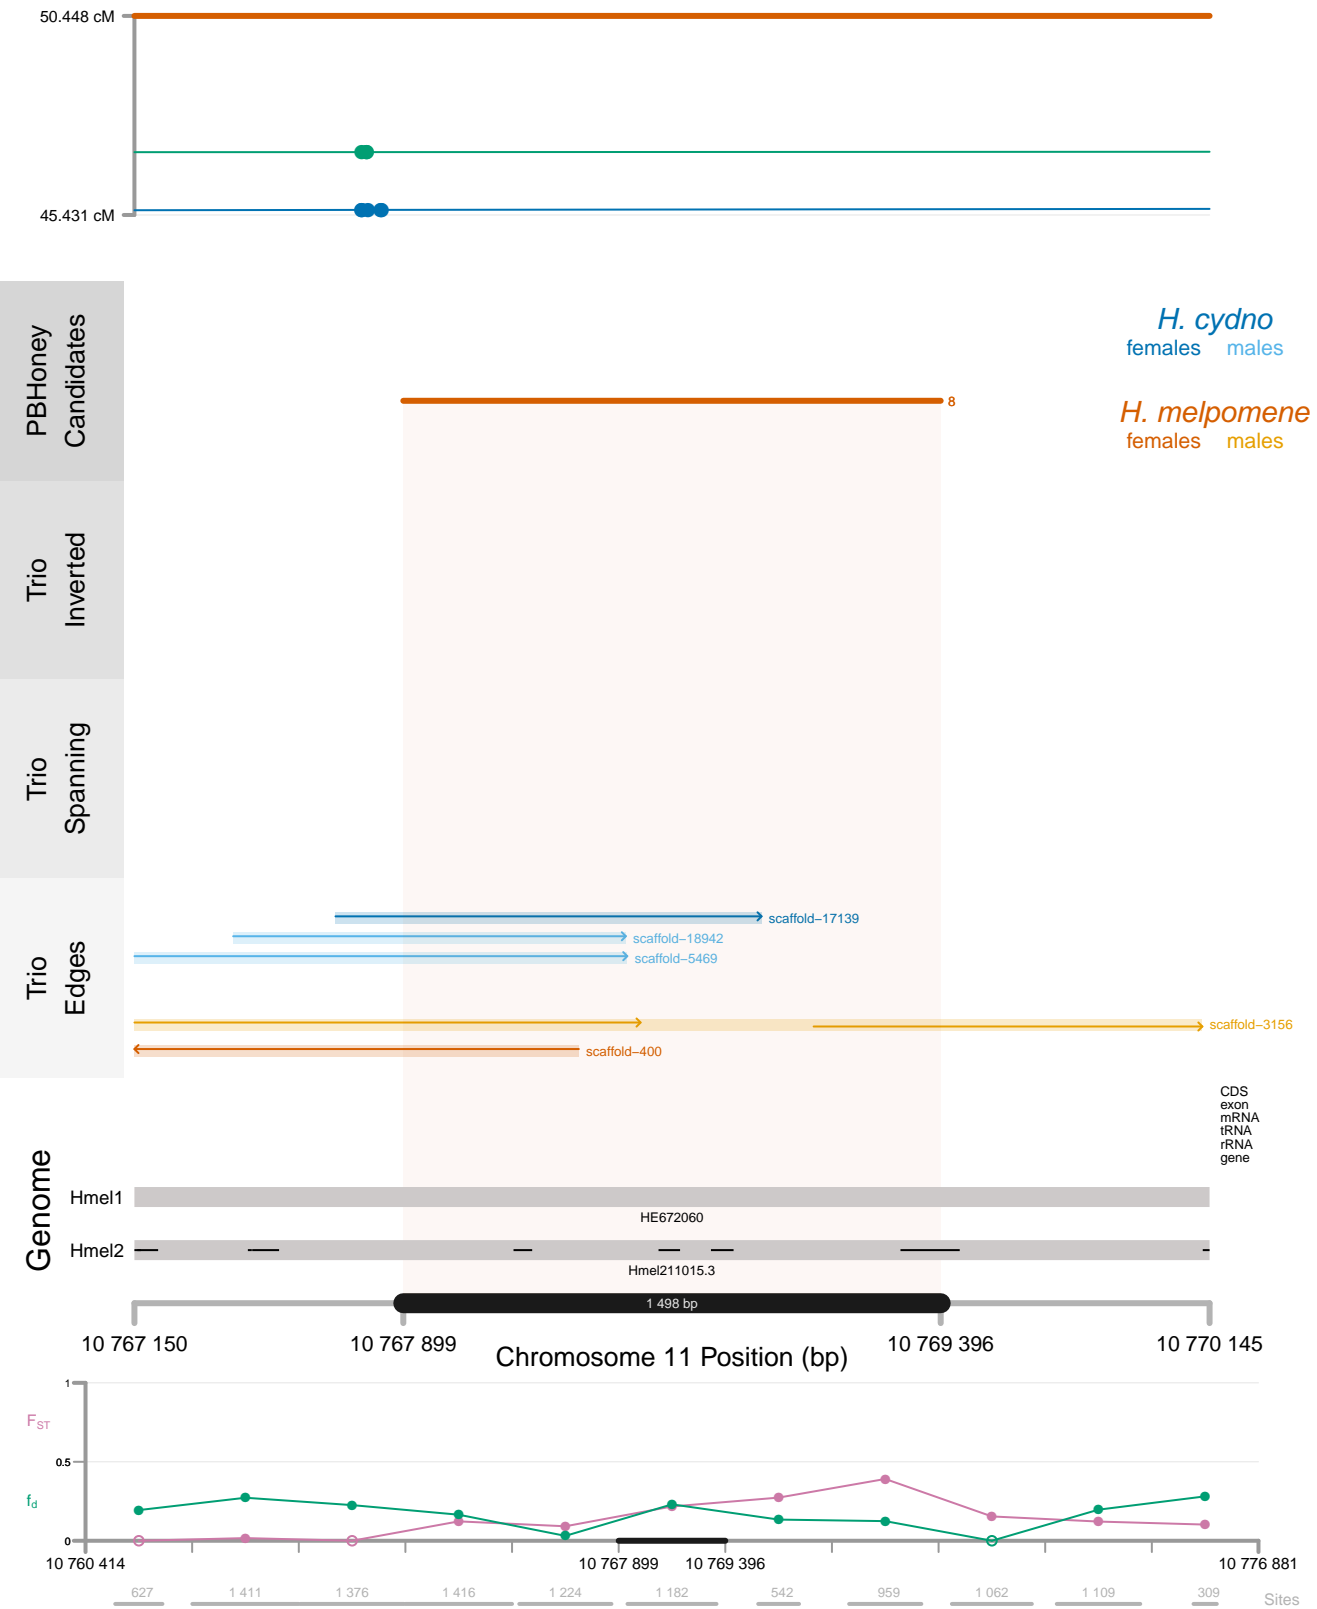

Figure S11.37

*H. melpomene*

Split reads only

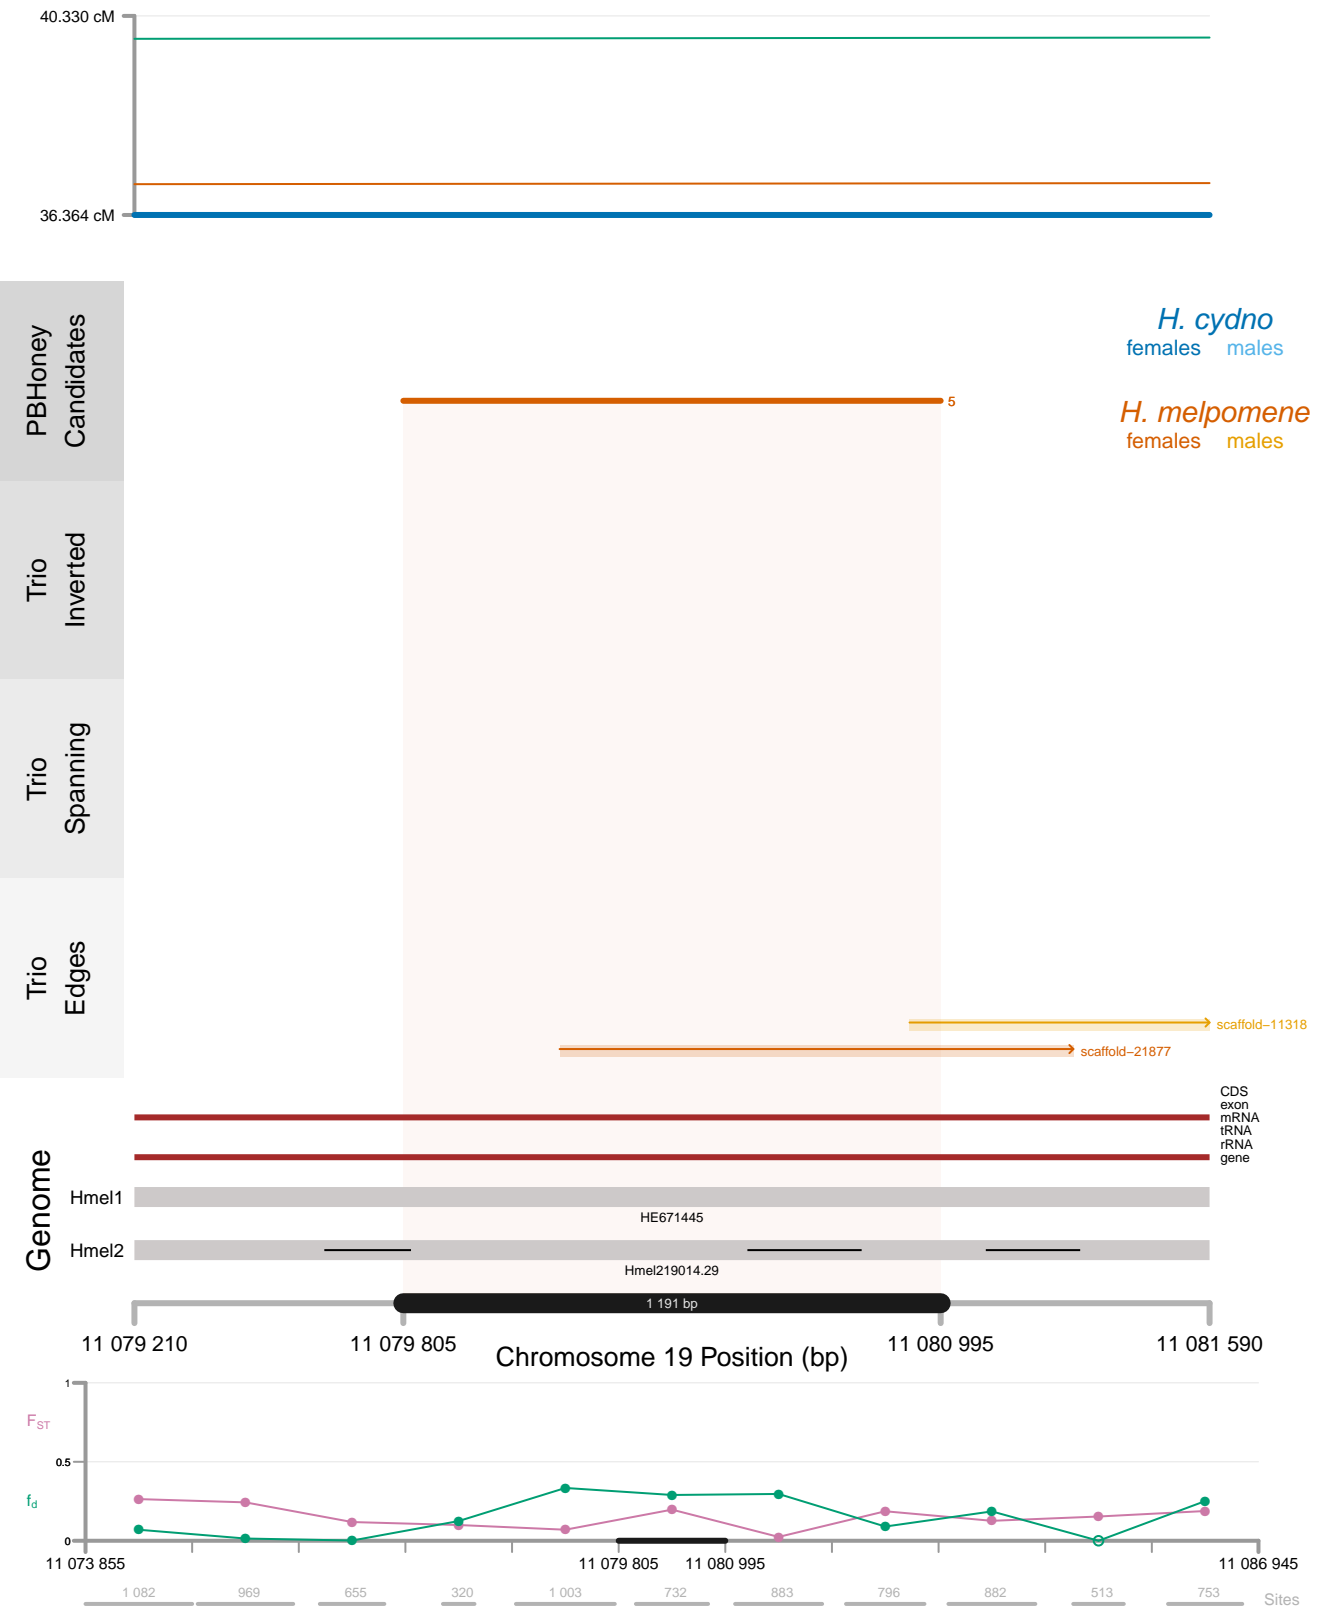

Figure S11.38

*H. melpomene*

Split reads only

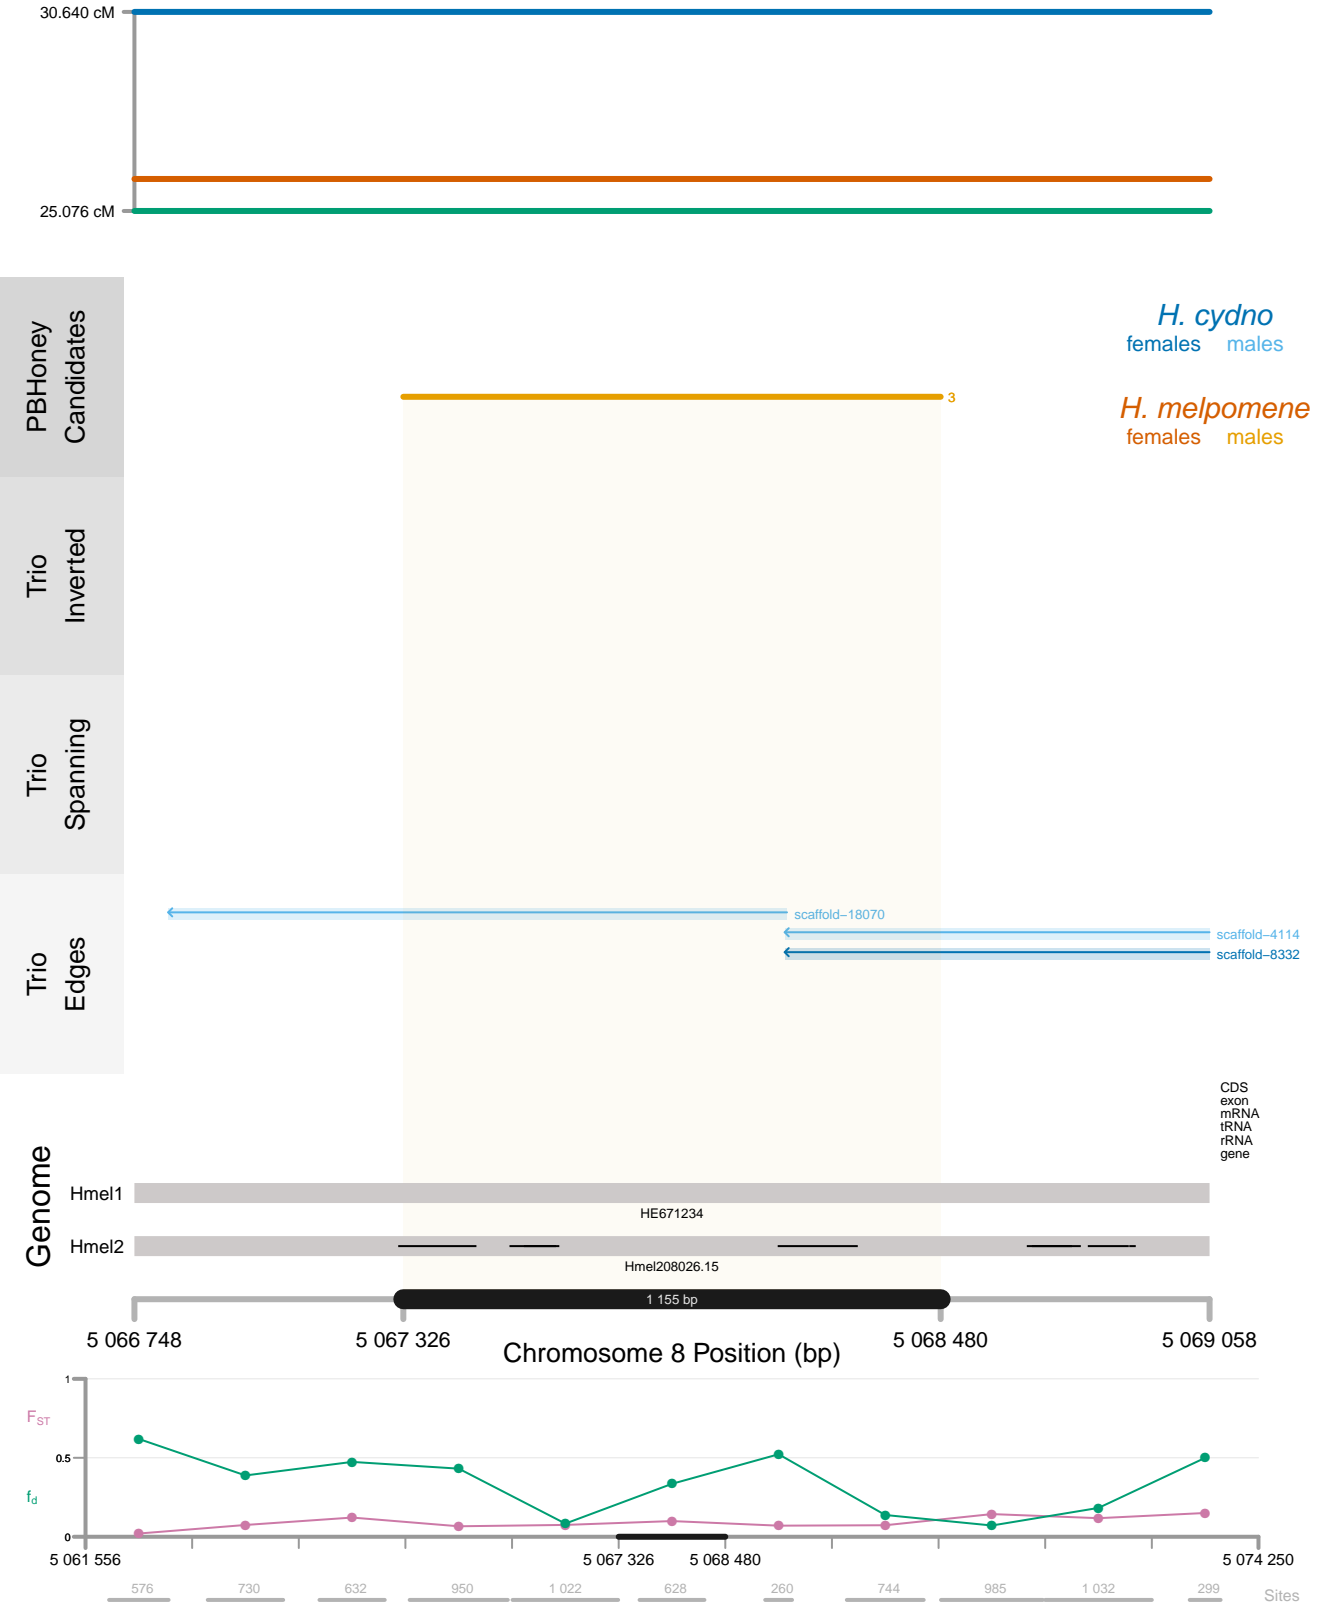

Figure S11.39

*H. melpomene*

Split reads only

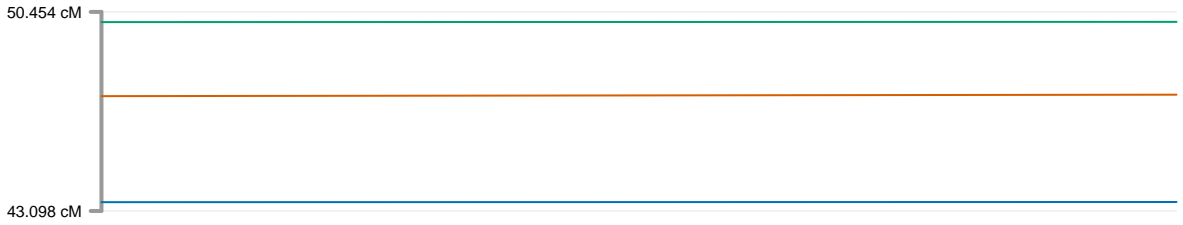

PBHoney Candidates  
 Trio Inverted  
 Trio Spanning  
 Trio Edges

*H. cydno*  
 females males  
*H. melpomene*  
 females males

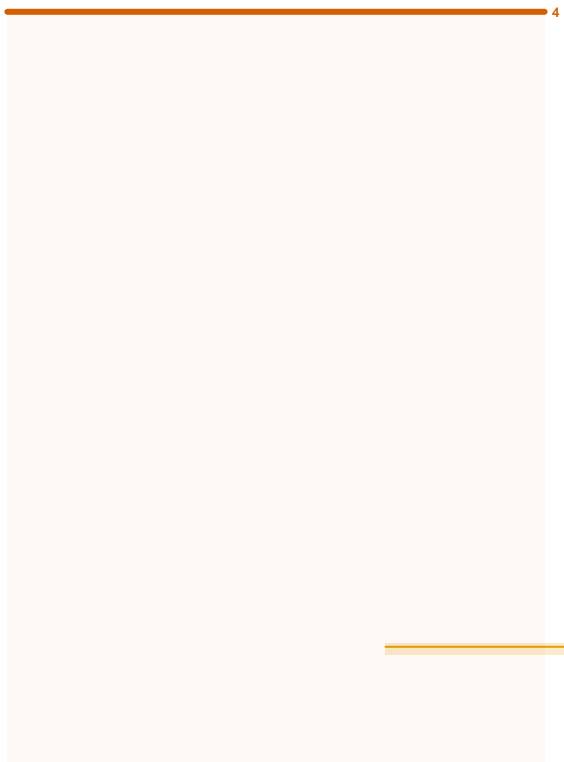

Genome

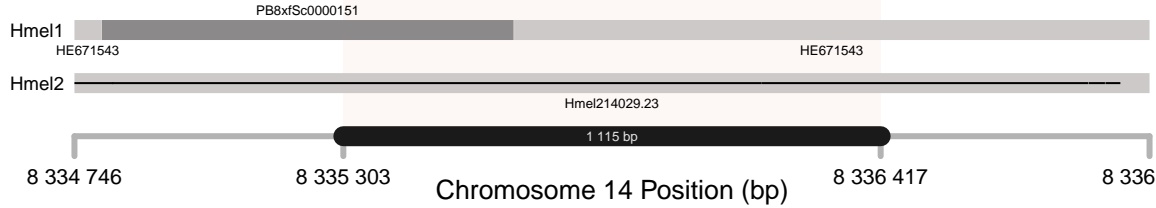

CDS  
 exon  
 mRNA  
 tRNA  
 rRNA  
 gene

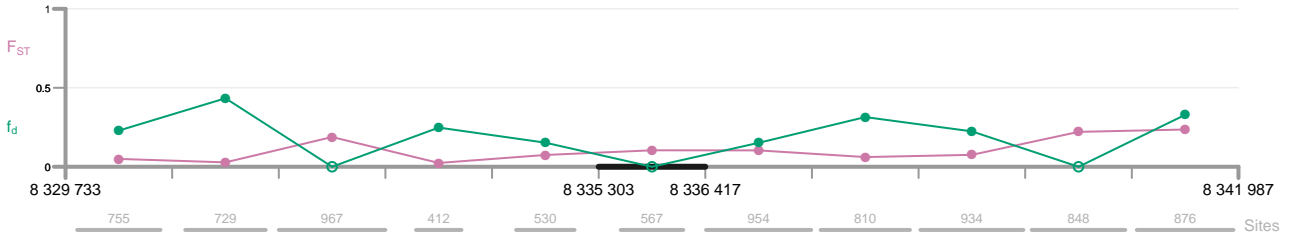

Figure S11.40

*H. melpomene*

Split reads only

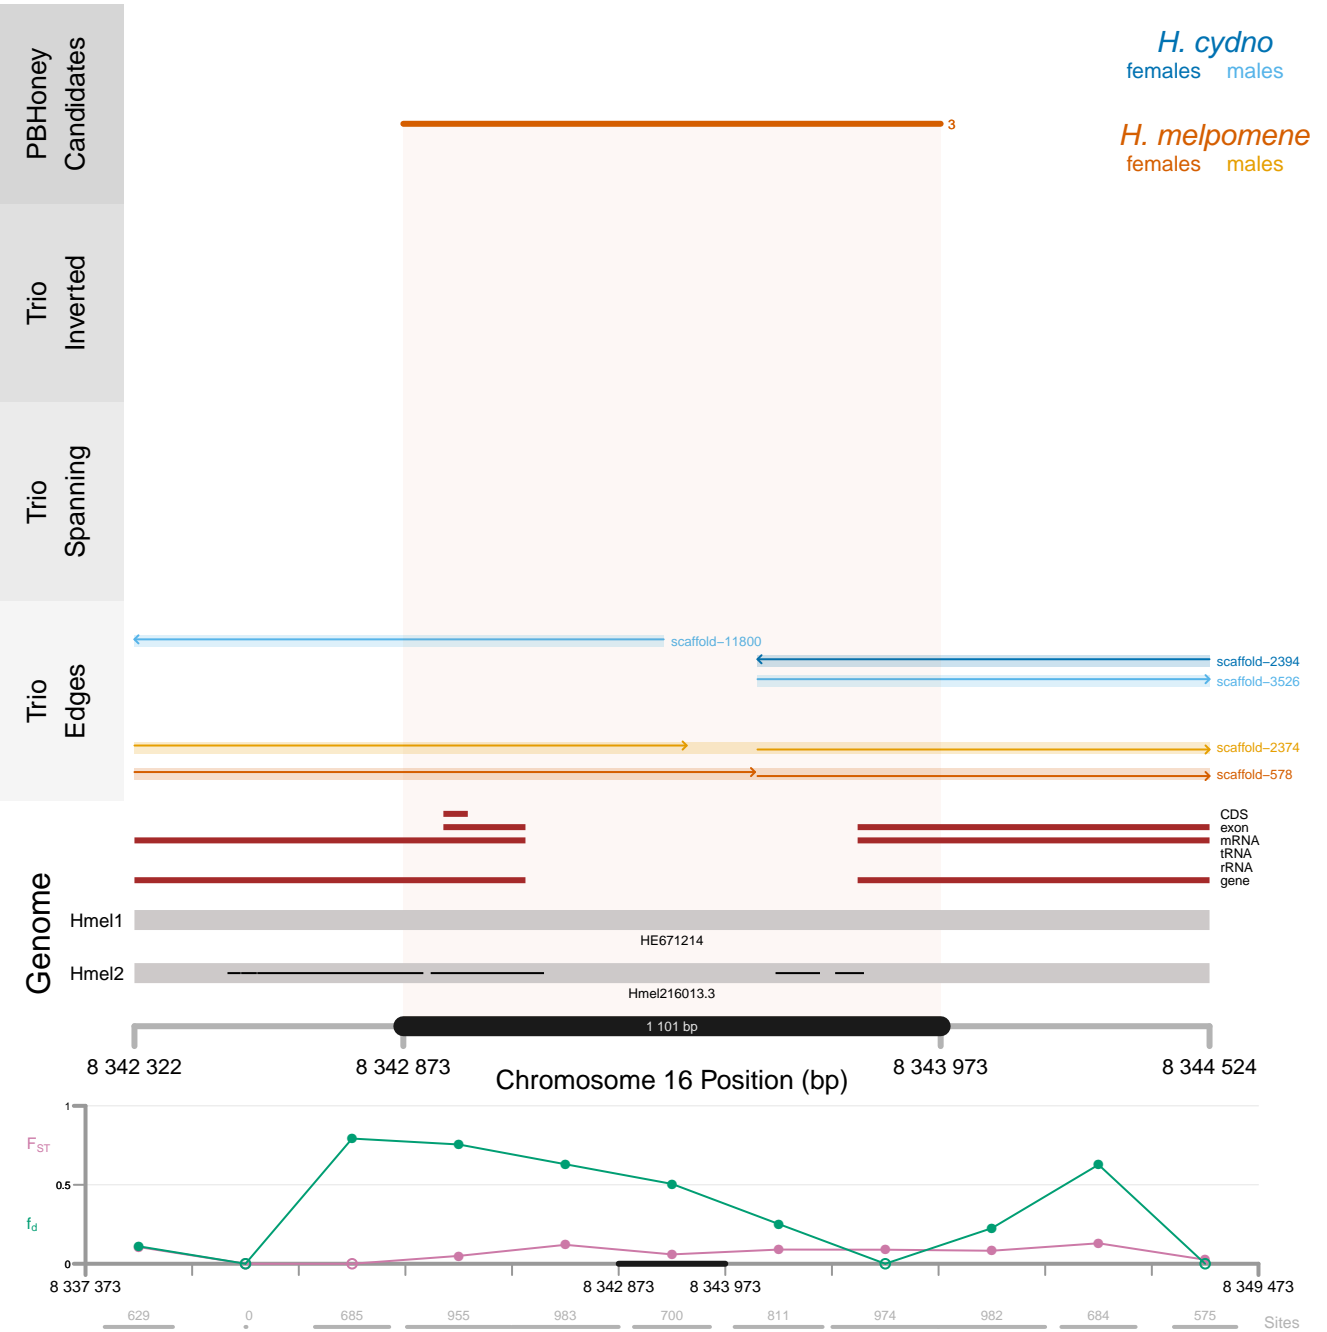



Figure S11.41

*H. melpomene*

Split reads only

PBHoney Candidates  
Trio Inverted  
Trio Spanning  
Trio Edges

*H. cydno*  
females males  
*H. melpomene*  
females males

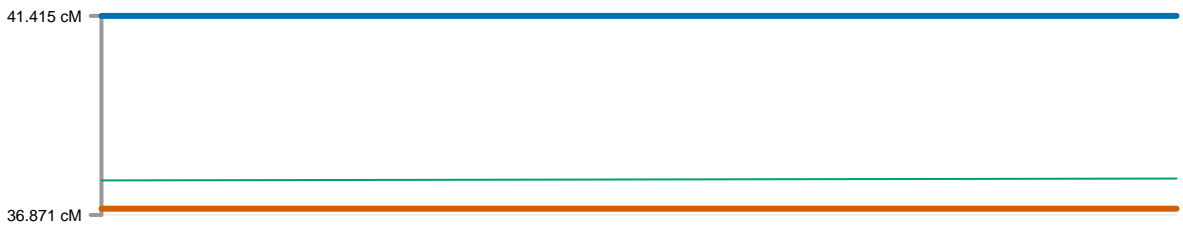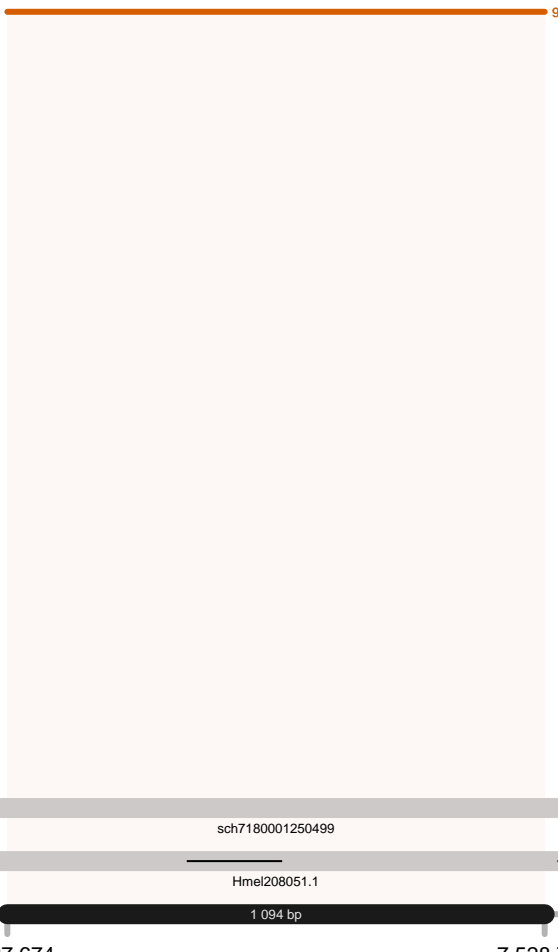

Genome

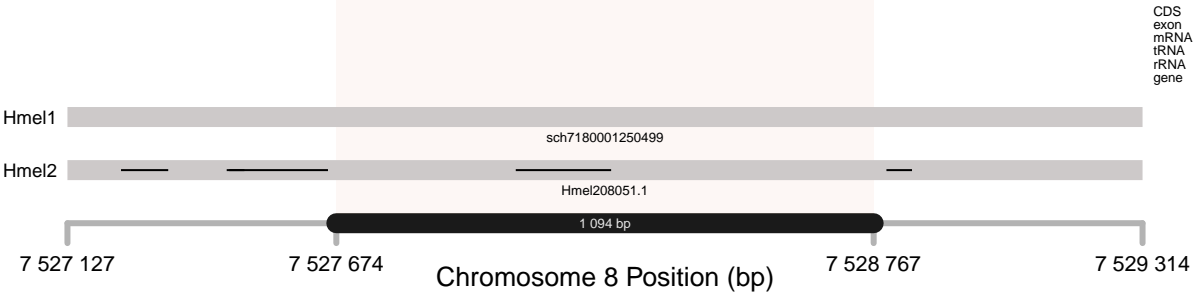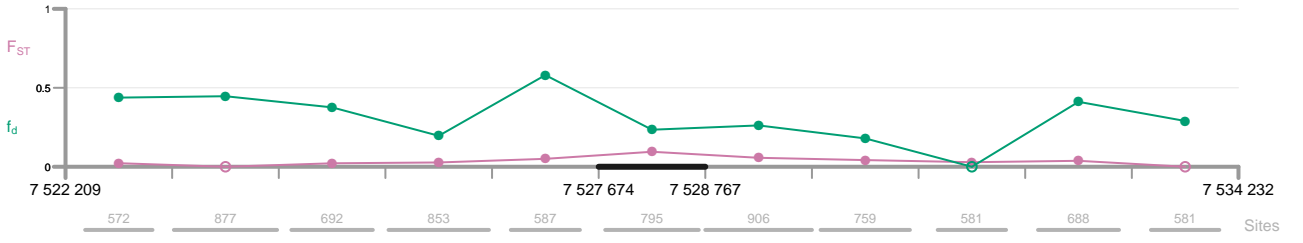

CDS  
exon  
mRNA  
tRNA  
rRNA  
gene

Sites

Figure S11.42

*H. melpomene*

Split reads only

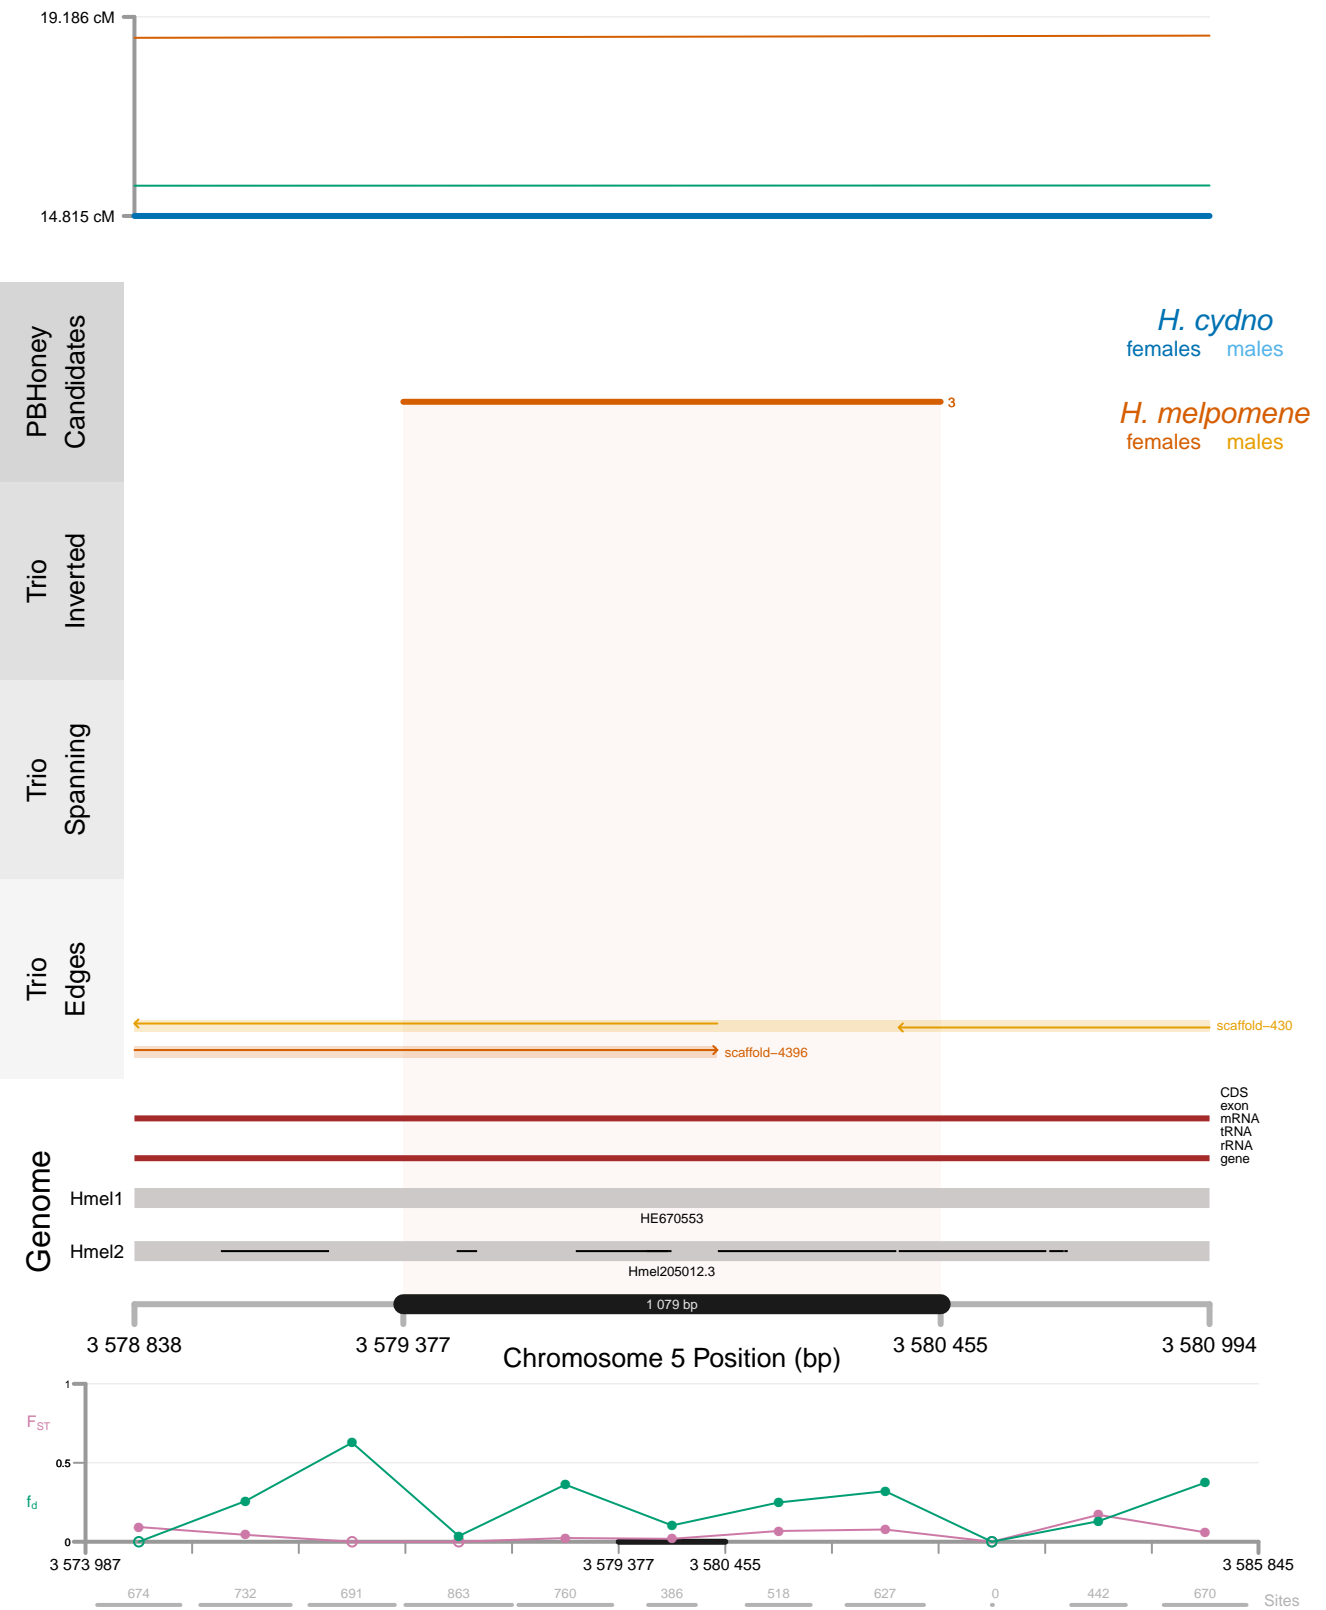

Figure S11.43

*H. melpomene*

Split reads only

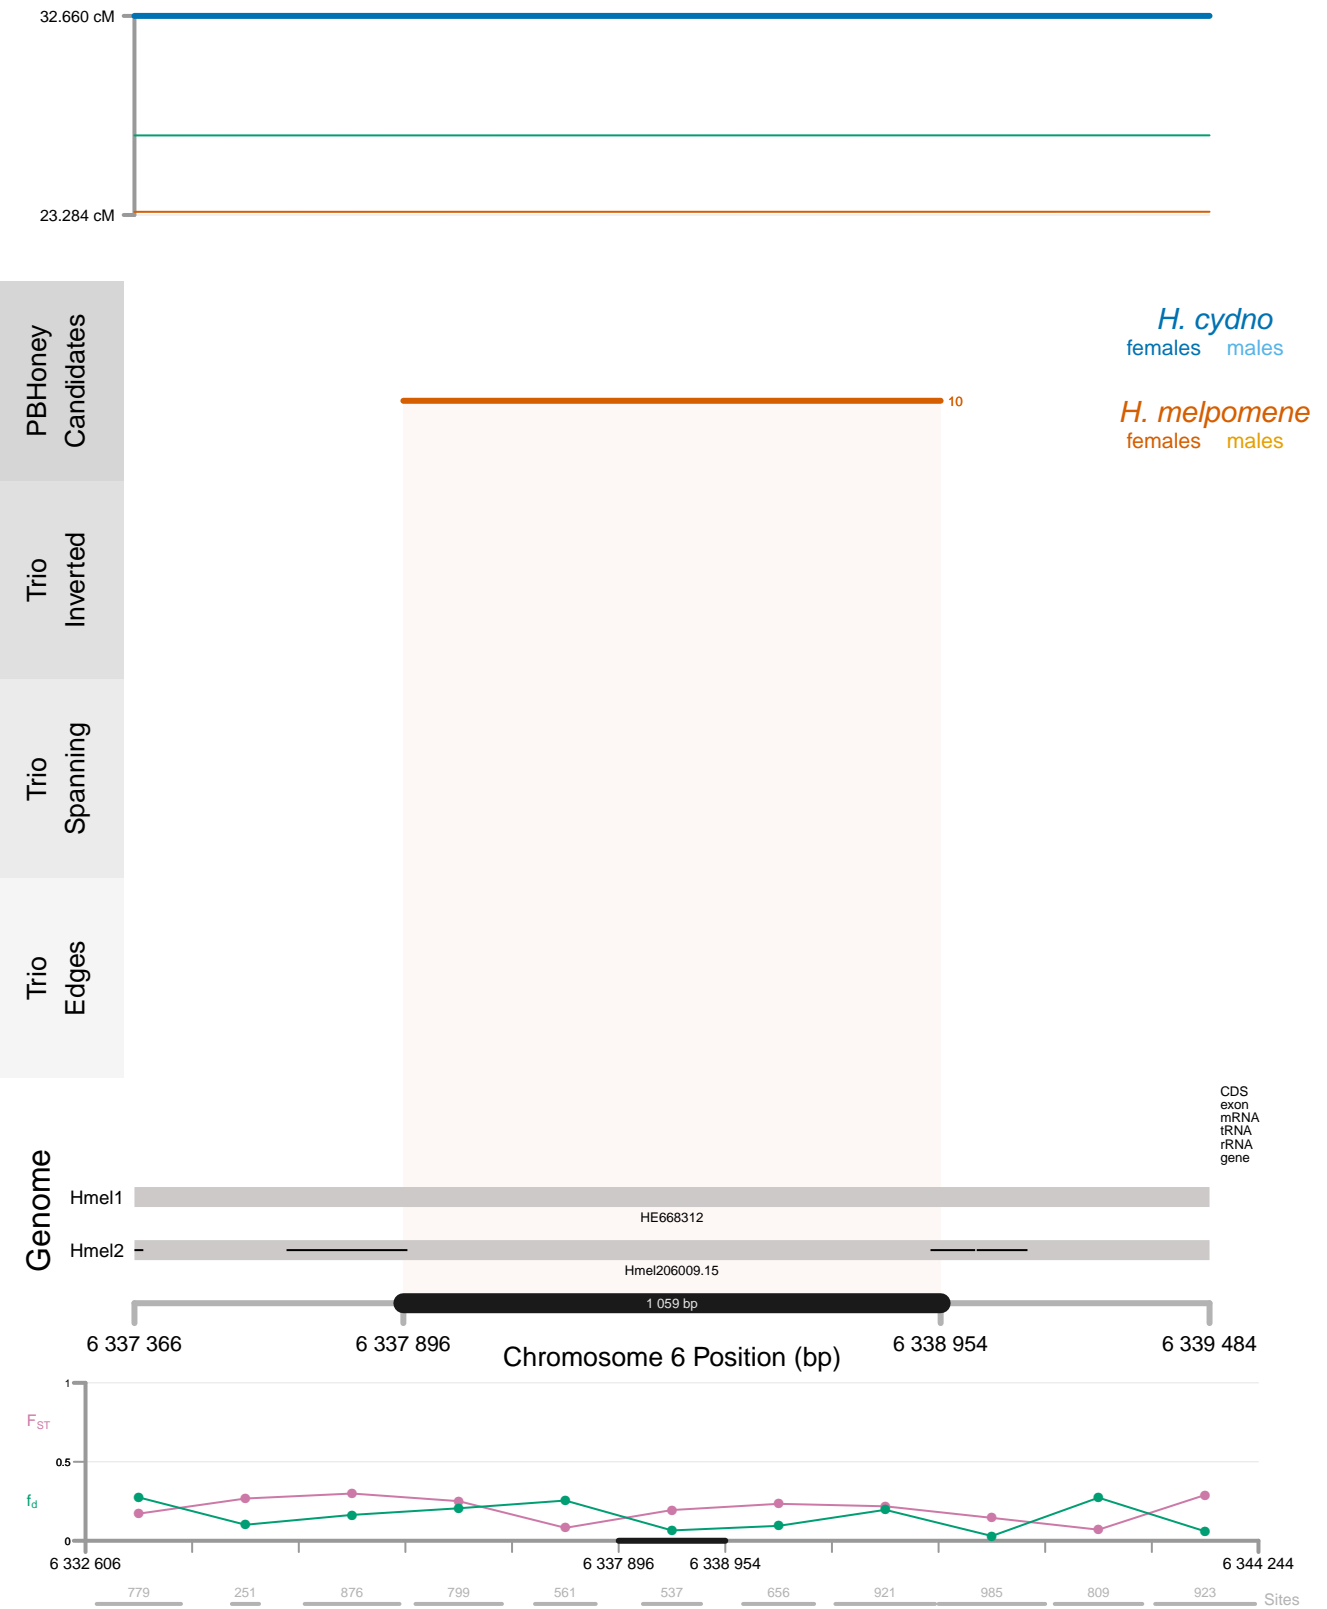

Figure S11.44

*H. melpomene*

Split reads only

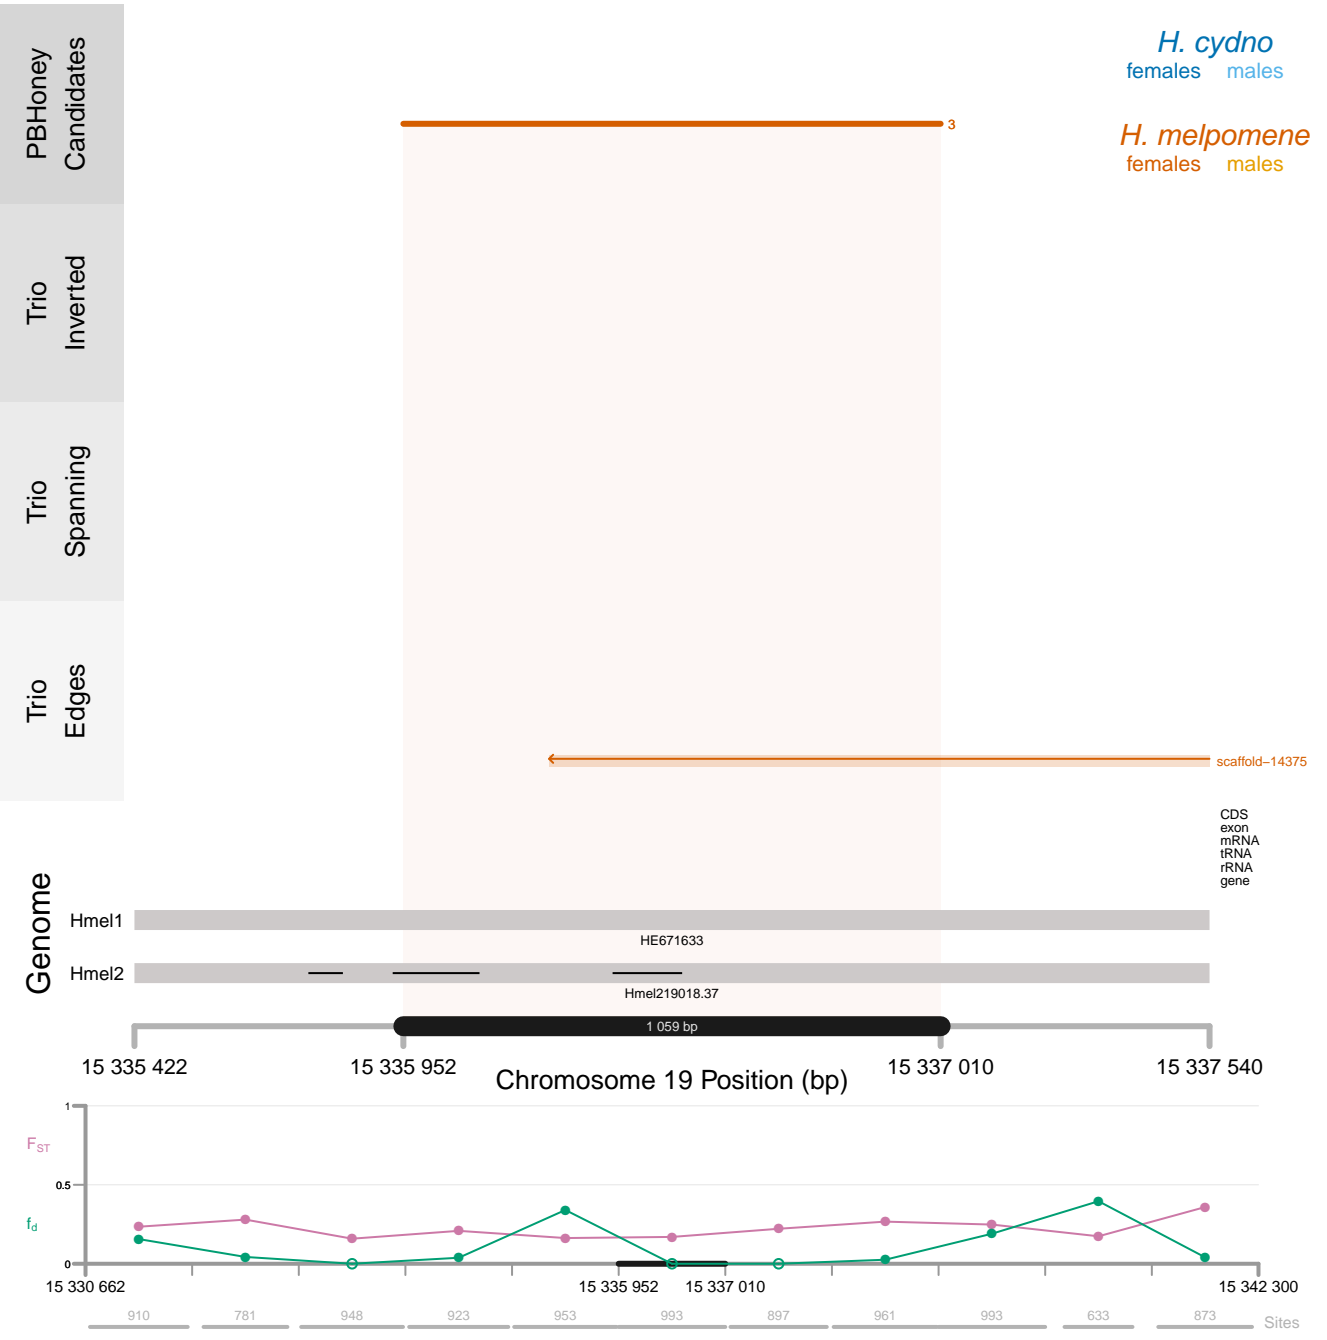

Figure S11.45

*H. melpomene*

Split reads only

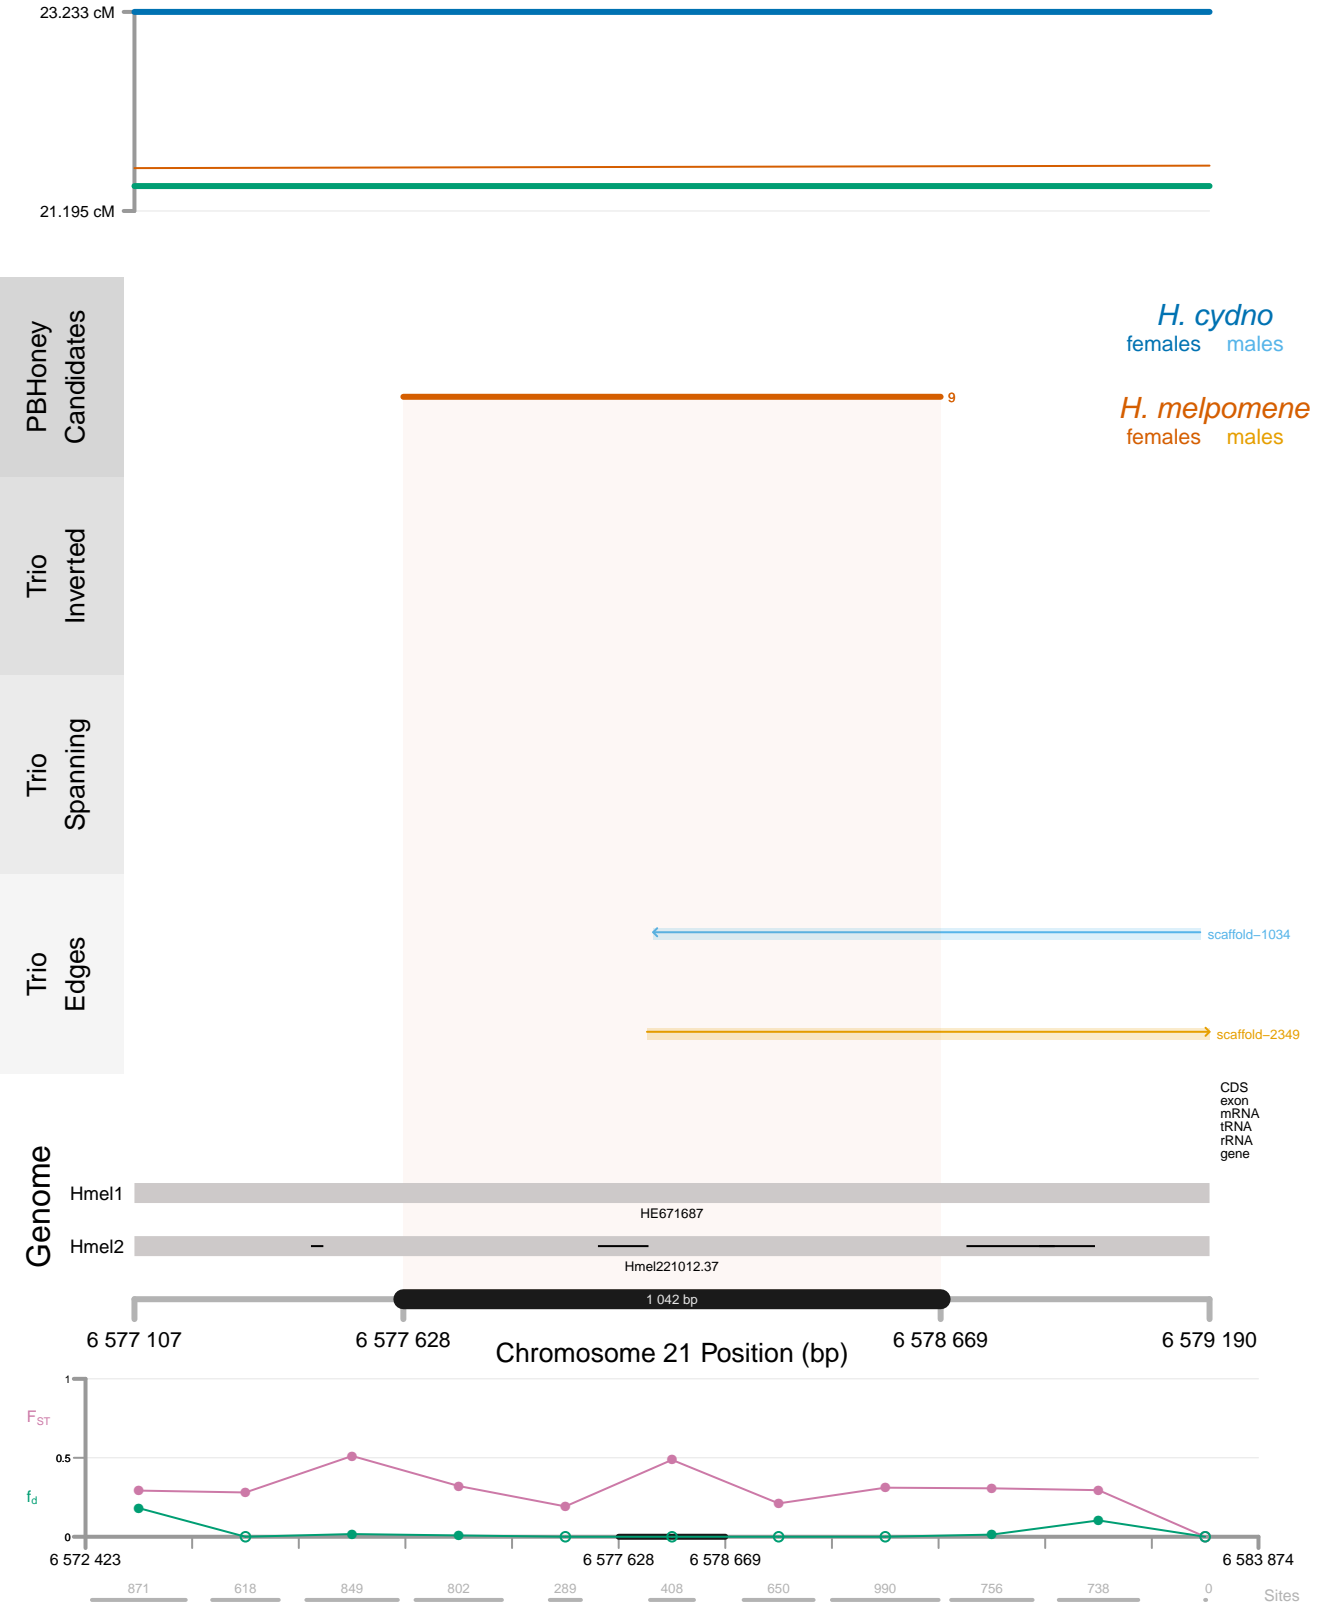

Figure S11.46

*H. melpomene*

Split reads only

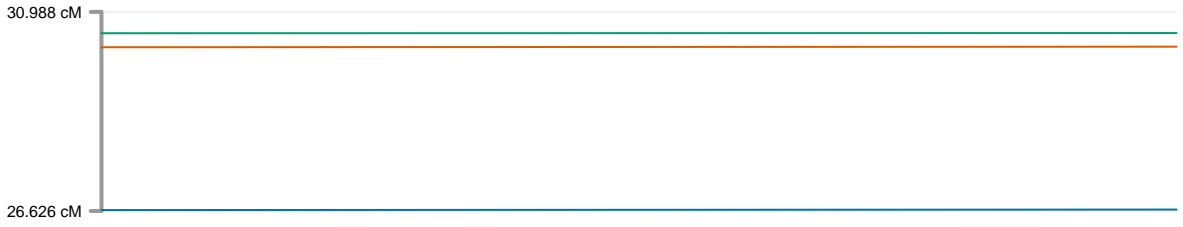

PBHoney Candidates  
Trio Inverted  
Trio Spanning  
Trio Edges

*H. cydno*  
females males  
*H. melpomene*  
females males

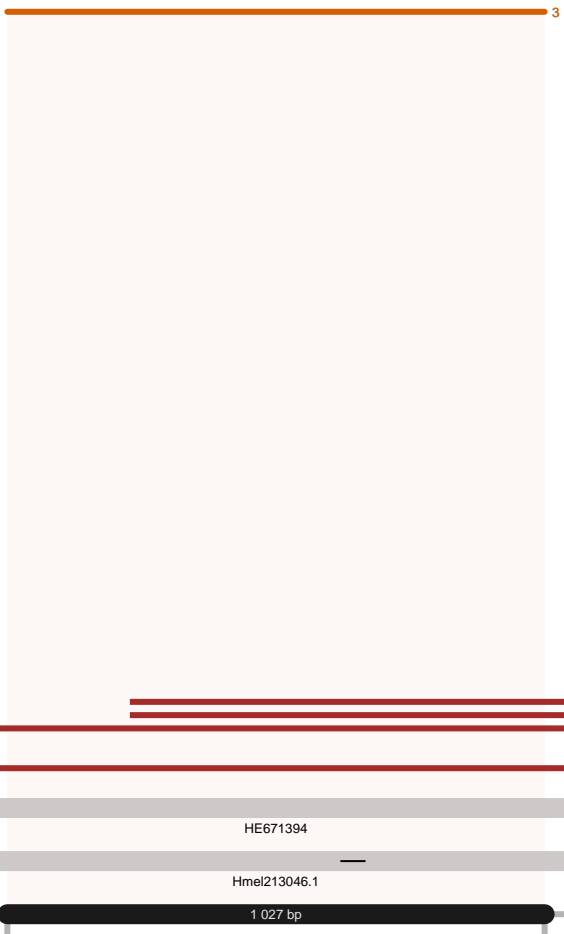

Genome

9 538 708 9 539 221 9 540 247 9 540 760  
Chromosome 13 Position (bp)

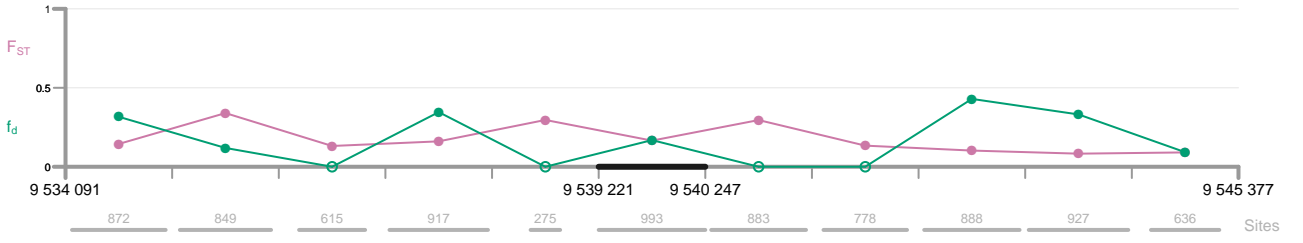

Sites
